# Supplementary material for: A new yeast strain for valorisation of vinasse, a rum distillery waste product
Source: Research Square preprint supplement (doi:10.21203/rs.3.rs-6593393/v1), 2025-05-12
Supplement: Supplementary file 1 [file 2d9f725ca4937e095e14be21.xlsx]

## Sheet: Pos+Neg V128vs1718 Highest Mean
Compound	Compound ID	Accepted?	Adducts	Formula	Description	m/z	Score	Fragmentation Score	Mass Error (ppm)	Isotope Similarity	Theoretical Isotope Distribution	Charge	Retention time (min)	Anova (p)	q Value	Max Fold Change	Highest mean	Link
Positive ion data
Negative ion data
(A) HIGHEST IN V1 28
14.05_751.4421m/z	YMDB01221		M-H	C37H69O13P	PI(12:0/16:1(9Z))	751.442	35.7	0	2.32351	81.4473	100 - 41.3 - 11 - 2.19 - 0.358	1	14.0524	1.36827e-06	0.00414723	Infinity	V1 28	http://nonlinear.com/redirect/outbound?p=hmdb&param=YMDB01221
14.05_751.4421m/z	YMDB01225		M-H	C37H69O13P	PI(14:0/14:1(9Z))	751.442	35.7	0	2.32351	81.4473	100 - 41.3 - 11 - 2.19 - 0.358	1	14.0524	1.36827e-06	0.00414723	Infinity	V1 28	http://nonlinear.com/redirect/outbound?p=hmdb&param=YMDB01225
18.46_852.5770m/z	YMDB01857		M+FA-H	C46H82NO8P	PC(16:0/22:5(4Z,7Z,10Z,13Z,16Z))	852.577	38.2	9.97	1.26336	82.3638	100 - 51.4 - 14.6 - 2.97 - 0.48	1	18.4623	0.00486342	0.159531	Infinity	V1 28	http://nonlinear.com/redirect/outbound?p=hmdb&param=YMDB01857
18.46_852.5770m/z	YMDB01858		M+FA-H	C46H82NO8P	PC(16:0/22:5(7Z,10Z,13Z,16Z,19Z))	852.577	38.2	9.92	1.26336	82.3638	100 - 51.4 - 14.6 - 2.97 - 0.48	1	18.4623	0.00486342	0.159531	Infinity	V1 28	http://nonlinear.com/redirect/outbound?p=hmdb&param=YMDB01858
18.46_852.5770m/z	YMDB01879		M+FA-H	C46H82NO8P	PC(16:1(9Z)/22:4(7Z,10Z,13Z,16Z))	852.577	38.5	11.5	1.26336	82.3638	100 - 51.4 - 14.6 - 2.97 - 0.48	1	18.4623	0.00486342	0.159531	Infinity	V1 28	http://nonlinear.com/redirect/outbound?p=hmdb&param=YMDB01879
18.46_852.5770m/z	YMDB01899		M+FA-H	C46H82NO8P	PC(18:0/20:5(5Z,8Z,11Z,14Z,17Z))	852.577	38.2	9.92	1.26336	82.3638	100 - 51.4 - 14.6 - 2.97 - 0.48	1	18.4623	0.00486342	0.159531	Infinity	V1 28	http://nonlinear.com/redirect/outbound?p=hmdb&param=YMDB01899
18.46_852.5770m/z	YMDB01920		M+FA-H	C46H82NO8P	PC(18:1(11Z)/20:4(5Z,8Z,11Z,14Z))	852.577	38.3	10.8	1.26336	82.3638	100 - 51.4 - 14.6 - 2.97 - 0.48	1	18.4623	0.00486342	0.159531	Infinity	V1 28	http://nonlinear.com/redirect/outbound?p=hmdb&param=YMDB01920
18.46_852.5770m/z	YMDB01921		M+FA-H	C46H82NO8P	PC(18:1(11Z)/20:4(8Z,11Z,14Z,17Z))	852.577	38.3	10.7	1.26336	82.3638	100 - 51.4 - 14.6 - 2.97 - 0.48	1	18.4623	0.00486342	0.159531	Infinity	V1 28	http://nonlinear.com/redirect/outbound?p=hmdb&param=YMDB01921
18.46_852.5770m/z	YMDB01944		M+FA-H	C46H82NO8P	PC(18:1(9Z)/20:4(5Z,8Z,11Z,14Z))	852.577	38.3	10.8	1.26336	82.3638	100 - 51.4 - 14.6 - 2.97 - 0.48	1	18.4623	0.00486342	0.159531	Infinity	V1 28	http://nonlinear.com/redirect/outbound?p=hmdb&param=YMDB01944
18.46_852.5770m/z	YMDB01945		M+FA-H	C46H82NO8P	PC(18:1(9Z)/20:4(8Z,11Z,14Z,17Z))	852.577	38.3	10.7	1.26336	82.3638	100 - 51.4 - 14.6 - 2.97 - 0.48	1	18.4623	0.00486342	0.159531	Infinity	V1 28	http://nonlinear.com/redirect/outbound?p=hmdb&param=YMDB01945
18.46_852.5770m/z	YMDB01962		M+FA-H	C46H82NO8P	PC(18:2(9Z,12Z)/20:3(5Z,8Z,11Z))	852.577	38.5	11.8	1.26336	82.3638	100 - 51.4 - 14.6 - 2.97 - 0.48	1	18.4623	0.00486342	0.159531	Infinity	V1 28	http://nonlinear.com/redirect/outbound?p=hmdb&param=YMDB01962
18.46_852.5770m/z	YMDB01968		M+FA-H	C46H82NO8P	PC(18:2(9Z,12Z)/20:3(8Z,11Z,14Z))	852.577	38.5	11.8	1.26336	82.3638	100 - 51.4 - 14.6 - 2.97 - 0.48	1	18.4623	0.00486342	0.159531	Infinity	V1 28	http://nonlinear.com/redirect/outbound?p=hmdb&param=YMDB01968
18.46_852.5770m/z	YMDB01989		M+FA-H	C46H82NO8P	PC(18:3(6Z,9Z,12Z)/20:2(11Z,14Z))	852.577	38.6	12.1	1.26336	82.3638	100 - 51.4 - 14.6 - 2.97 - 0.48	1	18.4623	0.00486342	0.159531	Infinity	V1 28	http://nonlinear.com/redirect/outbound?p=hmdb&param=YMDB01989
18.46_852.5770m/z	YMDB02010		M+FA-H	C46H82NO8P	PC(18:3(9Z,12Z,15Z)/20:2(11Z,14Z))	852.577	38.6	12.1	1.26336	82.3638	100 - 51.4 - 14.6 - 2.97 - 0.48	1	18.4623	0.00486342	0.159531	Infinity	V1 28	http://nonlinear.com/redirect/outbound?p=hmdb&param=YMDB02010
18.46_852.5770m/z	YMDB02027		M+FA-H	C46H82NO8P	PC(18:4(6Z,9Z,12Z,15Z)/20:1(11Z))	852.577	38.4	11	1.26336	82.3638	100 - 51.4 - 14.6 - 2.97 - 0.48	1	18.4623	0.00486342	0.159531	Infinity	V1 28	http://nonlinear.com/redirect/outbound?p=hmdb&param=YMDB02027
18.46_852.5770m/z	YMDB02057		M+FA-H	C46H82NO8P	PC(20:1(11Z)/18:4(6Z,9Z,12Z,15Z))	852.577	38.4	11	1.26336	82.3638	100 - 51.4 - 14.6 - 2.97 - 0.48	1	18.4623	0.00486342	0.159531	Infinity	V1 28	http://nonlinear.com/redirect/outbound?p=hmdb&param=YMDB02057
18.46_852.5770m/z	YMDB02074		M+FA-H	C46H82NO8P	PC(20:2(11Z,14Z)/18:3(6Z,9Z,12Z))	852.577	38.6	12.1	1.26336	82.3638	100 - 51.4 - 14.6 - 2.97 - 0.48	1	18.4623	0.00486342	0.159531	Infinity	V1 28	http://nonlinear.com/redirect/outbound?p=hmdb&param=YMDB02074
18.46_852.5770m/z	YMDB02075		M+FA-H	C46H82NO8P	PC(20:2(11Z,14Z)/18:3(9Z,12Z,15Z))	852.577	38.6	12.1	1.26336	82.3638	100 - 51.4 - 14.6 - 2.97 - 0.48	1	18.4623	0.00486342	0.159531	Infinity	V1 28	http://nonlinear.com/redirect/outbound?p=hmdb&param=YMDB02075
18.46_852.5770m/z	YMDB02094		M+FA-H	C46H82NO8P	PC(20:3(5Z,8Z,11Z)/18:2(9Z,12Z))	852.577	38.5	11.8	1.26336	82.3638	100 - 51.4 - 14.6 - 2.97 - 0.48	1	18.4623	0.00486342	0.159531	Infinity	V1 28	http://nonlinear.com/redirect/outbound?p=hmdb&param=YMDB02094
18.46_852.5770m/z	YMDB02112		M+FA-H	C46H82NO8P	PC(20:3(8Z,11Z,14Z)/18:2(9Z,12Z))	852.577	38.5	11.8	1.26336	82.3638	100 - 51.4 - 14.6 - 2.97 - 0.48	1	18.4623	0.00486342	0.159531	Infinity	V1 28	http://nonlinear.com/redirect/outbound?p=hmdb&param=YMDB02112
18.46_852.5770m/z	YMDB02124		M+FA-H	C46H82NO8P	PC(20:4(5Z,8Z,11Z,14Z)/18:1(11Z))	852.577	38.3	10.8	1.26336	82.3638	100 - 51.4 - 14.6 - 2.97 - 0.48	1	18.4623	0.00486342	0.159531	Infinity	V1 28	http://nonlinear.com/redirect/outbound?p=hmdb&param=YMDB02124
18.46_852.5770m/z	YMDB02125		M+FA-H	C46H82NO8P	PC(20:4(5Z,8Z,11Z,14Z)/18:1(9Z))	852.577	38.3	10.8	1.26336	82.3638	100 - 51.4 - 14.6 - 2.97 - 0.48	1	18.4623	0.00486342	0.159531	Infinity	V1 28	http://nonlinear.com/redirect/outbound?p=hmdb&param=YMDB02125
18.46_852.5770m/z	YMDB02134		M+FA-H	C46H82NO8P	PC(20:4(8Z,11Z,14Z,17Z)/18:1(11Z))	852.577	38.3	10.7	1.26336	82.3638	100 - 51.4 - 14.6 - 2.97 - 0.48	1	18.4623	0.00486342	0.159531	Infinity	V1 28	http://nonlinear.com/redirect/outbound?p=hmdb&param=YMDB02134
16.29_767.4879m/z	YMDB01212		M+Na-2H	C40H75O10P	PG(16:1(9Z)/18:1(9Z))	767.488	40	11	4.68143	94.2935	100 - 44.5 - 11.7 - 2.28 - 0.359	1	16.2917	0.00519171	0.162711	110.354	V1 28	http://nonlinear.com/redirect/outbound?p=hmdb&param=YMDB01212
16.14_810.5299m/z	YMDB01257		M+Na-2H	C42H80NO10P	PS(18:0/18:1(9Z))	810.53	37.6	2.28	4.05511	90.2642	100 - 47.1 - 12.9 - 2.59 - 0.42	1	16.1377	0.000463827	0.0563388	85.9735	V1 28	http://nonlinear.com/redirect/outbound?p=hmdb&param=YMDB01257
15.79_822.5300m/z	YMDB01826		M+FA-H	C44H76NO8P	PC(14:0/22:6(4Z,7Z,10Z,13Z,16Z,19Z))	822.53	51.2	68	1.23966	89.6869	100 - 49.1 - 13.5 - 2.66 - 0.419	1	15.7886	0.00783668	0.197942	60.1971	V1 28	http://nonlinear.com/redirect/outbound?p=hmdb&param=YMDB01826
15.79_822.5300m/z	YMDB01841		M+FA-H	C44H76NO8P	PC(14:1(9Z)/22:5(4Z,7Z,10Z,13Z,16Z))	822.53	51.6	69.8	1.23966	89.6869	100 - 49.1 - 13.5 - 2.66 - 0.419	1	15.7886	0.00783668	0.197942	60.1971	V1 28	http://nonlinear.com/redirect/outbound?p=hmdb&param=YMDB01841
15.79_822.5300m/z	YMDB01842		M+FA-H	C44H76NO8P	PC(14:1(9Z)/22:5(7Z,10Z,13Z,16Z,19Z))	822.53	51.2	68	1.23966	89.6869	100 - 49.1 - 13.5 - 2.66 - 0.419	1	15.7886	0.00783668	0.197942	60.1971	V1 28	http://nonlinear.com/redirect/outbound?p=hmdb&param=YMDB01842
15.79_822.5300m/z	YMDB01877		M+FA-H	C44H76NO8P	PC(16:1(9Z)/20:5(5Z,8Z,11Z,14Z,17Z))	822.53	51.2	68	1.23966	89.6869	100 - 49.1 - 13.5 - 2.66 - 0.419	1	15.7886	0.00783668	0.197942	60.1971	V1 28	http://nonlinear.com/redirect/outbound?p=hmdb&param=YMDB01877
15.79_822.5300m/z	YMDB01965		M+FA-H	C44H76NO8P	PC(18:2(9Z,12Z)/18:4(6Z,9Z,12Z,15Z))	822.53	52.1	72.5	1.23966	89.6869	100 - 49.1 - 13.5 - 2.66 - 0.419	1	15.7886	0.00783668	0.197942	60.1971	V1 28	http://nonlinear.com/redirect/outbound?p=hmdb&param=YMDB01965
15.79_822.5300m/z	YMDB01985		M+FA-H	C44H76NO8P	PC(18:3(6Z,9Z,12Z)/18:3(6Z,9Z,12Z))	822.53	51.3	68.4	1.23966	89.6869	100 - 49.1 - 13.5 - 2.66 - 0.419	1	15.7886	0.00783668	0.197942	60.1971	V1 28	http://nonlinear.com/redirect/outbound?p=hmdb&param=YMDB01985
15.79_822.5300m/z	YMDB01986		M+FA-H	C44H76NO8P	PC(18:3(6Z,9Z,12Z)/18:3(9Z,12Z,15Z))	822.53	51.6	69.8	1.23966	89.6869	100 - 49.1 - 13.5 - 2.66 - 0.419	1	15.7886	0.00783668	0.197942	60.1971	V1 28	http://nonlinear.com/redirect/outbound?p=hmdb&param=YMDB01986
15.79_822.5300m/z	YMDB02006		M+FA-H	C44H76NO8P	PC(18:3(9Z,12Z,15Z)/18:3(6Z,9Z,12Z))	822.53	51.6	69.8	1.23966	89.6869	100 - 49.1 - 13.5 - 2.66 - 0.419	1	15.7886	0.00783668	0.197942	60.1971	V1 28	http://nonlinear.com/redirect/outbound?p=hmdb&param=YMDB02006
15.79_822.5300m/z	YMDB02007		M+FA-H	C44H76NO8P	PC(18:3(9Z,12Z,15Z)/18:3(9Z,12Z,15Z))	822.53	51.5	69.5	1.23966	89.6869	100 - 49.1 - 13.5 - 2.66 - 0.419	1	15.7886	0.00783668	0.197942	60.1971	V1 28	http://nonlinear.com/redirect/outbound?p=hmdb&param=YMDB02007
15.79_822.5300m/z	YMDB02025		M+FA-H	C44H76NO8P	PC(18:4(6Z,9Z,12Z,15Z)/18:2(9Z,12Z))	822.53	52	71.7	1.23966	89.6869	100 - 49.1 - 13.5 - 2.66 - 0.419	1	15.7886	0.00783668	0.197942	60.1971	V1 28	http://nonlinear.com/redirect/outbound?p=hmdb&param=YMDB02025
15.79_822.5300m/z	YMDB02140		M+FA-H	C44H76NO8P	PC(20:5(5Z,8Z,11Z,14Z,17Z)/16:1(9Z))	822.53	51.2	68	1.23966	89.6869	100 - 49.1 - 13.5 - 2.66 - 0.419	1	15.7886	0.00783668	0.197942	60.1971	V1 28	http://nonlinear.com/redirect/outbound?p=hmdb&param=YMDB02140
15.79_822.5300m/z	YMDB02191		M+FA-H	C44H76NO8P	PC(22:5(4Z,7Z,10Z,13Z,16Z)/14:1(9Z))	822.53	51.6	69.8	1.23966	89.6869	100 - 49.1 - 13.5 - 2.66 - 0.419	1	15.7886	0.00783668	0.197942	60.1971	V1 28	http://nonlinear.com/redirect/outbound?p=hmdb&param=YMDB02191
15.79_822.5300m/z	YMDB02193		M+FA-H	C44H76NO8P	PC(22:5(7Z,10Z,13Z,16Z,19Z)/14:1(9Z))	822.53	51.2	68	1.23966	89.6869	100 - 49.1 - 13.5 - 2.66 - 0.419	1	15.7886	0.00783668	0.197942	60.1971	V1 28	http://nonlinear.com/redirect/outbound?p=hmdb&param=YMDB02193
15.79_822.5300m/z	YMDB02194		M+FA-H	C44H76NO8P	PC(22:6(4Z,7Z,10Z,13Z,16Z,19Z)/14:0)	822.53	51.2	68	1.23966	89.6869	100 - 49.1 - 13.5 - 2.66 - 0.419	1	15.7886	0.00783668	0.197942	60.1971	V1 28	http://nonlinear.com/redirect/outbound?p=hmdb&param=YMDB02194
6.23_518.2506m/z	YMDB01250		M+Na-2H	C22H44NO9P	PS(16:0/0:0)	518.251	45.6	37.3	1.05802	91.7729	100 - 25 - 4.85 - 0.691	1	6.2263	0.00626692	0.182644	28.5755	V1 28	http://nonlinear.com/redirect/outbound?p=hmdb&param=YMDB01250
9.24_492.3108m/z	YMDB01184		M-H	C24H48NO7P	PC(16:1(9Z)/0:0)	492.311	35.9	0.634	2.5587	82.0094	100 - 27.1 - 4.98 - 0.686	1	9.24225	0.0260738	0.326959	28.4731	V1 28	http://nonlinear.com/redirect/outbound?p=hmdb&param=YMDB01184
9.24_492.3108m/z	YMDB02210		M-H	C24H48NO7P	LysoPC(16:1(9Z))	492.311	35.9	0.634	2.5587	82.0094	100 - 27.1 - 4.98 - 0.686	1	9.24225	0.0260738	0.326959	28.4731	V1 28	http://nonlinear.com/redirect/outbound?p=hmdb&param=YMDB02210
16.94_824.5451m/z	YMDB01824		M+FA-H	C44H78NO8P	PC(14:0/22:5(4Z,7Z,10Z,13Z,16Z))	824.545	52.3	70.1	0.452397	91.8179	100 - 49.2 - 13.5 - 2.66 - 0.419	1	16.942	0.0010666	0.0788505	25.5417	V1 28	http://nonlinear.com/redirect/outbound?p=hmdb&param=YMDB01824
16.94_824.5451m/z	YMDB01825		M+FA-H	C44H78NO8P	PC(14:0/22:5(7Z,10Z,13Z,16Z,19Z))	824.545	53.1	74.2	0.452397	91.8179	100 - 49.2 - 13.5 - 2.66 - 0.419	1	16.942	0.0010666	0.0788505	25.5417	V1 28	http://nonlinear.com/redirect/outbound?p=hmdb&param=YMDB01825
16.94_824.5451m/z	YMDB01840		M+FA-H	C44H78NO8P	PC(14:1(9Z)/22:4(7Z,10Z,13Z,16Z))	824.545	52.3	70.1	0.452397	91.8179	100 - 49.2 - 13.5 - 2.66 - 0.419	1	16.942	0.0010666	0.0788505	25.5417	V1 28	http://nonlinear.com/redirect/outbound?p=hmdb&param=YMDB01840
16.94_824.5451m/z	YMDB01855		M+FA-H	C44H78NO8P	PC(16:0/20:5(5Z,8Z,11Z,14Z,17Z))	824.545	53.1	74.2	0.452397	91.8179	100 - 49.2 - 13.5 - 2.66 - 0.419	1	16.942	0.0010666	0.0788505	25.5417	V1 28	http://nonlinear.com/redirect/outbound?p=hmdb&param=YMDB01855
16.94_824.5451m/z	YMDB01875		M+FA-H	C44H78NO8P	PC(16:1(9Z)/20:4(5Z,8Z,11Z,14Z))	824.545	52.3	70.1	0.452397	91.8179	100 - 49.2 - 13.5 - 2.66 - 0.419	1	16.942	0.0010666	0.0788505	25.5417	V1 28	http://nonlinear.com/redirect/outbound?p=hmdb&param=YMDB01875
16.94_824.5451m/z	YMDB01876		M+FA-H	C44H78NO8P	PC(16:1(9Z)/20:4(8Z,11Z,14Z,17Z))	824.545	53.3	75.3	0.452397	91.8179	100 - 49.2 - 13.5 - 2.66 - 0.419	1	16.942	0.0010666	0.0788505	25.5417	V1 28	http://nonlinear.com/redirect/outbound?p=hmdb&param=YMDB01876
16.94_824.5451m/z	YMDB01916		M+FA-H	C44H78NO8P	PC(18:1(11Z)/18:4(6Z,9Z,12Z,15Z))	824.545	53.4	76	0.452397	91.8179	100 - 49.2 - 13.5 - 2.66 - 0.419	1	16.942	0.0010666	0.0788505	25.5417	V1 28	http://nonlinear.com/redirect/outbound?p=hmdb&param=YMDB01916
16.94_824.5451m/z	YMDB01940		M+FA-H	C44H78NO8P	PC(18:1(9Z)/18:4(6Z,9Z,12Z,15Z))	824.545	53.4	76	0.452397	91.8179	100 - 49.2 - 13.5 - 2.66 - 0.419	1	16.942	0.0010666	0.0788505	25.5417	V1 28	http://nonlinear.com/redirect/outbound?p=hmdb&param=YMDB01940
16.94_824.5451m/z	YMDB01963		M+FA-H	C44H78NO8P	PC(18:2(9Z,12Z)/18:3(6Z,9Z,12Z))	824.545	52.3	70.1	0.452397	91.8179	100 - 49.2 - 13.5 - 2.66 - 0.419	1	16.942	0.0010666	0.0788505	25.5417	V1 28	http://nonlinear.com/redirect/outbound?p=hmdb&param=YMDB01963
16.94_824.5451m/z	YMDB01964		M+FA-H	C44H78NO8P	PC(18:2(9Z,12Z)/18:3(9Z,12Z,15Z))	824.545	53.3	75.3	0.452397	91.8179	100 - 49.2 - 13.5 - 2.66 - 0.419	1	16.942	0.0010666	0.0788505	25.5417	V1 28	http://nonlinear.com/redirect/outbound?p=hmdb&param=YMDB01964
16.94_824.5451m/z	YMDB01984		M+FA-H	C44H78NO8P	PC(18:3(6Z,9Z,12Z)/18:2(9Z,12Z))	824.545	52.3	70.1	0.452397	91.8179	100 - 49.2 - 13.5 - 2.66 - 0.419	1	16.942	0.0010666	0.0788505	25.5417	V1 28	http://nonlinear.com/redirect/outbound?p=hmdb&param=YMDB01984
16.94_824.5451m/z	YMDB02005		M+FA-H	C44H78NO8P	PC(18:3(9Z,12Z,15Z)/18:2(9Z,12Z))	824.545	53.3	75.3	0.452397	91.8179	100 - 49.2 - 13.5 - 2.66 - 0.419	1	16.942	0.0010666	0.0788505	25.5417	V1 28	http://nonlinear.com/redirect/outbound?p=hmdb&param=YMDB02005
16.94_824.5451m/z	YMDB02023		M+FA-H	C44H78NO8P	PC(18:4(6Z,9Z,12Z,15Z)/18:1(11Z))	824.545	53.3	75.3	0.452397	91.8179	100 - 49.2 - 13.5 - 2.66 - 0.419	1	16.942	0.0010666	0.0788505	25.5417	V1 28	http://nonlinear.com/redirect/outbound?p=hmdb&param=YMDB02023
16.94_824.5451m/z	YMDB02024		M+FA-H	C44H78NO8P	PC(18:4(6Z,9Z,12Z,15Z)/18:1(9Z))	824.545	53.3	75.3	0.452397	91.8179	100 - 49.2 - 13.5 - 2.66 - 0.419	1	16.942	0.0010666	0.0788505	25.5417	V1 28	http://nonlinear.com/redirect/outbound?p=hmdb&param=YMDB02024
16.94_824.5451m/z	YMDB02123		M+FA-H	C44H78NO8P	PC(20:4(5Z,8Z,11Z,14Z)/16:1(9Z))	824.545	52.3	70.1	0.452397	91.8179	100 - 49.2 - 13.5 - 2.66 - 0.419	1	16.942	0.0010666	0.0788505	25.5417	V1 28	http://nonlinear.com/redirect/outbound?p=hmdb&param=YMDB02123
16.94_824.5451m/z	YMDB02133		M+FA-H	C44H78NO8P	PC(20:4(8Z,11Z,14Z,17Z)/16:1(9Z))	824.545	53.3	75.3	0.452397	91.8179	100 - 49.2 - 13.5 - 2.66 - 0.419	1	16.942	0.0010666	0.0788505	25.5417	V1 28	http://nonlinear.com/redirect/outbound?p=hmdb&param=YMDB02133
16.94_824.5451m/z	YMDB02139		M+FA-H	C44H78NO8P	PC(20:5(5Z,8Z,11Z,14Z,17Z)/16:0)	824.545	53.1	74.2	0.452397	91.8179	100 - 49.2 - 13.5 - 2.66 - 0.419	1	16.942	0.0010666	0.0788505	25.5417	V1 28	http://nonlinear.com/redirect/outbound?p=hmdb&param=YMDB02139
16.94_824.5451m/z	YMDB02183		M+FA-H	C44H78NO8P	PC(22:4(7Z,10Z,13Z,16Z)/14:1(9Z))	824.545	52.3	70.1	0.452397	91.8179	100 - 49.2 - 13.5 - 2.66 - 0.419	1	16.942	0.0010666	0.0788505	25.5417	V1 28	http://nonlinear.com/redirect/outbound?p=hmdb&param=YMDB02183
16.94_824.5451m/z	YMDB02190		M+FA-H	C44H78NO8P	PC(22:5(4Z,7Z,10Z,13Z,16Z)/14:0)	824.545	52.3	70.1	0.452397	91.8179	100 - 49.2 - 13.5 - 2.66 - 0.419	1	16.942	0.0010666	0.0788505	25.5417	V1 28	http://nonlinear.com/redirect/outbound?p=hmdb&param=YMDB02190
16.94_824.5451m/z	YMDB02192		M+FA-H	C44H78NO8P	PC(22:5(7Z,10Z,13Z,16Z,19Z)/14:0)	824.545	53.1	74.2	0.452397	91.8179	100 - 49.2 - 13.5 - 2.66 - 0.419	1	16.942	0.0010666	0.0788505	25.5417	V1 28	http://nonlinear.com/redirect/outbound?p=hmdb&param=YMDB02192
6.21_450.2627m/z	YMDB01201		M-H	C21H42NO7P	PE(16:1(9Z)/0:0)	450.263	46.7	40.8	0.220829	93.1039	100 - 23.8 - 4.15 - 0.539	1	6.20918	0.00469001	0.156214	19.8086	V1 28	http://nonlinear.com/redirect/outbound?p=hmdb&param=YMDB01201
6.21_452.2778m/z	YMDB01201		M+H	C21H42NO7P	PE(16:1(9Z)/0:0)	452.278	43.6	24.2	1.48711	95.4732	100 - 23.8 - 4.15 - 0.539	1	6.21035	0.00536027	0.24699	14.5225	V1 28	http://nonlinear.com/redirect/outbound?p=hmdb&param=YMDB01925
6.53_544.2665m/z	YMDB01258		M+Na-2H	C24H46NO9P	PS(18:1(9Z)/0:0)	544.267	44.9	36.8	1.55932	89.6693	100 - 27.2 - 5.41 - 0.8	1	6.53428	0.0202526	0.296548	12.4736	V1 28	http://nonlinear.com/redirect/outbound?p=hmdb&param=YMDB01258
16.96_831.5035m/z	YMDB01234		M+Na-2H	C41H79O13P	PI(16:0/16:0)	831.503	37.7	3.07	3.65273	89.7071	100 - 45.7 - 12.9 - 2.71 - 0.464	1	16.9591	0.0214354	0.300447	7.03237	V1 28	http://nonlinear.com/redirect/outbound?p=hmdb&param=YMDB01234
15.81_778.5396m/z	YMDB01826		M+H	C44H76NO8P	PC(14:0/22:6(4Z,7Z,10Z,13Z,16Z,19Z))	778.54	36.8	6	1.94011	80.288	100 - 49.1 - 13.5 - 2.66 - 0.419	1	15.8067	0.0382748	0.24699	6.39131	V1 28	http://nonlinear.com/redirect/outbound?p=hmdb&param=YMDB02116
15.81_778.5396m/z	YMDB01841		M+H	C44H76NO8P	PC(14:1(9Z)/22:5(4Z,7Z,10Z,13Z,16Z))	778.54	36.8	6	1.94011	80.288	100 - 49.1 - 13.5 - 2.66 - 0.419	1	15.8067	0.0382748	0.24699	6.39131	V1 28	http://nonlinear.com/redirect/outbound?p=hmdb&param=YMDB02128
15.81_778.5396m/z	YMDB01842		M+H	C44H76NO8P	PC(14:1(9Z)/22:5(7Z,10Z,13Z,16Z,19Z))	778.54	36.8	6	1.94011	80.288	100 - 49.1 - 13.5 - 2.66 - 0.419	1	15.8067	0.0382748	0.24699	6.39131	V1 28	http://nonlinear.com/redirect/outbound?p=hmdb&param=YMDB02137
15.81_778.5396m/z	YMDB01877		M+H	C44H76NO8P	PC(16:1(9Z)/20:5(5Z,8Z,11Z,14Z,17Z))	778.54	36.8	6	1.94011	80.288	100 - 49.1 - 13.5 - 2.66 - 0.419	1	15.8067	0.0382748	0.24699	6.39131	V1 28	http://nonlinear.com/redirect/outbound?p=hmdb&param=YMDB02143
15.81_778.5396m/z	YMDB01965		M+H	C44H76NO8P	PC(18:2(9Z,12Z)/18:4(6Z,9Z,12Z,15Z))	778.54	36.8	6	1.94011	80.288	100 - 49.1 - 13.5 - 2.66 - 0.419	1	15.8067	0.0382748	0.24699	6.39131	V1 28	http://nonlinear.com/redirect/outbound?p=hmdb&param=YMDB02162
15.81_778.5396m/z	YMDB01985		M+H	C44H76NO8P	PC(18:3(6Z,9Z,12Z)/18:3(6Z,9Z,12Z))	778.54	36.8	6	1.94011	80.288	100 - 49.1 - 13.5 - 2.66 - 0.419	1	15.8067	0.0382748	0.24699	6.39131	V1 28	http://nonlinear.com/redirect/outbound?p=hmdb&param=YMDB02176
15.81_778.5396m/z	YMDB01986		M+H	C44H76NO8P	PC(18:3(6Z,9Z,12Z)/18:3(9Z,12Z,15Z))	778.54	36.8	6	1.94011	80.288	100 - 49.1 - 13.5 - 2.66 - 0.419	1	15.8067	0.0382748	0.24699	6.39131	V1 28	http://nonlinear.com/redirect/outbound?p=hmdb&param=YMDB02177
15.81_778.5396m/z	YMDB02006		M+H	C44H76NO8P	PC(18:3(9Z,12Z,15Z)/18:3(6Z,9Z,12Z))	778.54	36.8	6	1.94011	80.288	100 - 49.1 - 13.5 - 2.66 - 0.419	1	15.8067	0.0382748	0.24699	6.39131	V1 28	http://nonlinear.com/redirect/outbound?p=hmdb&param=YMDB02185
15.81_778.5396m/z	YMDB02007		M+H	C44H76NO8P	PC(18:3(9Z,12Z,15Z)/18:3(9Z,12Z,15Z))	778.54	36.8	6	1.94011	80.288	100 - 49.1 - 13.5 - 2.66 - 0.419	1	15.8067	0.0382748	0.24699	6.39131	V1 28	http://nonlinear.com/redirect/outbound?p=hmdb&param=YMDB02186
15.81_778.5396m/z	YMDB02025		M+H	C44H76NO8P	PC(18:4(6Z,9Z,12Z,15Z)/18:2(9Z,12Z))	778.54	36.8	6	1.94011	80.288	100 - 49.1 - 13.5 - 2.66 - 0.419	1	15.8067	0.0382748	0.24699	6.39131	V1 28	http://nonlinear.com/redirect/outbound?p=hmdb&param=YMDB01252
15.81_778.5396m/z	YMDB02140		M+H	C44H76NO8P	PC(20:5(5Z,8Z,11Z,14Z,17Z)/16:1(9Z))	778.54	36.8	6	1.94011	80.288	100 - 49.1 - 13.5 - 2.66 - 0.419	1	15.8067	0.0382748	0.24699	6.39131	V1 28	http://nonlinear.com/redirect/outbound?p=hmdb&param=YMDB01201
15.81_778.5396m/z	YMDB02191		M+H	C44H76NO8P	PC(22:5(4Z,7Z,10Z,13Z,16Z)/14:1(9Z))	778.54	36.8	6	1.94011	80.288	100 - 49.1 - 13.5 - 2.66 - 0.419	1	15.8067	0.0382748	0.24699	6.39131	V1 28	http://nonlinear.com/redirect/outbound?p=hmdb&param=YMDB01185
15.81_778.5396m/z	YMDB02193		M+H	C44H76NO8P	PC(22:5(7Z,10Z,13Z,16Z,19Z)/14:1(9Z))	778.54	36.8	6	1.94011	80.288	100 - 49.1 - 13.5 - 2.66 - 0.419	1	15.8067	0.0382748	0.24699	6.39131	V1 28	http://nonlinear.com/redirect/outbound?p=hmdb&param=YMDB01165
15.81_778.5396m/z	YMDB02194		M+H	C44H76NO8P	PC(22:6(4Z,7Z,10Z,13Z,16Z,19Z)/14:0)	778.54	36.8	6	1.94011	80.288	100 - 49.1 - 13.5 - 2.66 - 0.419	1	15.8067	0.0382748	0.24699	6.39131	V1 28	http://nonlinear.com/redirect/outbound?p=hmdb&param=YMDB01199
6.88_544.2660m/z	YMDB01258		M+Na-2H	C24H46NO9P	PS(18:1(9Z)/0:0)	544.266	46.2	40.1	0.674085	91.7	100 - 27.2 - 5.41 - 0.8	1	6.87645	0.0494361	0.465344	5.75782	V1 28	http://nonlinear.com/redirect/outbound?p=hmdb&param=YMDB01258
7.65_544.3382m/z	YMDB02213		M+H	C28H50NO7P	LysoPC(20:4(5Z,8Z,11Z,14Z))	544.338	43.7	29.6	-2.86402	92.0692	100 - 31.5 - 6.23 - 0.922 - 0.111	1	7.65488	0.0371506	0.24699	4.70855	V1 28	http://nonlinear.com/redirect/outbound?p=hmdb&param=YMDB01831
7.65_544.3382m/z	YMDB02214		M+H	C28H50NO7P	LysoPC(20:4(8Z,11Z,14Z,17Z))	544.338	43	26.1	-2.86402	92.0692	100 - 31.5 - 6.23 - 0.922 - 0.111	1	7.65488	0.0371506	0.24699	4.70855	V1 28	http://nonlinear.com/redirect/outbound?p=hmdb&param=YMDB01864
7.65_522.3561m/z	YMDB01190		M+H	C26H52NO7P	PC(18:1(9Z)/0:0)	522.356	44	24	1.30011	97.5178	100 - 29.4 - 5.59 - 0.799	1	7.65488	0.0427585	0.24699	3.95008	V1 28	http://nonlinear.com/redirect/outbound?p=hmdb&param=YMDB01202
7.65_522.3561m/z	YMDB01810		M+H	C26H52NO7P	LysoPC(18:1(9Z))	522.356	44	24	1.30011	97.5178	100 - 29.4 - 5.59 - 0.799	1	7.65488	0.0427585	0.24699	3.95008	V1 28	http://nonlinear.com/redirect/outbound?p=hmdb&param=YMDB01222
7.65_522.3561m/z	YMDB02211		M+H	C26H52NO7P	LysoPC(18:1(11Z))	522.356	44	24	1.30011	97.5178	100 - 29.4 - 5.59 - 0.799	1	7.65488	0.0427585	0.24699	3.95008	V1 28	http://nonlinear.com/redirect/outbound?p=hmdb&param=YMDB01226
16.94_780.5558m/z	YMDB01824		M+H	C44H78NO8P	PC(14:0/22:5(4Z,7Z,10Z,13Z,16Z))	780.556	37.6	12.1	2.54738	78.79	100 - 49.2 - 13.5 - 2.66 - 0.419	1	16.9433	0.0173843	0.24699	2.75804	V1 28	http://nonlinear.com/redirect/outbound?p=hmdb&param=YMDB01200
16.94_780.5558m/z	YMDB01825		M+H	C44H78NO8P	PC(14:0/22:5(7Z,10Z,13Z,16Z,19Z))	780.556	39.3	20.8	2.54738	78.79	100 - 49.2 - 13.5 - 2.66 - 0.419	1	16.9433	0.0173843	0.24699	2.75804	V1 28	http://nonlinear.com/redirect/outbound?p=hmdb&param=YMDB01205
16.94_780.5558m/z	YMDB01840		M+H	C44H78NO8P	PC(14:1(9Z)/22:4(7Z,10Z,13Z,16Z))	780.556	37.6	12.1	2.54738	78.79	100 - 49.2 - 13.5 - 2.66 - 0.419	1	16.9433	0.0173843	0.24699	2.75804	V1 28	http://nonlinear.com/redirect/outbound?p=hmdb&param=YMDB01204
16.94_780.5558m/z	YMDB01855		M+H	C44H78NO8P	PC(16:0/20:5(5Z,8Z,11Z,14Z,17Z))	780.556	39.3	20.8	2.54738	78.79	100 - 49.2 - 13.5 - 2.66 - 0.419	1	16.9433	0.0173843	0.24699	2.75804	V1 28	http://nonlinear.com/redirect/outbound?p=hmdb&param=YMDB01713
16.94_780.5558m/z	YMDB01875		M+H	C44H78NO8P	PC(16:1(9Z)/20:4(5Z,8Z,11Z,14Z))	780.556	37.6	12.1	2.54738	78.79	100 - 49.2 - 13.5 - 2.66 - 0.419	1	16.9433	0.0173843	0.24699	2.75804	V1 28	http://nonlinear.com/redirect/outbound?p=hmdb&param=YMDB01300
16.94_780.5558m/z	YMDB01876		M+H	C44H78NO8P	PC(16:1(9Z)/20:4(8Z,11Z,14Z,17Z))	780.556	39.3	20.8	2.54738	78.79	100 - 49.2 - 13.5 - 2.66 - 0.419	1	16.9433	0.0173843	0.24699	2.75804	V1 28	http://nonlinear.com/redirect/outbound?p=hmdb&param=YMDB01824
16.94_780.5558m/z	YMDB01916		M+H	C44H78NO8P	PC(18:1(11Z)/18:4(6Z,9Z,12Z,15Z))	780.556	39.3	20.8	2.54738	78.79	100 - 49.2 - 13.5 - 2.66 - 0.419	1	16.9433	0.0173843	0.24699	2.75804	V1 28	http://nonlinear.com/redirect/outbound?p=hmdb&param=YMDB01825
16.94_780.5558m/z	YMDB01940		M+H	C44H78NO8P	PC(18:1(9Z)/18:4(6Z,9Z,12Z,15Z))	780.556	39.3	20.8	2.54738	78.79	100 - 49.2 - 13.5 - 2.66 - 0.419	1	16.9433	0.0173843	0.24699	2.75804	V1 28	http://nonlinear.com/redirect/outbound?p=hmdb&param=YMDB01840
16.94_780.5558m/z	YMDB01963		M+H	C44H78NO8P	PC(18:2(9Z,12Z)/18:3(6Z,9Z,12Z))	780.556	37.9	13.9	2.54738	78.79	100 - 49.2 - 13.5 - 2.66 - 0.419	1	16.9433	0.0173843	0.24699	2.75804	V1 28	http://nonlinear.com/redirect/outbound?p=hmdb&param=YMDB01855
16.94_780.5558m/z	YMDB01964		M+H	C44H78NO8P	PC(18:2(9Z,12Z)/18:3(9Z,12Z,15Z))	780.556	39.7	22.5	2.54738	78.79	100 - 49.2 - 13.5 - 2.66 - 0.419	1	16.9433	0.0173843	0.24699	2.75804	V1 28	http://nonlinear.com/redirect/outbound?p=hmdb&param=YMDB01875
16.94_780.5558m/z	YMDB01984		M+H	C44H78NO8P	PC(18:3(6Z,9Z,12Z)/18:2(9Z,12Z))	780.556	37.9	13.9	2.54738	78.79	100 - 49.2 - 13.5 - 2.66 - 0.419	1	16.9433	0.0173843	0.24699	2.75804	V1 28	http://nonlinear.com/redirect/outbound?p=hmdb&param=YMDB01876
16.94_780.5558m/z	YMDB02005		M+H	C44H78NO8P	PC(18:3(9Z,12Z,15Z)/18:2(9Z,12Z))	780.556	39.7	22.5	2.54738	78.79	100 - 49.2 - 13.5 - 2.66 - 0.419	1	16.9433	0.0173843	0.24699	2.75804	V1 28	http://nonlinear.com/redirect/outbound?p=hmdb&param=YMDB01916
16.94_780.5558m/z	YMDB02023		M+H	C44H78NO8P	PC(18:4(6Z,9Z,12Z,15Z)/18:1(11Z))	780.556	39.3	20.8	2.54738	78.79	100 - 49.2 - 13.5 - 2.66 - 0.419	1	16.9433	0.0173843	0.24699	2.75804	V1 28	http://nonlinear.com/redirect/outbound?p=hmdb&param=YMDB01940
16.94_780.5558m/z	YMDB02024		M+H	C44H78NO8P	PC(18:4(6Z,9Z,12Z,15Z)/18:1(9Z))	780.556	39.3	20.8	2.54738	78.79	100 - 49.2 - 13.5 - 2.66 - 0.419	1	16.9433	0.0173843	0.24699	2.75804	V1 28	http://nonlinear.com/redirect/outbound?p=hmdb&param=YMDB01963
16.94_780.5558m/z	YMDB02123		M+H	C44H78NO8P	PC(20:4(5Z,8Z,11Z,14Z)/16:1(9Z))	780.556	37.6	12.1	2.54738	78.79	100 - 49.2 - 13.5 - 2.66 - 0.419	1	16.9433	0.0173843	0.24699	2.75804	V1 28	http://nonlinear.com/redirect/outbound?p=hmdb&param=YMDB01964
16.94_780.5558m/z	YMDB02133		M+H	C44H78NO8P	PC(20:4(8Z,11Z,14Z,17Z)/16:1(9Z))	780.556	39.3	20.8	2.54738	78.79	100 - 49.2 - 13.5 - 2.66 - 0.419	1	16.9433	0.0173843	0.24699	2.75804	V1 28	http://nonlinear.com/redirect/outbound?p=hmdb&param=YMDB01984
16.94_780.5558m/z	YMDB02139		M+H	C44H78NO8P	PC(20:5(5Z,8Z,11Z,14Z,17Z)/16:0)	780.556	39.3	20.8	2.54738	78.79	100 - 49.2 - 13.5 - 2.66 - 0.419	1	16.9433	0.0173843	0.24699	2.75804	V1 28	http://nonlinear.com/redirect/outbound?p=hmdb&param=YMDB02005
16.94_780.5558m/z	YMDB02183		M+H	C44H78NO8P	PC(22:4(7Z,10Z,13Z,16Z)/14:1(9Z))	780.556	37.6	12.1	2.54738	78.79	100 - 49.2 - 13.5 - 2.66 - 0.419	1	16.9433	0.0173843	0.24699	2.75804	V1 28	http://nonlinear.com/redirect/outbound?p=hmdb&param=YMDB02023
16.94_780.5558m/z	YMDB02190		M+H	C44H78NO8P	PC(22:5(4Z,7Z,10Z,13Z,16Z)/14:0)	780.556	37.6	12.1	2.54738	78.79	100 - 49.2 - 13.5 - 2.66 - 0.419	1	16.9433	0.0173843	0.24699	2.75804	V1 28	http://nonlinear.com/redirect/outbound?p=hmdb&param=YMDB02024
16.94_780.5558m/z	YMDB02192		M+H	C44H78NO8P	PC(22:5(7Z,10Z,13Z,16Z,19Z)/14:0)	780.556	39.3	20.8	2.54738	78.79	100 - 49.2 - 13.5 - 2.66 - 0.419	1	16.9433	0.0173843	0.24699	2.75804	V1 28	http://nonlinear.com/redirect/outbound?p=hmdb&param=YMDB02123
(B) HIGHEST IN 1718
16.39_730.4681m/z	YMDB01254		M-H	C38H70NO10P	PS(16:1(9Z)/16:1(9Z))	730.468	35.7	1.5	2.28367	79.8194	100 - 42.7 - 10.9 - 2.08 - 0.32	1	16.3944	0.00466362	0.156214	Infinity	YL	http://nonlinear.com/redirect/outbound?p=hmdb&param=YMDB01254
16.55_760.5147m/z	YMDB01203		M+FA-H	C39H74NO8P	PE(16:1(9Z)/18:1(9Z))	760.515	39.6	17.8	1.84743	82.3908	100 - 43.7 - 11 - 2.01 - 0.296	1	16.5484	0.0178227	0.286083	Infinity	YL	http://nonlinear.com/redirect/outbound?p=hmdb&param=YMDB01203
16.55_760.5147m/z	YMDB01253		M-H	C40H76NO10P	PS(16:0/18:1(9Z))	760.515	38.4	13.1	1.73582	81.102	100 - 44.9 - 11.9 - 2.32 - 0.367	1	16.5484	0.0178227	0.286083	Infinity	YL	http://nonlinear.com/redirect/outbound?p=hmdb&param=YMDB01253
17.31_660.4620m/z	YMDB01195		M-H	C35H68NO8P	PE(14:0/16:1(9Z))	660.462	37.9	0.967	1.61822	90.3718	100 - 39.3 - 9.16 - 1.58 - 0.22	1	17.3089	0.000151552	0.0473512	Infinity	YL	http://nonlinear.com/redirect/outbound?p=hmdb&param=YMDB01195
17.31_660.4620m/z	YMDB01196		M-H	C35H68NO8P	PE(14:1(9Z)/16:0)	660.462	38.2	2.35	1.61822	90.3718	100 - 39.3 - 9.16 - 1.58 - 0.22	1	17.3089	0.000151552	0.0473512	Infinity	YL	http://nonlinear.com/redirect/outbound?p=hmdb&param=YMDB01196
17.53_748.5156m/z	YMDB01177		M+FA-H	C38H74NO8P	PC(14:0/16:1(9Z))	748.516	36.3	0	3.09199	85.0219	100 - 42.6 - 10.5 - 1.9 - 0.275	1	17.5313	0.000766253	0.0703792	Infinity	YL	http://nonlinear.com/redirect/outbound?p=hmdb&param=YMDB01177
17.53_826.5334m/z	YMDB01859		M+Na-2H	C46H80NO8P	PC(16:0/22:6(4Z,7Z,10Z,13Z,16Z,19Z))	826.533	35.3	5.01	-4.26746	76.6375	100 - 51.3 - 14.6 - 2.96 - 0.479	1	17.5313	0.00364636	0.147144	Infinity	YL	http://nonlinear.com/redirect/outbound?p=hmdb&param=YMDB01859
17.53_826.5334m/z	YMDB01880		M+Na-2H	C46H80NO8P	PC(16:1(9Z)/22:5(4Z,7Z,10Z,13Z,16Z))	826.533	35	3.53	-4.26746	76.6375	100 - 51.3 - 14.6 - 2.96 - 0.479	1	17.5313	0.00364636	0.147144	Infinity	YL	http://nonlinear.com/redirect/outbound?p=hmdb&param=YMDB01880
17.53_826.5334m/z	YMDB01881		M+Na-2H	C46H80NO8P	PC(16:1(9Z)/22:5(7Z,10Z,13Z,16Z,19Z))	826.533	35.3	5.01	-4.26746	76.6375	100 - 51.3 - 14.6 - 2.96 - 0.479	1	17.5313	0.00364636	0.147144	Infinity	YL	http://nonlinear.com/redirect/outbound?p=hmdb&param=YMDB01881
17.53_826.5334m/z	YMDB01922		M+Na-2H	C46H80NO8P	PC(18:1(11Z)/20:5(5Z,8Z,11Z,14Z,17Z))	826.533	35.3	4.89	-4.26746	76.6375	100 - 51.3 - 14.6 - 2.96 - 0.479	1	17.5313	0.00364636	0.147144	Infinity	YL	http://nonlinear.com/redirect/outbound?p=hmdb&param=YMDB01922
17.53_826.5334m/z	YMDB01946		M+Na-2H	C46H80NO8P	PC(18:1(9Z)/20:5(5Z,8Z,11Z,14Z,17Z))	826.533	35.3	4.89	-4.26746	76.6375	100 - 51.3 - 14.6 - 2.96 - 0.479	1	17.5313	0.00364636	0.147144	Infinity	YL	http://nonlinear.com/redirect/outbound?p=hmdb&param=YMDB01946
17.53_826.5334m/z	YMDB01969		M+Na-2H	C46H80NO8P	PC(18:2(9Z,12Z)/20:4(5Z,8Z,11Z,14Z))	826.533	34.9	2.81	-4.26746	76.6375	100 - 51.3 - 14.6 - 2.96 - 0.479	1	17.5313	0.00364636	0.147144	Infinity	YL	http://nonlinear.com/redirect/outbound?p=hmdb&param=YMDB01969
17.53_826.5334m/z	YMDB01970		M+Na-2H	C46H80NO8P	PC(18:2(9Z,12Z)/20:4(8Z,11Z,14Z,17Z))	826.533	35.2	4.28	-4.26746	76.6375	100 - 51.3 - 14.6 - 2.96 - 0.479	1	17.5313	0.00364636	0.147144	Infinity	YL	http://nonlinear.com/redirect/outbound?p=hmdb&param=YMDB01970
17.53_826.5334m/z	YMDB01990		M+Na-2H	C46H80NO8P	PC(18:3(6Z,9Z,12Z)/20:3(5Z,8Z,11Z))	826.533	34.9	2.81	-4.26746	76.6375	100 - 51.3 - 14.6 - 2.96 - 0.479	1	17.5313	0.00364636	0.147144	Infinity	YL	http://nonlinear.com/redirect/outbound?p=hmdb&param=YMDB01990
17.53_826.5334m/z	YMDB01991		M+Na-2H	C46H80NO8P	PC(18:3(6Z,9Z,12Z)/20:3(8Z,11Z,14Z))	826.533	34.9	2.81	-4.26746	76.6375	100 - 51.3 - 14.6 - 2.96 - 0.479	1	17.5313	0.00364636	0.147144	Infinity	YL	http://nonlinear.com/redirect/outbound?p=hmdb&param=YMDB01991
17.53_826.5334m/z	YMDB02011		M+Na-2H	C46H80NO8P	PC(18:3(9Z,12Z,15Z)/20:3(5Z,8Z,11Z))	826.533	35.2	4.28	-4.26746	76.6375	100 - 51.3 - 14.6 - 2.96 - 0.479	1	17.5313	0.00364636	0.147144	Infinity	YL	http://nonlinear.com/redirect/outbound?p=hmdb&param=YMDB02011
17.53_826.5334m/z	YMDB02012		M+Na-2H	C46H80NO8P	PC(18:3(9Z,12Z,15Z)/20:3(8Z,11Z,14Z))	826.533	35.2	4.28	-4.26746	76.6375	100 - 51.3 - 14.6 - 2.96 - 0.479	1	17.5313	0.00364636	0.147144	Infinity	YL	http://nonlinear.com/redirect/outbound?p=hmdb&param=YMDB02012
17.53_826.5334m/z	YMDB02028		M+Na-2H	C46H80NO8P	PC(18:4(6Z,9Z,12Z,15Z)/20:2(11Z,14Z))	826.533	35.3	4.59	-4.26746	76.6375	100 - 51.3 - 14.6 - 2.96 - 0.479	1	17.5313	0.00364636	0.147144	Infinity	YL	http://nonlinear.com/redirect/outbound?p=hmdb&param=YMDB02028
17.53_826.5334m/z	YMDB02076		M+Na-2H	C46H80NO8P	PC(20:2(11Z,14Z)/18:4(6Z,9Z,12Z,15Z))	826.533	35.2	4.39	-4.26746	76.6375	100 - 51.3 - 14.6 - 2.96 - 0.479	1	17.5313	0.00364636	0.147144	Infinity	YL	http://nonlinear.com/redirect/outbound?p=hmdb&param=YMDB02076
17.53_826.5334m/z	YMDB02095		M+Na-2H	C46H80NO8P	PC(20:3(5Z,8Z,11Z)/18:3(6Z,9Z,12Z))	826.533	34.9	2.81	-4.26746	76.6375	100 - 51.3 - 14.6 - 2.96 - 0.479	1	17.5313	0.00364636	0.147144	Infinity	YL	http://nonlinear.com/redirect/outbound?p=hmdb&param=YMDB02095
17.53_826.5334m/z	YMDB02096		M+Na-2H	C46H80NO8P	PC(20:3(5Z,8Z,11Z)/18:3(9Z,12Z,15Z))	826.533	35.2	4.28	-4.26746	76.6375	100 - 51.3 - 14.6 - 2.96 - 0.479	1	17.5313	0.00364636	0.147144	Infinity	YL	http://nonlinear.com/redirect/outbound?p=hmdb&param=YMDB02096
17.53_826.5334m/z	YMDB02113		M+Na-2H	C46H80NO8P	PC(20:3(8Z,11Z,14Z)/18:3(6Z,9Z,12Z))	826.533	34.9	2.81	-4.26746	76.6375	100 - 51.3 - 14.6 - 2.96 - 0.479	1	17.5313	0.00364636	0.147144	Infinity	YL	http://nonlinear.com/redirect/outbound?p=hmdb&param=YMDB02113
17.53_826.5334m/z	YMDB02114		M+Na-2H	C46H80NO8P	PC(20:3(8Z,11Z,14Z)/18:3(9Z,12Z,15Z))	826.533	35.2	4.28	-4.26746	76.6375	100 - 51.3 - 14.6 - 2.96 - 0.479	1	17.5313	0.00364636	0.147144	Infinity	YL	http://nonlinear.com/redirect/outbound?p=hmdb&param=YMDB02114
17.53_826.5334m/z	YMDB02126		M+Na-2H	C46H80NO8P	PC(20:4(5Z,8Z,11Z,14Z)/18:2(9Z,12Z))	826.533	34.9	2.81	-4.26746	76.6375	100 - 51.3 - 14.6 - 2.96 - 0.479	1	17.5313	0.00364636	0.147144	Infinity	YL	http://nonlinear.com/redirect/outbound?p=hmdb&param=YMDB02126
17.53_826.5334m/z	YMDB02135		M+Na-2H	C46H80NO8P	PC(20:4(8Z,11Z,14Z,17Z)/18:2(9Z,12Z))	826.533	35.2	4.28	-4.26746	76.6375	100 - 51.3 - 14.6 - 2.96 - 0.479	1	17.5313	0.00364636	0.147144	Infinity	YL	http://nonlinear.com/redirect/outbound?p=hmdb&param=YMDB02135
17.53_826.5334m/z	YMDB02141		M+Na-2H	C46H80NO8P	PC(20:5(5Z,8Z,11Z,14Z,17Z)/18:1(11Z))	826.533	35.3	4.89	-4.26746	76.6375	100 - 51.3 - 14.6 - 2.96 - 0.479	1	17.5313	0.00364636	0.147144	Infinity	YL	http://nonlinear.com/redirect/outbound?p=hmdb&param=YMDB02141
17.53_826.5334m/z	YMDB02142		M+Na-2H	C46H80NO8P	PC(20:5(5Z,8Z,11Z,14Z,17Z)/18:1(9Z))	826.533	35.3	4.89	-4.26746	76.6375	100 - 51.3 - 14.6 - 2.96 - 0.479	1	17.5313	0.00364636	0.147144	Infinity	YL	http://nonlinear.com/redirect/outbound?p=hmdb&param=YMDB02142
17.84_762.5303m/z	YMDB01200		M+FA-H	C39H76NO8P	PE(16:0/18:1(9Z))	762.53	44.8	37.6	1.72283	88.443	100 - 43.7 - 11 - 2.01 - 0.296	1	17.8393	0.0007241	0.0703792	Infinity	YL	http://nonlinear.com/redirect/outbound?p=hmdb&param=YMDB01200
17.84_762.5303m/z	YMDB01205		M+FA-H	C39H76NO8P	PE(18:0/16:1(9Z))	762.53	44.8	37.7	1.72283	88.443	100 - 43.7 - 11 - 2.01 - 0.296	1	17.8393	0.0007241	0.0703792	Infinity	YL	http://nonlinear.com/redirect/outbound?p=hmdb&param=YMDB01205
18.17_674.4782m/z	YMDB01174		M-H	C36H70NO8P	PC(12:0/16:1(9Z))	674.478	37.1	0	2.26954	88.1746	100 - 40.4 - 9.6 - 1.68 - 0.237	1	18.1714	0.00191616	0.107553	Infinity	YL	http://nonlinear.com/redirect/outbound?p=hmdb&param=YMDB01174
18.17_674.4782m/z	YMDB01811		M-H	C36H70NO8P	PC(14:0/14:1(9Z))	674.478	37.1	0	2.26954	88.1746	100 - 40.4 - 9.6 - 1.68 - 0.237	1	18.1714	0.00191616	0.107553	Infinity	YL	http://nonlinear.com/redirect/outbound?p=hmdb&param=YMDB01811
18.17_674.4782m/z	YMDB01830		M-H	C36H70NO8P	PC(14:1(9Z)/14:0)	674.478	37.1	0	2.26954	88.1746	100 - 40.4 - 9.6 - 1.68 - 0.237	1	18.1714	0.00191616	0.107553	Infinity	YL	http://nonlinear.com/redirect/outbound?p=hmdb&param=YMDB01830
19.03_756.4817m/z	YMDB01251		M+Na-2H	C38H74NO10P	PS(16:0/16:0)	756.482	45.9	46.3	2.672	86.5459	100 - 42.7 - 10.9 - 2.08 - 0.32	1	19.0346	0.00544352	0.164993	Infinity	YL	http://nonlinear.com/redirect/outbound?p=hmdb&param=YMDB01251
16.26_824.5299m/z	YMDB01238		M+NH4	C41H75O13P	PI(16:1(9Z)/16:1(9Z))	824.53	36.6	8.43	1.86696	76.6042	100 - 45.7 - 12.9 - 2.7 - 0.463	1	16.2586	4.64584e-06	0.0299022	14055.9	YL	http://nonlinear.com/redirect/outbound?p=hmdb&param=YMDB01238
18.99_688.4931m/z	YMDB01199		M-H	C37H72NO8P	PE(16:0/16:1(9Z))	688.493	37.6	0	1.14805	89.3491	100 - 41.5 - 10 - 1.79 - 0.256	1	18.9936	0.00149743	0.0953015	383.245	YL	http://nonlinear.com/redirect/outbound?p=hmdb&param=YMDB01199
15.60_746.4991m/z	YMDB01178		M+FA-H	C38H72NO8P	PC(14:1(9Z)/16:1(9Z))	746.499	40.9	18.9	1.8875	87.9261	100 - 42.6 - 10.5 - 1.89 - 0.275	1	15.6004	0.00210043	0.111692	338.932	YL	http://nonlinear.com/redirect/outbound?p=hmdb&param=YMDB01178
15.60_746.4991m/z	YMDB01863		M+FA-H	C38H72NO8P	PC(16:1(9Z)/14:1(9Z))	746.499	40.9	18.8	1.8875	87.9261	100 - 42.6 - 10.5 - 1.89 - 0.275	1	15.6004	0.00210043	0.111692	338.932	YL	http://nonlinear.com/redirect/outbound?p=hmdb&param=YMDB01863
20.05_555.5232n	YMDB01102		M-H, M+FA-H	C34H69NO4	Cer 18:0;3/16:0;0	600.521	38.1	0	1.0011	91.545	100 - 38.1 - 7.87 - 1.16 - 0.134	1	20.0512	0.00116889	0.0823934	137.978	YL	http://nonlinear.com/redirect/outbound?p=hmdb&param=YMDB01102
17.45_714.5097m/z	YMDB01203		M-H	C39H74NO8P	PE(16:1(9Z)/18:1(9Z))	714.51	37	0	2.41167	87.6617	100 - 43.7 - 11 - 2.01 - 0.296	1	17.4458	0.0309344	0.355466	108.023	YL	http://nonlinear.com/redirect/outbound?p=hmdb&param=YMDB01203
16.26_807.5038m/z	YMDB01238		M+H	C41H75O13P	PI(16:1(9Z)/16:1(9Z))	807.504	35.9	6.75	2.45326	75.6316	100 - 45.7 - 12.9 - 2.7 - 0.463	1	16.2586	0.000118116	0.131295	95.6993	YL	http://nonlinear.com/redirect/outbound?p=hmdb&param=YMDB01903
17.55_754.4659m/z	YMDB01252		M+Na-2H	C38H72NO10P	PS(16:0/16:1(9Z))	754.466	39.7	22	2.49218	79.5624	100 - 42.7 - 10.9 - 2.08 - 0.32	1	17.5484	0.000749841	0.0703792	91.115	YL	http://nonlinear.com/redirect/outbound?p=hmdb&param=YMDB01252
18.68_776.5453m/z	YMDB01181		M+FA-H	C40H78NO8P	PC(16:0/16:1(9Z))	776.545	49.4	57.9	0.850515	89.9646	100 - 44.8 - 11.5 - 2.13 - 0.319	1	18.6849	0.0133475	0.248198	66.4885	YL	http://nonlinear.com/redirect/outbound?p=hmdb&param=YMDB01181
18.68_776.5453m/z	YMDB01813		M+FA-H	C40H78NO8P	PC(14:0/18:1(11Z))	776.545	49.4	57.9	0.850515	89.9646	100 - 44.8 - 11.5 - 2.13 - 0.319	1	18.6849	0.0133475	0.248198	66.4885	YL	http://nonlinear.com/redirect/outbound?p=hmdb&param=YMDB01813
18.68_776.5453m/z	YMDB01814		M+FA-H	C40H78NO8P	PC(14:0/18:1(9Z))	776.545	49.4	57.9	0.850515	89.9646	100 - 44.8 - 11.5 - 2.13 - 0.319	1	18.6849	0.0133475	0.248198	66.4885	YL	http://nonlinear.com/redirect/outbound?p=hmdb&param=YMDB01814
18.68_776.5453m/z	YMDB01831		M+FA-H	C40H78NO8P	PC(14:1(9Z)/18:0)	776.545	49.4	57.9	0.850515	89.9646	100 - 44.8 - 11.5 - 2.13 - 0.319	1	18.6849	0.0133475	0.248198	66.4885	YL	http://nonlinear.com/redirect/outbound?p=hmdb&param=YMDB01831
18.68_776.5453m/z	YMDB01864		M+FA-H	C40H78NO8P	PC(16:1(9Z)/16:0)	776.545	49.4	57.9	0.850515	89.9646	100 - 44.8 - 11.5 - 2.13 - 0.319	1	18.6849	0.0133475	0.248198	66.4885	YL	http://nonlinear.com/redirect/outbound?p=hmdb&param=YMDB01864
18.68_776.5453m/z	YMDB01888		M+FA-H	C40H78NO8P	PC(18:0/14:1(9Z))	776.545	49.4	57.9	0.850515	89.9646	100 - 44.8 - 11.5 - 2.13 - 0.319	1	18.6849	0.0133475	0.248198	66.4885	YL	http://nonlinear.com/redirect/outbound?p=hmdb&param=YMDB01888
18.68_776.5453m/z	YMDB01907		M+FA-H	C40H78NO8P	PC(18:1(11Z)/14:0)	776.545	49.4	57.9	0.850515	89.9646	100 - 44.8 - 11.5 - 2.13 - 0.319	1	18.6849	0.0133475	0.248198	66.4885	YL	http://nonlinear.com/redirect/outbound?p=hmdb&param=YMDB01907
18.68_776.5453m/z	YMDB01932		M+FA-H	C40H78NO8P	PC(18:1(9Z)/14:0)	776.545	49.4	57.9	0.850515	89.9646	100 - 44.8 - 11.5 - 2.13 - 0.319	1	18.6849	0.0133475	0.248198	66.4885	YL	http://nonlinear.com/redirect/outbound?p=hmdb&param=YMDB01932
16.98_748.5145m/z	YMDB01177		M+FA-H	C38H74NO8P	PC(14:0/16:1(9Z))	748.515	42.8	26.3	1.60788	89.5752	100 - 42.6 - 10.5 - 1.9 - 0.275	1	16.9762	0.0109994	0.225264	53.2331	YL	http://nonlinear.com/redirect/outbound?p=hmdb&param=YMDB01177
17.72_732.4840m/z	YMDB01202		M+FA-H	C37H70NO8P	PE(16:1(9Z)/16:1(9Z))	732.484	44.3	34.8	2.73452	89.801	100 - 41.5 - 10 - 1.78 - 0.255	1	17.7196	0.00411937	0.154146	50.9359	YL	http://nonlinear.com/redirect/outbound?p=hmdb&param=YMDB01202
17.72_732.4840m/z	YMDB01252		M-H	C38H72NO10P	PS(16:0/16:1(9Z))	732.484	44.2	35.8	2.56301	88.3955	100 - 42.7 - 10.9 - 2.08 - 0.32	1	17.7196	0.00411937	0.154146	50.9359	YL	http://nonlinear.com/redirect/outbound?p=hmdb&param=YMDB01252
19.43_786.5313m/z	YMDB01259		M-H	C42H78NO10P	PS(18:1(9Z)/18:1(9Z))	786.531	43.7	33.5	2.85521	88.1994	100 - 47.1 - 12.9 - 2.59 - 0.42	1	19.4282	0.0309611	0.355466	45.4035	YL	http://nonlinear.com/redirect/outbound?p=hmdb&param=YMDB01259
20.60_863.5662m/z	YMDB01242		M-H	C45H85O13P	PI(18:0/18:1(9Z))	863.566	37.5	1.73	0.858744	87.0202	100 - 50.1 - 15 - 3.31 - 0.593	1	20.5988	0.0246516	0.320683	27.1005	YL	http://nonlinear.com/redirect/outbound?p=hmdb&param=YMDB01242
19.39_714.5086m/z	YMDB01203		M-H	C39H74NO8P	PE(16:1(9Z)/18:1(9Z))	714.509	44.5	33.8	0.908724	89.6522	100 - 43.7 - 11 - 2.01 - 0.296	1	19.394	0.0101419	0.218016	25.6295	YL	http://nonlinear.com/redirect/outbound?p=hmdb&param=YMDB01203
16.26_805.4882m/z	YMDB01238		M-H	C41H75O13P	PI(16:1(9Z)/16:1(9Z))	805.488	37.1	0	1.11621	86.9473	100 - 45.7 - 12.9 - 2.7 - 0.463	1	16.2575	0.0166634	0.278025	23.9632	YL	http://nonlinear.com/redirect/outbound?p=hmdb&param=YMDB01238
20.50_716.5241m/z	YMDB01200		M-H	C39H76NO8P	PE(16:0/18:1(9Z))	716.524	47.5	49.7	0.716076	88.5833	100 - 43.7 - 11 - 2.01 - 0.296	1	20.4961	0.0187689	0.286083	20.5608	YL	http://nonlinear.com/redirect/outbound?p=hmdb&param=YMDB01200
20.50_716.5241m/z	YMDB01205		M-H	C39H76NO8P	PE(18:0/16:1(9Z))	716.524	43.1	27.9	0.716076	88.5833	100 - 43.7 - 11 - 2.01 - 0.296	1	20.4961	0.0187689	0.286083	20.5608	YL	http://nonlinear.com/redirect/outbound?p=hmdb&param=YMDB01205
20.21_744.5560m/z	YMDB01206		M-H	C41H80NO8P	PE(18:0/18:1(9Z))	744.556	37.7	4.32	1.45656	86.0844	100 - 45.9 - 12 - 2.26 - 0.342	1	20.2052	0.0237763	0.31333	20.1555	YL	http://nonlinear.com/redirect/outbound?p=hmdb&param=YMDB01206
19.46_790.5615m/z	YMDB01206		M+FA-H	C41H80NO8P	PE(18:0/18:1(9Z))	790.562	48.5	54.2	1.54192	89.8996	100 - 45.9 - 12 - 2.26 - 0.342	1	19.4625	0.0096273	0.216013	18.0288	YL	http://nonlinear.com/redirect/outbound?p=hmdb&param=YMDB01206
17.55_686.4774m/z	YMDB01202		M-H	C37H70NO8P	PE(16:1(9Z)/16:1(9Z))	686.477	38.9	6.09	1.05431	89.5587	100 - 41.5 - 10 - 1.78 - 0.255	1	17.5484	0.00164422	0.100226	17.7627	YL	http://nonlinear.com/redirect/outbound?p=hmdb&param=YMDB01202
16.84_786.5300m/z	YMDB01259		M-H	C42H78NO10P	PS(18:1(9Z)/18:1(9Z))	786.53	45.5	40.6	1.16239	88.0462	100 - 47.1 - 12.9 - 2.59 - 0.42	1	16.8393	0.0335096	0.370685	12.4967	YL	http://nonlinear.com/redirect/outbound?p=hmdb&param=YMDB01259
18.67_732.5536m/z	YMDB01181		M+H	C40H78NO8P	PC(16:0/16:1(9Z))	732.554	39.1	0	-0.262874	95.6179	100 - 44.8 - 11.5 - 2.13 - 0.319	1	18.6686	0.00885149	0.24699	11.8846	YL	http://nonlinear.com/redirect/outbound?p=hmdb&param=YMDB01949
18.67_732.5536m/z	YMDB01813		M+H	C40H78NO8P	PC(14:0/18:1(11Z))	732.554	39.1	0	-0.262874	95.6179	100 - 44.8 - 11.5 - 2.13 - 0.319	1	18.6686	0.00885149	0.24699	11.8846	YL	http://nonlinear.com/redirect/outbound?p=hmdb&param=YMDB01994
18.67_732.5536m/z	YMDB01814		M+H	C40H78NO8P	PC(14:0/18:1(9Z))	732.554	39.1	0	-0.262874	95.6179	100 - 44.8 - 11.5 - 2.13 - 0.319	1	18.6686	0.00885149	0.24699	11.8846	YL	http://nonlinear.com/redirect/outbound?p=hmdb&param=YMDB02015
18.67_732.5536m/z	YMDB01831		M+H	C40H78NO8P	PC(14:1(9Z)/18:0)	732.554	39.1	0	-0.262874	95.6179	100 - 44.8 - 11.5 - 2.13 - 0.319	1	18.6686	0.00885149	0.24699	11.8846	YL	http://nonlinear.com/redirect/outbound?p=hmdb&param=YMDB02030
18.67_732.5536m/z	YMDB01864		M+H	C40H78NO8P	PC(16:1(9Z)/16:0)	732.554	39.1	0	-0.262874	95.6179	100 - 44.8 - 11.5 - 2.13 - 0.319	1	18.6686	0.00885149	0.24699	11.8846	YL	http://nonlinear.com/redirect/outbound?p=hmdb&param=YMDB02046
18.67_732.5536m/z	YMDB01888		M+H	C40H78NO8P	PC(18:0/14:1(9Z))	732.554	39.1	0.424	-0.262874	95.6179	100 - 44.8 - 11.5 - 2.13 - 0.319	1	18.6686	0.00885149	0.24699	11.8846	YL	http://nonlinear.com/redirect/outbound?p=hmdb&param=YMDB02062
18.67_732.5536m/z	YMDB01907		M+H	C40H78NO8P	PC(18:1(11Z)/14:0)	732.554	39.1	0.415	-0.262874	95.6179	100 - 44.8 - 11.5 - 2.13 - 0.319	1	18.6686	0.00885149	0.24699	11.8846	YL	http://nonlinear.com/redirect/outbound?p=hmdb&param=YMDB02063
18.67_732.5536m/z	YMDB01932		M+H	C40H78NO8P	PC(18:1(9Z)/14:0)	732.554	39.1	0.415	-0.262874	95.6179	100 - 44.8 - 11.5 - 2.13 - 0.319	1	18.6686	0.00885149	0.24699	11.8846	YL	http://nonlinear.com/redirect/outbound?p=hmdb&param=YMDB02080
18.12_758.4985m/z	YMDB01255		M-H	C40H74NO10P	PS(16:1(9Z)/18:1(9Z))	758.499	50.3	64.3	1.03971	88.4384	100 - 44.9 - 11.9 - 2.32 - 0.367	1	18.1201	0.0184187	0.286083	11.0126	YL	http://nonlinear.com/redirect/outbound?p=hmdb&param=YMDB01255
20.21_804.5760m/z	YMDB01183		M+FA-H	C42H82NO8P	PC(16:0/18:1(9Z))	804.576	50.2	59.8	-0.0222733	91.322	100 - 47 - 12.5 - 2.39 - 0.367	1	20.2052	0.0141856	0.258865	8.88735	YL	http://nonlinear.com/redirect/outbound?p=hmdb&param=YMDB01183
20.21_804.5760m/z	YMDB01815		M+FA-H	C42H82NO8P	PC(14:0/20:1(11Z))	804.576	50.3	60	-0.0222733	91.322	100 - 47 - 12.5 - 2.39 - 0.367	1	20.2052	0.0141856	0.258865	8.88735	YL	http://nonlinear.com/redirect/outbound?p=hmdb&param=YMDB01815
20.21_804.5760m/z	YMDB01832		M+FA-H	C42H82NO8P	PC(14:1(9Z)/20:0)	804.576	50.3	60	-0.0222733	91.322	100 - 47 - 12.5 - 2.39 - 0.367	1	20.2052	0.0141856	0.258865	8.88735	YL	http://nonlinear.com/redirect/outbound?p=hmdb&param=YMDB01832
20.21_804.5760m/z	YMDB01844		M+FA-H	C42H82NO8P	PC(16:0/18:1(11Z))	804.576	50.2	59.8	-0.0222733	91.322	100 - 47 - 12.5 - 2.39 - 0.367	1	20.2052	0.0141856	0.258865	8.88735	YL	http://nonlinear.com/redirect/outbound?p=hmdb&param=YMDB01844
20.21_804.5760m/z	YMDB01865		M+FA-H	C42H82NO8P	PC(16:1(9Z)/18:0)	804.576	50.3	60.1	-0.0222733	91.322	100 - 47 - 12.5 - 2.39 - 0.367	1	20.2052	0.0141856	0.258865	8.88735	YL	http://nonlinear.com/redirect/outbound?p=hmdb&param=YMDB01865
20.21_804.5760m/z	YMDB01889		M+FA-H	C42H82NO8P	PC(18:0/16:1(9Z))	804.576	50.3	60.1	-0.0222733	91.322	100 - 47 - 12.5 - 2.39 - 0.367	1	20.2052	0.0141856	0.258865	8.88735	YL	http://nonlinear.com/redirect/outbound?p=hmdb&param=YMDB01889
20.21_804.5760m/z	YMDB01908		M+FA-H	C42H82NO8P	PC(18:1(11Z)/16:0)	804.576	50.2	59.8	-0.0222733	91.322	100 - 47 - 12.5 - 2.39 - 0.367	1	20.2052	0.0141856	0.258865	8.88735	YL	http://nonlinear.com/redirect/outbound?p=hmdb&param=YMDB01908
20.21_804.5760m/z	YMDB01933		M+FA-H	C42H82NO8P	PC(18:1(9Z)/16:0)	804.576	50.2	59.8	-0.0222733	91.322	100 - 47 - 12.5 - 2.39 - 0.367	1	20.2052	0.0141856	0.258865	8.88735	YL	http://nonlinear.com/redirect/outbound?p=hmdb&param=YMDB01933
20.21_804.5760m/z	YMDB02036		M+FA-H	C42H82NO8P	PC(20:0/14:1(9Z))	804.576	50.3	60	-0.0222733	91.322	100 - 47 - 12.5 - 2.39 - 0.367	1	20.2052	0.0141856	0.258865	8.88735	YL	http://nonlinear.com/redirect/outbound?p=hmdb&param=YMDB02036
20.21_804.5760m/z	YMDB02050		M+FA-H	C42H82NO8P	PC(20:1(11Z)/14:0)	804.576	50.3	60	-0.0222733	91.322	100 - 47 - 12.5 - 2.39 - 0.367	1	20.2052	0.0141856	0.258865	8.88735	YL	http://nonlinear.com/redirect/outbound?p=hmdb&param=YMDB02050
17.19_730.5399m/z	YMDB01185		M+H	C40H76NO8P	PC(16:1(9Z)/16:1(9Z))	730.54	38.2	0	2.41548	93.6301	100 - 44.8 - 11.4 - 2.13 - 0.318	1	17.1897	0.00600314	0.24699	8.21595	YL	http://nonlinear.com/redirect/outbound?p=hmdb&param=YMDB02099
20.62_742.5397m/z	YMDB01208		M-H	C41H78NO8P	PE(18:1(9Z)/18:1(9Z))	742.54	51.3	68.5	0.625443	88.7334	100 - 45.9 - 11.9 - 2.26 - 0.342	1	20.6159	0.0346191	0.379486	7.89355	YL	http://nonlinear.com/redirect/outbound?p=hmdb&param=YMDB01208
10.12_482.3252m/z	YMDB01204		M+H	C23H48NO7P	PE(18:0/0:0)	482.325	40.2	6.7	2.3332	96.8776	100 - 26.1 - 4.7 - 0.635	1	10.1229	0.0159219	0.24699	6.34598	YL	http://nonlinear.com/redirect/outbound?p=hmdb&param=YMDB00530
18.77_726.5084m/z	YMDB01176		M+Na-2H	C38H76NO8P	PC(14:0/16:0)	726.508	37.2	0.412	4.14205	90.5183	100 - 42.6 - 10.5 - 1.9 - 0.276	1	18.7711	0.00978586	0.216013	6.30919	YL	http://nonlinear.com/redirect/outbound?p=hmdb&param=YMDB01176
19.27_861.5504m/z	YMDB01244		M-H	C45H83O13P	PI(18:1(9Z)/18:1(9Z))	861.55	41.1	18.4	0.598553	87.7344	100 - 50.1 - 15 - 3.31 - 0.592	1	19.2742	0.0213796	0.300447	6.27845	YL	http://nonlinear.com/redirect/outbound?p=hmdb&param=YMDB01244
17.58_807.5035m/z	YMDB01228		M-H	C41H77O13P	PI(14:0/18:1(9Z))	807.503	38.2	3.49	0.700897	88.3986	100 - 45.7 - 12.9 - 2.71 - 0.463	1	17.5826	0.0273604	0.332862	6.22721	YL	http://nonlinear.com/redirect/outbound?p=hmdb&param=YMDB01228
17.58_807.5035m/z	YMDB01232		M-H	C41H77O13P	PI(14:1(9Z)/18:0)	807.503	37.9	1.86	0.700897	88.3986	100 - 45.7 - 12.9 - 2.71 - 0.463	1	17.5826	0.0273604	0.332862	6.22721	YL	http://nonlinear.com/redirect/outbound?p=hmdb&param=YMDB01232
17.58_807.5035m/z	YMDB01235		M-H	C41H77O13P	PI(16:0/16:1(9Z))	807.503	38.1	2.75	0.700897	88.3986	100 - 45.7 - 12.9 - 2.71 - 0.463	1	17.5826	0.0273604	0.332862	6.22721	YL	http://nonlinear.com/redirect/outbound?p=hmdb&param=YMDB01235
16.94_704.5228m/z	YMDB01177		M+H	C38H74NO8P	PC(14:0/16:1(9Z))	704.523	37.7	3.34	0.38405	85.7948	100 - 42.6 - 10.5 - 1.9 - 0.275	1	16.9433	0.00224684	0.24699	6.18156	YL	http://nonlinear.com/redirect/outbound?p=hmdb&param=YMDB01103
18.38_700.4923m/z	YMDB01178		M-H	C38H72NO8P	PC(14:1(9Z)/16:1(9Z))	700.492	37.8	0	0.0598594	88.8969	100 - 42.6 - 10.5 - 1.89 - 0.275	1	18.3768	0.0182932	0.286083	5.75413	YL	http://nonlinear.com/redirect/outbound?p=hmdb&param=YMDB01178
18.38_700.4923m/z	YMDB01863		M-H	C38H72NO8P	PC(16:1(9Z)/14:1(9Z))	700.492	39.3	7.56	0.0598594	88.8969	100 - 42.6 - 10.5 - 1.89 - 0.275	1	18.3768	0.0182932	0.286083	5.75413	YL	http://nonlinear.com/redirect/outbound?p=hmdb&param=YMDB01863
20.34_830.5921m/z	YMDB01191		M+FA-H	C44H84NO8P	PC(18:1(9Z)/18:1(9Z))	830.592	56.5	89.3	0.511724	93.66	100 - 49.2 - 13.5 - 2.67 - 0.421	1	20.3421	0.0425349	0.426898	5.25848	YL	http://nonlinear.com/redirect/outbound?p=hmdb&param=YMDB01191
20.34_830.5921m/z	YMDB01822		M+FA-H	C44H84NO8P	PC(14:0/22:2(13Z,16Z))	830.592	56.5	89.3	0.511724	93.66	100 - 49.2 - 13.5 - 2.67 - 0.421	1	20.3421	0.0425349	0.426898	5.25848	YL	http://nonlinear.com/redirect/outbound?p=hmdb&param=YMDB01822
20.34_830.5921m/z	YMDB01838		M+FA-H	C44H84NO8P	PC(14:1(9Z)/22:1(13Z))	830.592	56.5	89.3	0.511724	93.66	100 - 49.2 - 13.5 - 2.67 - 0.421	1	20.3421	0.0425349	0.426898	5.25848	YL	http://nonlinear.com/redirect/outbound?p=hmdb&param=YMDB01838
20.34_830.5921m/z	YMDB01850		M+FA-H	C44H84NO8P	PC(16:0/20:2(11Z,14Z))	830.592	56.5	89.3	0.511724	93.66	100 - 49.2 - 13.5 - 2.67 - 0.421	1	20.3421	0.0425349	0.426898	5.25848	YL	http://nonlinear.com/redirect/outbound?p=hmdb&param=YMDB01850
20.34_830.5921m/z	YMDB01871		M+FA-H	C44H84NO8P	PC(16:1(9Z)/20:1(11Z))	830.592	56.5	89.3	0.511724	93.66	100 - 49.2 - 13.5 - 2.67 - 0.421	1	20.3421	0.0425349	0.426898	5.25848	YL	http://nonlinear.com/redirect/outbound?p=hmdb&param=YMDB01871
20.34_830.5921m/z	YMDB01891		M+FA-H	C44H84NO8P	PC(18:0/18:2(9Z,12Z))	830.592	56.6	90.1	0.511724	93.66	100 - 49.2 - 13.5 - 2.67 - 0.421	1	20.3421	0.0425349	0.426898	5.25848	YL	http://nonlinear.com/redirect/outbound?p=hmdb&param=YMDB01891
20.34_830.5921m/z	YMDB01911		M+FA-H	C44H84NO8P	PC(18:1(11Z)/18:1(11Z))	830.592	56.5	89.3	0.511724	93.66	100 - 49.2 - 13.5 - 2.67 - 0.421	1	20.3421	0.0425349	0.426898	5.25848	YL	http://nonlinear.com/redirect/outbound?p=hmdb&param=YMDB01911
20.34_830.5921m/z	YMDB01912		M+FA-H	C44H84NO8P	PC(18:1(11Z)/18:1(9Z))	830.592	56.5	89.3	0.511724	93.66	100 - 49.2 - 13.5 - 2.67 - 0.421	1	20.3421	0.0425349	0.426898	5.25848	YL	http://nonlinear.com/redirect/outbound?p=hmdb&param=YMDB01912
20.34_830.5921m/z	YMDB01936		M+FA-H	C44H84NO8P	PC(18:1(9Z)/18:1(11Z))	830.592	56.5	89.3	0.511724	93.66	100 - 49.2 - 13.5 - 2.67 - 0.421	1	20.3421	0.0425349	0.426898	5.25848	YL	http://nonlinear.com/redirect/outbound?p=hmdb&param=YMDB01936
20.34_830.5921m/z	YMDB01958		M+FA-H	C44H84NO8P	PC(18:2(9Z,12Z)/18:0)	830.592	56.5	89.3	0.511724	93.66	100 - 49.2 - 13.5 - 2.67 - 0.421	1	20.3421	0.0425349	0.426898	5.25848	YL	http://nonlinear.com/redirect/outbound?p=hmdb&param=YMDB01958
20.34_830.5921m/z	YMDB02053		M+FA-H	C44H84NO8P	PC(20:1(11Z)/16:1(9Z))	830.592	56.5	89.3	0.511724	93.66	100 - 49.2 - 13.5 - 2.67 - 0.421	1	20.3421	0.0425349	0.426898	5.25848	YL	http://nonlinear.com/redirect/outbound?p=hmdb&param=YMDB02053
20.34_830.5921m/z	YMDB02069		M+FA-H	C44H84NO8P	PC(20:2(11Z,14Z)/16:0)	830.592	56.5	89.3	0.511724	93.66	100 - 49.2 - 13.5 - 2.67 - 0.421	1	20.3421	0.0425349	0.426898	5.25848	YL	http://nonlinear.com/redirect/outbound?p=hmdb&param=YMDB02069
20.34_830.5921m/z	YMDB02157		M+FA-H	C44H84NO8P	PC(22:1(13Z)/14:1(9Z))	830.592	56.5	89.3	0.511724	93.66	100 - 49.2 - 13.5 - 2.67 - 0.421	1	20.3421	0.0425349	0.426898	5.25848	YL	http://nonlinear.com/redirect/outbound?p=hmdb&param=YMDB02157
20.34_830.5921m/z	YMDB02169		M+FA-H	C44H84NO8P	PC(22:2(13Z,16Z)/14:0)	830.592	56.5	89.3	0.511724	93.66	100 - 49.2 - 13.5 - 2.67 - 0.421	1	20.3421	0.0425349	0.426898	5.25848	YL	http://nonlinear.com/redirect/outbound?p=hmdb&param=YMDB02169
18.99_690.5095m/z	YMDB01165		M+NH4	C37H69O8P	PA(16:1(9Z)/18:1(9Z))	690.51	35.1	0.417	3.98189	79.5779	100 - 41.1 - 9.88 - 1.75 - 0.249	1	18.9938	0.00647726	0.24699	5.25428	YL	http://nonlinear.com/redirect/outbound?p=hmdb&param=YMDB01813
18.99_690.5095m/z	YMDB01199		M+H	C37H72NO8P	PE(16:0/16:1(9Z))	690.51	39.8	24.4	3.88356	79.2614	100 - 41.5 - 10 - 1.79 - 0.256	1	18.9938	0.00647726	0.24699	5.25428	YL	http://nonlinear.com/redirect/outbound?p=hmdb&param=YMDB01814
17.98_833.5190m/z	YMDB01239		M-H	C43H79O13P	PI(16:1(9Z)/18:1(9Z))	833.519	42	17	0.489145	93.4024	100 - 47.9 - 13.9 - 2.99 - 0.524	1	17.9763	0.0184286	0.286083	4.59468	YL	http://nonlinear.com/redirect/outbound?p=hmdb&param=YMDB01239
17.96_780.4810m/z	YMDB01255		M+Na-2H	C40H74NO10P	PS(16:1(9Z)/18:1(9Z))	780.481	50.7	66.3	1.76031	89.3365	100 - 44.9 - 11.9 - 2.32 - 0.367	1	17.9592	0.0125713	0.236668	4.56573	YL	http://nonlinear.com/redirect/outbound?p=hmdb&param=YMDB01255
17.96_712.4927m/z	YMDB01198		M+Na-2H	C37H74NO8P	PE(16:0/16:0)	712.493	42.7	25.5	4.03497	92.6367	100 - 41.5 - 10.1 - 1.79 - 0.256	1	17.9592	0.0107478	0.223475	4.39926	YL	http://nonlinear.com/redirect/outbound?p=hmdb&param=YMDB01198
17.82_718.5370m/z	YMDB01169		M+NH4	C39H73O8P	PA(18:1(9Z)/18:1(9Z))	718.537	35.7	0.312	-1.67947	80.4154	100 - 43.3 - 10.8 - 1.97 - 0.288	1	17.8229	0.013805	0.24699	4.38891	YL	http://nonlinear.com/redirect/outbound?p=hmdb&param=YMDB01888
17.82_718.5370m/z	YMDB01200		M+H	C39H76NO8P	PE(16:0/18:1(9Z))	718.537	35.7	0.312	-1.63962	80.0957	100 - 43.7 - 11 - 2.01 - 0.296	1	17.8229	0.013805	0.24699	4.38891	YL	http://nonlinear.com/redirect/outbound?p=hmdb&param=YMDB01907
17.82_718.5370m/z	YMDB01205		M+H	C39H76NO8P	PE(18:0/16:1(9Z))	718.537	35.6	0	-1.63962	80.0957	100 - 43.7 - 11 - 2.01 - 0.296	1	17.8229	0.013805	0.24699	4.38891	YL	http://nonlinear.com/redirect/outbound?p=hmdb&param=YMDB01932
17.58_724.4931m/z	YMDB01177		M+Na-2H	C38H74NO8P	PC(14:0/16:1(9Z))	724.493	38.9	7.86	4.63141	91.9557	100 - 42.6 - 10.5 - 1.9 - 0.275	1	17.5826	0.0413483	0.419152	2.67719	YL	http://nonlinear.com/redirect/outbound?p=hmdb&param=YMDB01177
