# Supplementary material for: A new yeast strain for valorisation of vinasse, a rum distillery waste product
Source: Research Square preprint supplement (doi:10.21203/rs.3.rs-6593393/v1), 2025-05-12
Supplement: Supplementary file 3 [file 7e2c3b99f0aebfea65590c8b.xlsx]

## Sheet: Pos+Neg V1 28vs37 Highest Mean
Compound	Compound ID	Accepted?	Adducts	Formula	Score	Fragmentation Score	Mass Error (ppm)	Isotope Similarity	Theoretical Isotope Distribution		Description	Neutral mass (Da)	m/z	Charge	Retention time (min)	Anova (p)	q Value	Max Fold Change	Highest Mean
Positive ion data
Negative ion data
(A) HIGHEST in V1-28
5.16_569.2738m/z	YMDB01237		M-H	C25H47O12P	36.4	9.42	1.05905	73.8301	100 - 28 - 6.25 - 1.02 - 0.141		PI(16:1(9Z)/0:0)	http://nonlinear.com/redirect/outbound?p=hmdb&param=YMDB01237	569.274	1	5.15812	0.0320174	0.170757	18.759	V1 28
16.51_738.5091m/z	YMDB01200		M+Na-2H	C39H76NO8P	43	37.1	4.9904	83.5667	100 - 43.7 - 11 - 2.01 - 0.296		PE(16:0/18:1(9Z))	http://nonlinear.com/redirect/outbound?p=hmdb&param=YMDB01200	738.509	1	16.5142	0.0225156	0.147408	6.58219	V1 28
16.51_738.5091m/z	YMDB01205		M+Na-2H	C39H76NO8P	42.4	34.1	4.9904	83.5667	100 - 43.7 - 11 - 2.01 - 0.296		PE(18:0/16:1(9Z))	http://nonlinear.com/redirect/outbound?p=hmdb&param=YMDB01205	738.509	1	16.5142	0.0225156	0.147408	6.58219	V1 28
18.48_556.5313m/z	YMDB01102		M+H	C34H69NO4	37.4	0	2.50683	90.1794	100 - 38.1 - 7.87 - 1.16 - 0.134		Cer 18:0;3/16:0;0		556.531	1	18.4804	0.00536013	0.0143299	4.61103	V1 28
15.62_1161.5149m/z	YMDB00467		M+NH4	C47H84N7O17P3S	29.7	0	-4.04411	53.0602	100 - 55.8 - 23.3 - 7.17 - 1.8 - 0.382		trans-hexacos-2-enoyl-CoA		1161.51	1	15.6184	0.0142564	0.0255222	4.15229	V1 28
11.82_666.1320m/z	YMDB00143		M+H	C21H29N7O14P2	35	0.158	-0.00128415	74.9252	100 - 26.1 - 6.17 - 1.02 - 0.148		NADH		666.132	1	11.8242	0.00418659	0.01231	3.81873	V1 28
16.05_696.4615m/z	YMDB01174		M+Na-2H	C36H70NO8P	32.1	0	4.36321	65.8212	100 - 40.4 - 9.6 - 1.68 - 0.237		PC(12:0/16:1(9Z))	http://nonlinear.com/redirect/outbound?p=hmdb&param=YMDB01174	696.462	1	16.0522	0.0105346	0.099819	3.60255	V1 28
16.05_696.4615m/z	YMDB01811		M+Na-2H	C36H70NO8P	32.1	0	4.36321	65.8212	100 - 40.4 - 9.6 - 1.68 - 0.237		PC(14:0/14:1(9Z))	http://nonlinear.com/redirect/outbound?p=hmdb&param=YMDB01811	696.462	1	16.0522	0.0105346	0.099819	3.60255	V1 28
16.05_696.4615m/z	YMDB01830		M+Na-2H	C36H70NO8P	32.1	0	4.36321	65.8212	100 - 40.4 - 9.6 - 1.68 - 0.237		PC(14:1(9Z)/14:0)	http://nonlinear.com/redirect/outbound?p=hmdb&param=YMDB01830	696.462	1	16.0522	0.0105346	0.099819	3.60255	V1 28
12.60_703.5087m/z	YMDB01114		M+2H	C77H146O17P2	41.1	28.7	-0.414221	77.2369	100 - 85.6 - 39.7 - 13.1 - 3.4 - 0.739 - 0.139		CL(1'-[16:0/16:1(9Z)],3'-[18:0/18:1(9Z)])		703.509	2	12.6014	0.0108198	0.0218454	3.17528	V1 28
10.62_689.4934m/z	YMDB01112		M+2H	C75H142O17P2	39.3	24.5	-0.0400913	72.2121	100 - 83.4 - 37.8 - 12.2 - 3.12 - 0.668 - 0.124		CL(1'-[16:0/16:0],3'-[16:1(9Z)/18:1(9Z)])		689.493	2	10.6193	0.0110289	0.0220602	3.0002	V1 28
22.50_640.6224m/z	YMDB01105		M+H	C40H81NO4	34.6	0.307	-2.23413	75.2976	100 - 44.7 - 10.6 - 1.75 - 0.227		Cer 18:0;3/22:0;0		640.622	1	22.4956	0.0109751	0.0220195	2.76579	V1 28
23.15_684.6507m/z	YMDB00623		M+H	C42H85NO5	42.3	27.1	1.02022	85.6885	100 - 47 - 11.8 - 2.09 - 0.291		N-(24-Hydroxytetracosanoyl)phytosphingosine		684.651	1	23.1529	0.0473178	0.0585561	2.08416	V1 28
23.15_684.6507m/z	YMDB01107		M+H	C42H85NO5	42.3	27.1	1.02022	85.6885	100 - 47 - 11.8 - 2.09 - 0.291		Cer 18:0;3/24:0;1		684.651	1	23.1529	0.0473178	0.0585561	2.08416	V1 28
22.39_628.5883m/z	YMDB01104		M+H	C38H77NO5	38.8	14.7	1.40966	80.8832	100 - 42.5 - 9.85 - 1.63 - 0.212		Cer 18:0;3/20:0;1		628.588	1	22.3929	0.0375172	0.0495027	2.05653	V1 28
13.45_383.3301m/z	YMDB00608		M+H	C27H42O	38.3	0	-1.90278	93.7434	100 - 29.7 - 4.47 - 0.453		zymosterol intermediate 2		383.33	1	13.4468	0.0316645	0.0437733	2.02496	V1 28
13.45_383.3301m/z	YMDB01489		M+H	C27H42O	38.3	0.114	-1.90278	93.7434	100 - 29.7 - 4.47 - 0.453		7,8-Didehydrodesmosterol		383.33	1	13.4468	0.0316645	0.0437733	2.02496	V1 28
23.60_738.6602m/z	YMDB01260		M+NH4	C45H84O6	39.7	9.99	-0.545779	89.1127	100 - 49.9 - 13.4 - 2.55 - 0.382		TG(12:0/12:0/18:1(9Z))		738.66	1	23.5978	0.0295166	0.0416866	1.93072	V1 28
23.60_738.6602m/z	YMDB01262		M+NH4	C45H84O6	38.1	2.03	-0.545779	89.1127	100 - 49.9 - 13.4 - 2.55 - 0.382		TG(12:0/14:0/16:1(9Z))		738.66	1	23.5978	0.0295166	0.0416866	1.93072	V1 28
22.67_652.6614m/z	YMDB00619		M+H	C42H85NO3	38.5	6.36	1.82314	88.1288	100 - 46.9 - 11.4 - 1.89 - 0.243		N-tetracosanoylsphinganine		652.661	1	22.6668	0.0111691	0.0222604	1.88908	V1 28
23.34_736.6467m/z	YMDB01263		M+NH4	C45H82O6	37.1	4.41	2.43276	84.0644	100 - 49.8 - 13.4 - 2.55 - 0.382		TG(12:0/14:1(9Z)/16:1(9Z))		736.647	1	23.3411	0.0380779	0.0499352	1.82642	V1 28
9.38_430.3903m/z	YMDB01283		M+2H	C55H102O6	30.6	1.15	-1.86834	54.0597	100 - 60.9 - 19.4 - 4.32 - 0.746 - 0.106		TG(14:1(9Z)/16:1(9Z)/22:0)		430.39	2	9.38017	0.0257163	0.0377561	1.81206	V1 28
9.38_430.3903m/z	YMDB01293		M+2H	C55H102O6	30.4	0.244	-1.86834	54.0597	100 - 60.9 - 19.4 - 4.32 - 0.746 - 0.106		TG(16:0/18:1(9Z)/18:1(9Z))		430.39	2	9.38017	0.0257163	0.0377561	1.81206	V1 28
9.38_430.3903m/z	YMDB01301		M+2H	C55H102O6	30.6	1.17	-1.86834	54.0597	100 - 60.9 - 19.4 - 4.32 - 0.746 - 0.106		TG(16:1(9Z)/16:1(9Z)/20:0)		430.39	2	9.38017	0.0257163	0.0377561	1.81206	V1 28
9.38_430.3903m/z	YMDB01306		M+2H	C55H102O6	30.4	0	-1.86834	54.0597	100 - 60.9 - 19.4 - 4.32 - 0.746 - 0.106		TG(16:1(9Z)/18:0/18:1(9Z))		430.39	2	9.38017	0.0257163	0.0377561	1.81206	V1 28
17.99_640.5884m/z	YMDB01132		M+NH4	C39H74O5	45.6	37.8	1.53398	92.0334	100 - 43.2 - 10.1 - 1.69 - 0.223		DG(18:0/18:1(9Z)/0:0)		640.588	1	17.9942	0.0484064	0.0595091	1.62139	V1 28
19.87_556.5307m/z	YMDB01102		M+H	C34H69NO4	38.3	0.846	1.31473	92.4292	100 - 38.1 - 7.87 - 1.16 - 0.134		Cer 18:0;3/16:0;0		556.531	1	19.8735	0.0101253	0.020952	1.59467	V1 28
24.32_773.6642m/z	YMDB01281		M+H	C49H88O6	38.4	7.58	-1.57006	86.4734	100 - 54.2 - 15.7 - 3.17 - 0.504		TG(14:1(9Z)/16:1(9Z)/16:1(9Z))		773.664	1	24.3235	0.000200615	0.00265252	1.54928	V1 28
(B) HIGHEST in V1-37
18.14_671.4672m/z	YMDB01165		M-H	C37H69O8P	37.6	13.5	2.2102	76.9857	100 - 41.1 - 9.88 - 1.75 - 0.249		PA(16:1(9Z)/18:1(9Z))	http://nonlinear.com/redirect/outbound?p=hmdb&param=YMDB01165	671.467	1	18.1372	0.000283469	0.0204187	Infinity	V1 37
20.22_754.5411m/z	YMDB01817		M-H	C42H78NO8P	35.6	2.58	2.45674	78.3863	100 - 47 - 12.4 - 2.39 - 0.366		PC(14:0/20:3(5Z,8Z,11Z))	http://nonlinear.com/redirect/outbound?p=hmdb&param=YMDB01817	754.541	1	20.2223	0.000171033	0.016803	Infinity	V1 37
20.22_754.5411m/z	YMDB01818		M-H	C42H78NO8P	35.6	2.58	2.45674	78.3863	100 - 47 - 12.4 - 2.39 - 0.366		PC(14:0/20:3(8Z,11Z,14Z))	http://nonlinear.com/redirect/outbound?p=hmdb&param=YMDB01818	754.541	1	20.2223	0.000171033	0.016803	Infinity	V1 37
20.22_754.5411m/z	YMDB01834		M-H	C42H78NO8P	35.6	2.58	2.45674	78.3863	100 - 47 - 12.4 - 2.39 - 0.366		PC(14:1(9Z)/20:2(11Z,14Z))	http://nonlinear.com/redirect/outbound?p=hmdb&param=YMDB01834	754.541	1	20.2223	0.000171033	0.016803	Infinity	V1 37
20.22_754.5411m/z	YMDB01846		M-H	C42H78NO8P	35.7	3.04	2.45674	78.3863	100 - 47 - 12.4 - 2.39 - 0.366		PC(16:0/18:3(6Z,9Z,12Z))	http://nonlinear.com/redirect/outbound?p=hmdb&param=YMDB01846	754.541	1	20.2223	0.000171033	0.016803	Infinity	V1 37
20.22_754.5411m/z	YMDB01847		M-H	C42H78NO8P	35.7	3.09	2.45674	78.3863	100 - 47 - 12.4 - 2.39 - 0.366		PC(16:0/18:3(9Z,12Z,15Z))	http://nonlinear.com/redirect/outbound?p=hmdb&param=YMDB01847	754.541	1	20.2223	0.000171033	0.016803	Infinity	V1 37
20.22_754.5411m/z	YMDB01867		M-H	C42H78NO8P	35.6	2.72	2.45674	78.3863	100 - 47 - 12.4 - 2.39 - 0.366		PC(16:1(9Z)/18:2(9Z,12Z))	http://nonlinear.com/redirect/outbound?p=hmdb&param=YMDB01867	754.541	1	20.2223	0.000171033	0.016803	Infinity	V1 37
20.22_754.5411m/z	YMDB01957		M-H	C42H78NO8P	35.6	2.72	2.45674	78.3863	100 - 47 - 12.4 - 2.39 - 0.366		PC(18:2(9Z,12Z)/16:1(9Z))	http://nonlinear.com/redirect/outbound?p=hmdb&param=YMDB01957	754.541	1	20.2223	0.000171033	0.016803	Infinity	V1 37
20.22_754.5411m/z	YMDB01979		M-H	C42H78NO8P	35.7	3.04	2.45674	78.3863	100 - 47 - 12.4 - 2.39 - 0.366		PC(18:3(6Z,9Z,12Z)/16:0)	http://nonlinear.com/redirect/outbound?p=hmdb&param=YMDB01979	754.541	1	20.2223	0.000171033	0.016803	Infinity	V1 37
20.22_754.5411m/z	YMDB02000		M-H	C42H78NO8P	35.7	3.09	2.45674	78.3863	100 - 47 - 12.4 - 2.39 - 0.366		PC(18:3(9Z,12Z,15Z)/16:0)	http://nonlinear.com/redirect/outbound?p=hmdb&param=YMDB02000	754.541	1	20.2223	0.000171033	0.016803	Infinity	V1 37
20.22_754.5411m/z	YMDB02068		M-H	C42H78NO8P	35.6	2.58	2.45674	78.3863	100 - 47 - 12.4 - 2.39 - 0.366		PC(20:2(11Z,14Z)/14:1(9Z))	http://nonlinear.com/redirect/outbound?p=hmdb&param=YMDB02068	754.541	1	20.2223	0.000171033	0.016803	Infinity	V1 37
20.22_754.5411m/z	YMDB02087		M-H	C42H78NO8P	35.6	2.58	2.45674	78.3863	100 - 47 - 12.4 - 2.39 - 0.366		PC(20:3(5Z,8Z,11Z)/14:0)	http://nonlinear.com/redirect/outbound?p=hmdb&param=YMDB02087	754.541	1	20.2223	0.000171033	0.016803	Infinity	V1 37
20.22_754.5411m/z	YMDB02105		M-H	C42H78NO8P	35.6	2.58	2.45674	78.3863	100 - 47 - 12.4 - 2.39 - 0.366		PC(20:3(8Z,11Z,14Z)/14:0)	http://nonlinear.com/redirect/outbound?p=hmdb&param=YMDB02105	754.541	1	20.2223	0.000171033	0.016803	Infinity	V1 37
21.20_730.5408m/z	YMDB01181		M-H	C40H78NO8P	35.2	0.45	2.17448	77.9328	100 - 44.8 - 11.5 - 2.13 - 0.319		PC(16:0/16:1(9Z))	http://nonlinear.com/redirect/outbound?p=hmdb&param=YMDB01181	730.541	1	21.2047	0.0450474	0.201165	Infinity	V1 37
21.20_730.5408m/z	YMDB01813		M-H	C40H78NO8P	35.3	1.39	2.17448	77.9328	100 - 44.8 - 11.5 - 2.13 - 0.319		PC(14:0/18:1(11Z))	http://nonlinear.com/redirect/outbound?p=hmdb&param=YMDB01813	730.541	1	21.2047	0.0450474	0.201165	Infinity	V1 37
21.20_730.5408m/z	YMDB01814		M-H	C40H78NO8P	35.3	1.39	2.17448	77.9328	100 - 44.8 - 11.5 - 2.13 - 0.319		PC(14:0/18:1(9Z))	http://nonlinear.com/redirect/outbound?p=hmdb&param=YMDB01814	730.541	1	21.2047	0.0450474	0.201165	Infinity	V1 37
21.20_730.5408m/z	YMDB01831		M-H	C40H78NO8P	35.3	1.36	2.17448	77.9328	100 - 44.8 - 11.5 - 2.13 - 0.319		PC(14:1(9Z)/18:0)	http://nonlinear.com/redirect/outbound?p=hmdb&param=YMDB01831	730.541	1	21.2047	0.0450474	0.201165	Infinity	V1 37
21.20_730.5408m/z	YMDB01864		M-H	C40H78NO8P	35.2	0.45	2.17448	77.9328	100 - 44.8 - 11.5 - 2.13 - 0.319		PC(16:1(9Z)/16:0)	http://nonlinear.com/redirect/outbound?p=hmdb&param=YMDB01864	730.541	1	21.2047	0.0450474	0.201165	Infinity	V1 37
21.20_730.5408m/z	YMDB01888		M-H	C40H78NO8P	35.5	2.33	2.17448	77.9328	100 - 44.8 - 11.5 - 2.13 - 0.319		PC(18:0/14:1(9Z))	http://nonlinear.com/redirect/outbound?p=hmdb&param=YMDB01888	730.541	1	21.2047	0.0450474	0.201165	Infinity	V1 37
21.20_730.5408m/z	YMDB01907		M-H	C40H78NO8P	35.5	2.38	2.17448	77.9328	100 - 44.8 - 11.5 - 2.13 - 0.319		PC(18:1(11Z)/14:0)	http://nonlinear.com/redirect/outbound?p=hmdb&param=YMDB01907	730.541	1	21.2047	0.0450474	0.201165	Infinity	V1 37
21.20_730.5408m/z	YMDB01932		M-H	C40H78NO8P	35.5	2.38	2.17448	77.9328	100 - 44.8 - 11.5 - 2.13 - 0.319		PC(18:1(9Z)/14:0)	http://nonlinear.com/redirect/outbound?p=hmdb&param=YMDB01932	730.541	1	21.2047	0.0450474	0.201165	Infinity	V1 37
21.24_756.5568m/z	YMDB01186		M-H	C42H80NO8P	37.1	10.1	2.54879	78.2041	100 - 47 - 12.5 - 2.39 - 0.367		PC(16:1(9Z)/18:1(9Z))	http://nonlinear.com/redirect/outbound?p=hmdb&param=YMDB01186	756.557	1	21.2389	0.0141686	0.111593	Infinity	V1 37
21.24_756.5568m/z	YMDB01816		M-H	C42H80NO8P	36.8	8.8	2.54879	78.2041	100 - 47 - 12.5 - 2.39 - 0.367		PC(14:0/20:2(11Z,14Z))	http://nonlinear.com/redirect/outbound?p=hmdb&param=YMDB01816	756.557	1	21.2389	0.0141686	0.111593	Infinity	V1 37
21.24_756.5568m/z	YMDB01833		M-H	C42H80NO8P	36.8	8.8	2.54879	78.2041	100 - 47 - 12.5 - 2.39 - 0.367		PC(14:1(9Z)/20:1(11Z))	http://nonlinear.com/redirect/outbound?p=hmdb&param=YMDB01833	756.557	1	21.2389	0.0141686	0.111593	Infinity	V1 37
21.24_756.5568m/z	YMDB01845		M-H	C42H80NO8P	36.9	9.27	2.54879	78.2041	100 - 47 - 12.5 - 2.39 - 0.367		PC(16:0/18:2(9Z,12Z))	http://nonlinear.com/redirect/outbound?p=hmdb&param=YMDB01845	756.557	1	21.2389	0.0141686	0.111593	Infinity	V1 37
21.24_756.5568m/z	YMDB01866		M-H	C42H80NO8P	37.1	10.1	2.54879	78.2041	100 - 47 - 12.5 - 2.39 - 0.367		PC(16:1(9Z)/18:1(11Z))	http://nonlinear.com/redirect/outbound?p=hmdb&param=YMDB01866	756.557	1	21.2389	0.0141686	0.111593	Infinity	V1 37
21.24_756.5568m/z	YMDB01909		M-H	C42H80NO8P	37.1	10.1	2.54879	78.2041	100 - 47 - 12.5 - 2.39 - 0.367		PC(18:1(11Z)/16:1(9Z))	http://nonlinear.com/redirect/outbound?p=hmdb&param=YMDB01909	756.557	1	21.2389	0.0141686	0.111593	Infinity	V1 37
21.24_756.5568m/z	YMDB01934		M-H	C42H80NO8P	37.1	10.1	2.54879	78.2041	100 - 47 - 12.5 - 2.39 - 0.367		PC(18:1(9Z)/16:1(9Z))	http://nonlinear.com/redirect/outbound?p=hmdb&param=YMDB01934	756.557	1	21.2389	0.0141686	0.111593	Infinity	V1 37
21.24_756.5568m/z	YMDB01956		M-H	C42H80NO8P	36.9	9.27	2.54879	78.2041	100 - 47 - 12.5 - 2.39 - 0.367		PC(18:2(9Z,12Z)/16:0)	http://nonlinear.com/redirect/outbound?p=hmdb&param=YMDB01956	756.557	1	21.2389	0.0141686	0.111593	Infinity	V1 37
21.24_756.5568m/z	YMDB02051		M-H	C42H80NO8P	36.8	8.8	2.54879	78.2041	100 - 47 - 12.5 - 2.39 - 0.367		PC(20:1(11Z)/14:1(9Z))	http://nonlinear.com/redirect/outbound?p=hmdb&param=YMDB02051	756.557	1	21.2389	0.0141686	0.111593	Infinity	V1 37
21.24_756.5568m/z	YMDB02067		M-H	C42H80NO8P	36.8	8.8	2.54879	78.2041	100 - 47 - 12.5 - 2.39 - 0.367		PC(20:2(11Z,14Z)/14:0)	http://nonlinear.com/redirect/outbound?p=hmdb&param=YMDB02067	756.557	1	21.2389	0.0141686	0.111593	Infinity	V1 37
21.89_744.5565m/z	YMDB01206		M-H	C41H80NO8P	39.8	23.5	2.24019	78.1485	100 - 45.9 - 12 - 2.26 - 0.342		PE(18:0/18:1(9Z))	http://nonlinear.com/redirect/outbound?p=hmdb&param=YMDB01206	744.557	1	21.8893	0.00174259	0.0489777	Infinity	V1 37
16.26_824.5299m/z	YMDB01238		M+NH4	C41H75O13P	36.6	8.43	1.86696	76.6042	100 - 45.7 - 12.9 - 2.7 - 0.463		PI(16:1(9Z)/16:1(9Z))		824.53	1	16.2586	0.00450118	0.0129195	1761.1	V1 37
20.96_818.5921m/z	YMDB01133		M-H2O-H	C44H88NO11P	48.6	56	0.502739	87.5963	100 - 49.4 - 14.2 - 3 - 0.51		IPC 18:0;2/20:0;0	http://nonlinear.com/redirect/outbound?p=hmdb&param=YMDB01133	818.592	1	20.9582	0.000832711	0.0353266	461.695	V1 37
20.03_774.5300m/z	YMDB01185		M+FA-H	C40H76NO8P	42.3	23.8	1.35247	89.5292	100 - 44.8 - 11.4 - 2.13 - 0.318		PC(16:1(9Z)/16:1(9Z))	http://nonlinear.com/redirect/outbound?p=hmdb&param=YMDB01185	774.53	1	20.0341	0.00183311	0.0495908	221.778	V1 37
20.62_856.6089m/z	YMDB01878		M+FA-H	C46H86NO8P	39.5	14	1.99718	86.0102	100 - 51.4 - 14.6 - 2.97 - 0.481		PC(16:1(9Z)/22:2(13Z,16Z))	http://nonlinear.com/redirect/outbound?p=hmdb&param=YMDB01878	856.609	1	20.6159	0.00127838	0.0427888	114.607	V1 37
20.62_856.6089m/z	YMDB01895		M+FA-H	C46H86NO8P	38.7	9.93	1.99718	86.0102	100 - 51.4 - 14.6 - 2.97 - 0.481		PC(18:0/20:3(5Z,8Z,11Z))	http://nonlinear.com/redirect/outbound?p=hmdb&param=YMDB01895	856.609	1	20.6159	0.00127838	0.0427888	114.607	V1 37
20.62_856.6089m/z	YMDB01896		M+FA-H	C46H86NO8P	38.7	9.93	1.99718	86.0102	100 - 51.4 - 14.6 - 2.97 - 0.481		PC(18:0/20:3(8Z,11Z,14Z))	http://nonlinear.com/redirect/outbound?p=hmdb&param=YMDB01896	856.609	1	20.6159	0.00127838	0.0427888	114.607	V1 37
20.62_856.6089m/z	YMDB01917		M+FA-H	C46H86NO8P	39.5	14.1	1.99718	86.0102	100 - 51.4 - 14.6 - 2.97 - 0.481		PC(18:1(11Z)/20:2(11Z,14Z))	http://nonlinear.com/redirect/outbound?p=hmdb&param=YMDB01917	856.609	1	20.6159	0.00127838	0.0427888	114.607	V1 37
20.62_856.6089m/z	YMDB01941		M+FA-H	C46H86NO8P	39.5	14.1	1.99718	86.0102	100 - 51.4 - 14.6 - 2.97 - 0.481		PC(18:1(9Z)/20:2(11Z,14Z))	http://nonlinear.com/redirect/outbound?p=hmdb&param=YMDB01941	856.609	1	20.6159	0.00127838	0.0427888	114.607	V1 37
20.62_856.6089m/z	YMDB01966		M+FA-H	C46H86NO8P	39.5	14	1.99718	86.0102	100 - 51.4 - 14.6 - 2.97 - 0.481		PC(18:2(9Z,12Z)/20:1(11Z))	http://nonlinear.com/redirect/outbound?p=hmdb&param=YMDB01966	856.609	1	20.6159	0.00127838	0.0427888	114.607	V1 37
20.62_856.6089m/z	YMDB01987		M+FA-H	C46H86NO8P	38.7	9.73	1.99718	86.0102	100 - 51.4 - 14.6 - 2.97 - 0.481		PC(18:3(6Z,9Z,12Z)/20:0)	http://nonlinear.com/redirect/outbound?p=hmdb&param=YMDB01987	856.609	1	20.6159	0.00127838	0.0427888	114.607	V1 37
20.62_856.6089m/z	YMDB02008		M+FA-H	C46H86NO8P	49.5	64.1	1.99718	86.0102	100 - 51.4 - 14.6 - 2.97 - 0.481		PC(18:3(9Z,12Z,15Z)/20:0)	http://nonlinear.com/redirect/outbound?p=hmdb&param=YMDB02008	856.609	1	20.6159	0.00127838	0.0427888	114.607	V1 37
20.62_856.6089m/z	YMDB02038		M+FA-H	C46H86NO8P	38.7	9.73	1.99718	86.0102	100 - 51.4 - 14.6 - 2.97 - 0.481		PC(20:0/18:3(6Z,9Z,12Z))	http://nonlinear.com/redirect/outbound?p=hmdb&param=YMDB02038	856.609	1	20.6159	0.00127838	0.0427888	114.607	V1 37
20.62_856.6089m/z	YMDB02039		M+FA-H	C46H86NO8P	49.5	64.1	1.99718	86.0102	100 - 51.4 - 14.6 - 2.97 - 0.481		PC(20:0/18:3(9Z,12Z,15Z))	http://nonlinear.com/redirect/outbound?p=hmdb&param=YMDB02039	856.609	1	20.6159	0.00127838	0.0427888	114.607	V1 37
20.62_856.6089m/z	YMDB02054		M+FA-H	C46H86NO8P	39.5	14	1.99718	86.0102	100 - 51.4 - 14.6 - 2.97 - 0.481		PC(20:1(11Z)/18:2(9Z,12Z))	http://nonlinear.com/redirect/outbound?p=hmdb&param=YMDB02054	856.609	1	20.6159	0.00127838	0.0427888	114.607	V1 37
20.62_856.6089m/z	YMDB02071		M+FA-H	C46H86NO8P	39.5	14.1	1.99718	86.0102	100 - 51.4 - 14.6 - 2.97 - 0.481		PC(20:2(11Z,14Z)/18:1(11Z))	http://nonlinear.com/redirect/outbound?p=hmdb&param=YMDB02071	856.609	1	20.6159	0.00127838	0.0427888	114.607	V1 37
20.62_856.6089m/z	YMDB02072		M+FA-H	C46H86NO8P	39.5	14.1	1.99718	86.0102	100 - 51.4 - 14.6 - 2.97 - 0.481		PC(20:2(11Z,14Z)/18:1(9Z))	http://nonlinear.com/redirect/outbound?p=hmdb&param=YMDB02072	856.609	1	20.6159	0.00127838	0.0427888	114.607	V1 37
20.62_856.6089m/z	YMDB02091		M+FA-H	C46H86NO8P	38.7	9.93	1.99718	86.0102	100 - 51.4 - 14.6 - 2.97 - 0.481		PC(20:3(5Z,8Z,11Z)/18:0)	http://nonlinear.com/redirect/outbound?p=hmdb&param=YMDB02091	856.609	1	20.6159	0.00127838	0.0427888	114.607	V1 37
20.62_856.6089m/z	YMDB02109		M+FA-H	C46H86NO8P	38.7	9.93	1.99718	86.0102	100 - 51.4 - 14.6 - 2.97 - 0.481		PC(20:3(8Z,11Z,14Z)/18:0)	http://nonlinear.com/redirect/outbound?p=hmdb&param=YMDB02109	856.609	1	20.6159	0.00127838	0.0427888	114.607	V1 37
20.62_856.6089m/z	YMDB02171		M+FA-H	C46H86NO8P	39.5	14	1.99718	86.0102	100 - 51.4 - 14.6 - 2.97 - 0.481		PC(22:2(13Z,16Z)/16:1(9Z))	http://nonlinear.com/redirect/outbound?p=hmdb&param=YMDB02171	856.609	1	20.6159	0.00127838	0.0427888	114.607	V1 37
21.67_832.6082m/z	YMDB01189		M+FA-H	C44H86NO8P	50.8	66.4	1.18225	88.9029	100 - 49.2 - 13.5 - 2.67 - 0.422		PC(18:0/18:1(9Z))	http://nonlinear.com/redirect/outbound?p=hmdb&param=YMDB01189	832.608	1	21.6669	0.00417127	0.0642885	48.1314	V1 37
21.67_832.6082m/z	YMDB01821		M+FA-H	C44H86NO8P	50.8	66.3	1.18225	88.9029	100 - 49.2 - 13.5 - 2.67 - 0.422		PC(14:0/22:1(13Z))	http://nonlinear.com/redirect/outbound?p=hmdb&param=YMDB01821	832.608	1	21.6669	0.00417127	0.0642885	48.1314	V1 37
21.67_832.6082m/z	YMDB01837		M+FA-H	C44H86NO8P	50.4	64.4	1.18225	88.9029	100 - 49.2 - 13.5 - 2.67 - 0.422		PC(14:1(9Z)/22:0)	http://nonlinear.com/redirect/outbound?p=hmdb&param=YMDB01837	832.608	1	21.6669	0.00417127	0.0642885	48.1314	V1 37
21.67_832.6082m/z	YMDB01849		M+FA-H	C44H86NO8P	50.8	66.3	1.18225	88.9029	100 - 49.2 - 13.5 - 2.67 - 0.422		PC(16:0/20:1(11Z))	http://nonlinear.com/redirect/outbound?p=hmdb&param=YMDB01849	832.608	1	21.6669	0.00417127	0.0642885	48.1314	V1 37
21.67_832.6082m/z	YMDB01870		M+FA-H	C44H86NO8P	50.4	64.4	1.18225	88.9029	100 - 49.2 - 13.5 - 2.67 - 0.422		PC(16:1(9Z)/20:0)	http://nonlinear.com/redirect/outbound?p=hmdb&param=YMDB01870	832.608	1	21.6669	0.00417127	0.0642885	48.1314	V1 37
21.67_832.6082m/z	YMDB01890		M+FA-H	C44H86NO8P	50.8	66.4	1.18225	88.9029	100 - 49.2 - 13.5 - 2.67 - 0.422		PC(18:0/18:1(11Z))	http://nonlinear.com/redirect/outbound?p=hmdb&param=YMDB01890	832.608	1	21.6669	0.00417127	0.0642885	48.1314	V1 37
21.67_832.6082m/z	YMDB01910		M+FA-H	C44H86NO8P	50.8	66.4	1.18225	88.9029	100 - 49.2 - 13.5 - 2.67 - 0.422		PC(18:1(11Z)/18:0)	http://nonlinear.com/redirect/outbound?p=hmdb&param=YMDB01910	832.608	1	21.6669	0.00417127	0.0642885	48.1314	V1 37
21.67_832.6082m/z	YMDB01935		M+FA-H	C44H86NO8P	50.8	66.4	1.18225	88.9029	100 - 49.2 - 13.5 - 2.67 - 0.422		PC(18:1(9Z)/18:0)	http://nonlinear.com/redirect/outbound?p=hmdb&param=YMDB01935	832.608	1	21.6669	0.00417127	0.0642885	48.1314	V1 37
21.67_832.6082m/z	YMDB02037		M+FA-H	C44H86NO8P	50.4	64.4	1.18225	88.9029	100 - 49.2 - 13.5 - 2.67 - 0.422		PC(20:0/16:1(9Z))	http://nonlinear.com/redirect/outbound?p=hmdb&param=YMDB02037	832.608	1	21.6669	0.00417127	0.0642885	48.1314	V1 37
21.67_832.6082m/z	YMDB02052		M+FA-H	C44H86NO8P	50.8	66.3	1.18225	88.9029	100 - 49.2 - 13.5 - 2.67 - 0.422		PC(20:1(11Z)/16:0)	http://nonlinear.com/redirect/outbound?p=hmdb&param=YMDB02052	832.608	1	21.6669	0.00417127	0.0642885	48.1314	V1 37
21.67_832.6082m/z	YMDB02147		M+FA-H	C44H86NO8P	50.4	64.4	1.18225	88.9029	100 - 49.2 - 13.5 - 2.67 - 0.422		PC(22:0/14:1(9Z))	http://nonlinear.com/redirect/outbound?p=hmdb&param=YMDB02147	832.608	1	21.6669	0.00417127	0.0642885	48.1314	V1 37
21.67_832.6082m/z	YMDB02156		M+FA-H	C44H86NO8P	50.8	66.3	1.18225	88.9029	100 - 49.2 - 13.5 - 2.67 - 0.422		PC(22:1(13Z)/14:0)	http://nonlinear.com/redirect/outbound?p=hmdb&param=YMDB02156	832.608	1	21.6669	0.00417127	0.0642885	48.1314	V1 37
19.27_760.5138m/z	YMDB01203		M+FA-H	C39H74NO8P	50.7	61	0.49146	93.3263	100 - 43.7 - 11 - 2.01 - 0.296		PE(16:1(9Z)/18:1(9Z))	http://nonlinear.com/redirect/outbound?p=hmdb&param=YMDB01203	760.514	1	19.2742	5.29e-06	0.000996332	46.8444	V1 37
19.27_760.5138m/z	YMDB01253		M-H	C40H76NO10P	51.3	65	0.461768	91.8664	100 - 44.9 - 11.9 - 2.32 - 0.367		PS(16:0/18:1(9Z))	http://nonlinear.com/redirect/outbound?p=hmdb&param=YMDB01253	760.514	1	19.2742	5.29e-06	0.000996332	46.8444	V1 37
20.60_863.5662m/z	YMDB01242		M-H	C45H85O13P	37.5	1.73	0.858744	87.0202	100 - 50.1 - 15 - 3.31 - 0.593		PI(18:0/18:1(9Z))	http://nonlinear.com/redirect/outbound?p=hmdb&param=YMDB01242	863.566	1	20.5988	0.0136211	0.109123	42.3562	V1 37
19.43_786.5313m/z	YMDB01259		M-H	C42H78NO10P	43.7	33.5	2.85521	88.1994	100 - 47.1 - 12.9 - 2.59 - 0.42		PS(18:1(9Z)/18:1(9Z))	http://nonlinear.com/redirect/outbound?p=hmdb&param=YMDB01259	786.531	1	19.4282	0.00682731	0.0814385	36.6847	V1 37
10.12_482.3252m/z	YMDB01204		M+H	C23H48NO7P	40.2	6.7	2.3332	96.8776	100 - 26.1 - 4.7 - 0.635		PE(18:0/0:0)		482.325	1	10.1229	0.00287291	0.0100518	33.6687	V1 37
19.58_854.5932m/z	YMDB01856		M+FA-H	C46H84NO8P	37.7	3.42	1.89737	87.3827	100 - 51.4 - 14.6 - 2.97 - 0.48		PC(16:0/22:4(7Z,10Z,13Z,16Z))	http://nonlinear.com/redirect/outbound?p=hmdb&param=YMDB01856	854.593	1	19.5822	0.00698549	0.0814385	32.2228	V1 37
19.58_854.5932m/z	YMDB01897		M+FA-H	C46H84NO8P	37.7	3.56	1.89737	87.3827	100 - 51.4 - 14.6 - 2.97 - 0.48		PC(18:0/20:4(5Z,8Z,11Z,14Z))	http://nonlinear.com/redirect/outbound?p=hmdb&param=YMDB01897	854.593	1	19.5822	0.00698549	0.0814385	32.2228	V1 37
19.58_854.5932m/z	YMDB01898		M+FA-H	C46H84NO8P	43.6	33.1	1.89737	87.3827	100 - 51.4 - 14.6 - 2.97 - 0.48		PC(18:0/20:4(8Z,11Z,14Z,17Z))	http://nonlinear.com/redirect/outbound?p=hmdb&param=YMDB01898	854.593	1	19.5822	0.00698549	0.0814385	32.2228	V1 37
19.58_854.5932m/z	YMDB01918		M+FA-H	C46H84NO8P	38.3	6.47	1.89737	87.3827	100 - 51.4 - 14.6 - 2.97 - 0.48		PC(18:1(11Z)/20:3(5Z,8Z,11Z))	http://nonlinear.com/redirect/outbound?p=hmdb&param=YMDB01918	854.593	1	19.5822	0.00698549	0.0814385	32.2228	V1 37
19.58_854.5932m/z	YMDB01919		M+FA-H	C46H84NO8P	38.3	6.47	1.89737	87.3827	100 - 51.4 - 14.6 - 2.97 - 0.48		PC(18:1(11Z)/20:3(8Z,11Z,14Z))	http://nonlinear.com/redirect/outbound?p=hmdb&param=YMDB01919	854.593	1	19.5822	0.00698549	0.0814385	32.2228	V1 37
19.58_854.5932m/z	YMDB01942		M+FA-H	C46H84NO8P	38.3	6.47	1.89737	87.3827	100 - 51.4 - 14.6 - 2.97 - 0.48		PC(18:1(9Z)/20:3(5Z,8Z,11Z))	http://nonlinear.com/redirect/outbound?p=hmdb&param=YMDB01942	854.593	1	19.5822	0.00698549	0.0814385	32.2228	V1 37
19.58_854.5932m/z	YMDB01943		M+FA-H	C46H84NO8P	38.3	6.47	1.89737	87.3827	100 - 51.4 - 14.6 - 2.97 - 0.48		PC(18:1(9Z)/20:3(8Z,11Z,14Z))	http://nonlinear.com/redirect/outbound?p=hmdb&param=YMDB01943	854.593	1	19.5822	0.00698549	0.0814385	32.2228	V1 37
19.58_854.5932m/z	YMDB01967		M+FA-H	C46H84NO8P	38.3	6.29	1.89737	87.3827	100 - 51.4 - 14.6 - 2.97 - 0.48		PC(18:2(9Z,12Z)/20:2(11Z,14Z))	http://nonlinear.com/redirect/outbound?p=hmdb&param=YMDB01967	854.593	1	19.5822	0.00698549	0.0814385	32.2228	V1 37
19.58_854.5932m/z	YMDB01988		M+FA-H	C46H84NO8P	38.3	6.43	1.89737	87.3827	100 - 51.4 - 14.6 - 2.97 - 0.48		PC(18:3(6Z,9Z,12Z)/20:1(11Z))	http://nonlinear.com/redirect/outbound?p=hmdb&param=YMDB01988	854.593	1	19.5822	0.00698549	0.0814385	32.2228	V1 37
19.58_854.5932m/z	YMDB02009		M+FA-H	C46H84NO8P	44.2	36	1.89737	87.3827	100 - 51.4 - 14.6 - 2.97 - 0.48		PC(18:3(9Z,12Z,15Z)/20:1(11Z))	http://nonlinear.com/redirect/outbound?p=hmdb&param=YMDB02009	854.593	1	19.5822	0.00698549	0.0814385	32.2228	V1 37
19.58_854.5932m/z	YMDB02026		M+FA-H	C46H84NO8P	43.6	33.1	1.89737	87.3827	100 - 51.4 - 14.6 - 2.97 - 0.48		PC(18:4(6Z,9Z,12Z,15Z)/20:0)	http://nonlinear.com/redirect/outbound?p=hmdb&param=YMDB02026	854.593	1	19.5822	0.00698549	0.0814385	32.2228	V1 37
19.58_854.5932m/z	YMDB02040		M+FA-H	C46H84NO8P	43.6	33.1	1.89737	87.3827	100 - 51.4 - 14.6 - 2.97 - 0.48		PC(20:0/18:4(6Z,9Z,12Z,15Z))	http://nonlinear.com/redirect/outbound?p=hmdb&param=YMDB02040	854.593	1	19.5822	0.00698549	0.0814385	32.2228	V1 37
19.58_854.5932m/z	YMDB02055		M+FA-H	C46H84NO8P	38.3	6.43	1.89737	87.3827	100 - 51.4 - 14.6 - 2.97 - 0.48		PC(20:1(11Z)/18:3(6Z,9Z,12Z))	http://nonlinear.com/redirect/outbound?p=hmdb&param=YMDB02055	854.593	1	19.5822	0.00698549	0.0814385	32.2228	V1 37
19.58_854.5932m/z	YMDB02056		M+FA-H	C46H84NO8P	44.2	36	1.89737	87.3827	100 - 51.4 - 14.6 - 2.97 - 0.48		PC(20:1(11Z)/18:3(9Z,12Z,15Z))	http://nonlinear.com/redirect/outbound?p=hmdb&param=YMDB02056	854.593	1	19.5822	0.00698549	0.0814385	32.2228	V1 37
19.58_854.5932m/z	YMDB02073		M+FA-H	C46H84NO8P	38.3	6.29	1.89737	87.3827	100 - 51.4 - 14.6 - 2.97 - 0.48		PC(20:2(11Z,14Z)/18:2(9Z,12Z))	http://nonlinear.com/redirect/outbound?p=hmdb&param=YMDB02073	854.593	1	19.5822	0.00698549	0.0814385	32.2228	V1 37
19.58_854.5932m/z	YMDB02092		M+FA-H	C46H84NO8P	38.3	6.47	1.89737	87.3827	100 - 51.4 - 14.6 - 2.97 - 0.48		PC(20:3(5Z,8Z,11Z)/18:1(11Z))	http://nonlinear.com/redirect/outbound?p=hmdb&param=YMDB02092	854.593	1	19.5822	0.00698549	0.0814385	32.2228	V1 37
19.58_854.5932m/z	YMDB02093		M+FA-H	C46H84NO8P	38.3	6.47	1.89737	87.3827	100 - 51.4 - 14.6 - 2.97 - 0.48		PC(20:3(5Z,8Z,11Z)/18:1(9Z))	http://nonlinear.com/redirect/outbound?p=hmdb&param=YMDB02093	854.593	1	19.5822	0.00698549	0.0814385	32.2228	V1 37
19.58_854.5932m/z	YMDB02110		M+FA-H	C46H84NO8P	38.3	6.47	1.89737	87.3827	100 - 51.4 - 14.6 - 2.97 - 0.48		PC(20:3(8Z,11Z,14Z)/18:1(11Z))	http://nonlinear.com/redirect/outbound?p=hmdb&param=YMDB02110	854.593	1	19.5822	0.00698549	0.0814385	32.2228	V1 37
19.58_854.5932m/z	YMDB02111		M+FA-H	C46H84NO8P	38.3	6.47	1.89737	87.3827	100 - 51.4 - 14.6 - 2.97 - 0.48		PC(20:3(8Z,11Z,14Z)/18:1(9Z))	http://nonlinear.com/redirect/outbound?p=hmdb&param=YMDB02111	854.593	1	19.5822	0.00698549	0.0814385	32.2228	V1 37
20.17_798.5453m/z	YMDB01134		M+H	C40H80NO12P	36.6	8.7	-4.69115	79.929	100 - 45 - 12.4 - 2.52 - 0.42		IPC 18:0;3/16:0;0		798.545	1	20.1713	0.00274529	0.00978738	27.8808	V1 37
18.12_758.4985m/z	YMDB01255		M-H	C40H74NO10P	50.3	64.3	1.03971	88.4384	100 - 44.9 - 11.9 - 2.32 - 0.367		PS(16:1(9Z)/18:1(9Z))	http://nonlinear.com/redirect/outbound?p=hmdb&param=YMDB01255	758.499	1	18.1201	0.00757245	0.0819388	23.013	V1 37
7.36_384.2759m/z	YMDB01533		M-H	C21H39NO5	37.7	0.406	0.994649	89.4054	100 - 23.7 - 3.72 - 0.437		L-Palmitoylcarnitine	http://nonlinear.com/redirect/outbound?p=hmdb&param=YMDB01533	384.276	1	7.36243	0.0184396	0.131877	20.723	V1 37
19.12_835.5343m/z	YMDB01236		M-H	C43H81O13P	44.3	26.2	0.0753697	95.1264	100 - 47.9 - 13.9 - 3 - 0.525		PI(16:0/18:1(9Z))	http://nonlinear.com/redirect/outbound?p=hmdb&param=YMDB01236	835.534	1	19.1202	0.00350614	0.0590733	18.182	V1 37
19.12_835.5343m/z	YMDB01241		M-H	C43H81O13P	44.3	26.5	0.0753697	95.1264	100 - 47.9 - 13.9 - 3 - 0.525		PI(18:0/16:1(9Z))	http://nonlinear.com/redirect/outbound?p=hmdb&param=YMDB01241	835.534	1	19.1202	0.00350614	0.0590733	18.182	V1 37
9.89_524.3721m/z	YMDB01187		M+H	C26H54NO7P	45.9	36.9	1.98626	95.1239	100 - 29.4 - 5.6 - 0.801		PC(18:0/0:0)		524.372	1	9.89362	0.000819107	0.00479868	17.8854	V1 37
19.24_782.4959m/z	YMDB01253		M+Na-2H	C40H76NO10P	43.3	28.9	0.754771	88.6359	100 - 44.9 - 11.9 - 2.32 - 0.367		PS(16:0/18:1(9Z))	http://nonlinear.com/redirect/outbound?p=hmdb&param=YMDB01253	782.496	1	19.24	0.00127431	0.0427888	17.5088	V1 37
19.91_728.5242m/z	YMDB01185		M-H	C40H76NO8P	48.1	53	0.800806	88.6025	100 - 44.8 - 11.4 - 2.13 - 0.318		PC(16:1(9Z)/16:1(9Z))	http://nonlinear.com/redirect/outbound?p=hmdb&param=YMDB01185	728.524	1	19.9074	0.00277024	0.0557767	15.2834	V1 37
7.65_544.3382m/z	YMDB02213		M+H	C28H50NO7P	43.7	29.6	-2.86402	92.0692	100 - 31.5 - 6.23 - 0.922 - 0.111		LysoPC(20:4(5Z,8Z,11Z,14Z))		544.338	1	7.65488	0.0308473	0.0430277	14.5273	V1 37
7.65_544.3382m/z	YMDB02214		M+H	C28H50NO7P	43	26.1	-2.86402	92.0692	100 - 31.5 - 6.23 - 0.922 - 0.111		LysoPC(20:4(8Z,11Z,14Z,17Z))		544.338	1	7.65488	0.0308473	0.0430277	14.5273	V1 37
6.40_520.3400m/z	YMDB02212		M+H	C26H50NO7P	47.3	40	0.525337	97.1173	100 - 29.3 - 5.59 - 0.798		LysoPC(18:2(9Z,12Z))		520.34	1	6.39857	0.0336649	0.0456993	13.6236	V1 37
8.93_468.3094m/z	YMDB01175		M+H	C22H46NO7P	35.1	0.916	1.91733	76.944	100 - 25 - 4.42 - 0.586		PC(14:0/0:0)		468.309	1	8.9283	0.0322419	0.044289	13.5539	V1 37
18.46_852.5770m/z	YMDB01857		M+FA-H	C46H82NO8P	38.2	9.97	1.26336	82.3638	100 - 51.4 - 14.6 - 2.97 - 0.48		PC(16:0/22:5(4Z,7Z,10Z,13Z,16Z))	http://nonlinear.com/redirect/outbound?p=hmdb&param=YMDB01857	852.577	1	18.4623	0.012327	0.104208	12.6279	V1 37
18.46_852.5770m/z	YMDB01858		M+FA-H	C46H82NO8P	38.2	9.92	1.26336	82.3638	100 - 51.4 - 14.6 - 2.97 - 0.48		PC(16:0/22:5(7Z,10Z,13Z,16Z,19Z))	http://nonlinear.com/redirect/outbound?p=hmdb&param=YMDB01858	852.577	1	18.4623	0.012327	0.104208	12.6279	V1 37
18.46_852.5770m/z	YMDB01879		M+FA-H	C46H82NO8P	38.5	11.5	1.26336	82.3638	100 - 51.4 - 14.6 - 2.97 - 0.48		PC(16:1(9Z)/22:4(7Z,10Z,13Z,16Z))	http://nonlinear.com/redirect/outbound?p=hmdb&param=YMDB01879	852.577	1	18.4623	0.012327	0.104208	12.6279	V1 37
18.46_852.5770m/z	YMDB01899		M+FA-H	C46H82NO8P	38.2	9.92	1.26336	82.3638	100 - 51.4 - 14.6 - 2.97 - 0.48		PC(18:0/20:5(5Z,8Z,11Z,14Z,17Z))	http://nonlinear.com/redirect/outbound?p=hmdb&param=YMDB01899	852.577	1	18.4623	0.012327	0.104208	12.6279	V1 37
18.46_852.5770m/z	YMDB01920		M+FA-H	C46H82NO8P	38.3	10.8	1.26336	82.3638	100 - 51.4 - 14.6 - 2.97 - 0.48		PC(18:1(11Z)/20:4(5Z,8Z,11Z,14Z))	http://nonlinear.com/redirect/outbound?p=hmdb&param=YMDB01920	852.577	1	18.4623	0.012327	0.104208	12.6279	V1 37
18.46_852.5770m/z	YMDB01921		M+FA-H	C46H82NO8P	38.3	10.7	1.26336	82.3638	100 - 51.4 - 14.6 - 2.97 - 0.48		PC(18:1(11Z)/20:4(8Z,11Z,14Z,17Z))	http://nonlinear.com/redirect/outbound?p=hmdb&param=YMDB01921	852.577	1	18.4623	0.012327	0.104208	12.6279	V1 37
18.46_852.5770m/z	YMDB01944		M+FA-H	C46H82NO8P	38.3	10.8	1.26336	82.3638	100 - 51.4 - 14.6 - 2.97 - 0.48		PC(18:1(9Z)/20:4(5Z,8Z,11Z,14Z))	http://nonlinear.com/redirect/outbound?p=hmdb&param=YMDB01944	852.577	1	18.4623	0.012327	0.104208	12.6279	V1 37
18.46_852.5770m/z	YMDB01945		M+FA-H	C46H82NO8P	38.3	10.7	1.26336	82.3638	100 - 51.4 - 14.6 - 2.97 - 0.48		PC(18:1(9Z)/20:4(8Z,11Z,14Z,17Z))	http://nonlinear.com/redirect/outbound?p=hmdb&param=YMDB01945	852.577	1	18.4623	0.012327	0.104208	12.6279	V1 37
18.46_852.5770m/z	YMDB01962		M+FA-H	C46H82NO8P	38.5	11.8	1.26336	82.3638	100 - 51.4 - 14.6 - 2.97 - 0.48		PC(18:2(9Z,12Z)/20:3(5Z,8Z,11Z))	http://nonlinear.com/redirect/outbound?p=hmdb&param=YMDB01962	852.577	1	18.4623	0.012327	0.104208	12.6279	V1 37
18.46_852.5770m/z	YMDB01968		M+FA-H	C46H82NO8P	38.5	11.8	1.26336	82.3638	100 - 51.4 - 14.6 - 2.97 - 0.48		PC(18:2(9Z,12Z)/20:3(8Z,11Z,14Z))	http://nonlinear.com/redirect/outbound?p=hmdb&param=YMDB01968	852.577	1	18.4623	0.012327	0.104208	12.6279	V1 37
18.46_852.5770m/z	YMDB01989		M+FA-H	C46H82NO8P	38.6	12.1	1.26336	82.3638	100 - 51.4 - 14.6 - 2.97 - 0.48		PC(18:3(6Z,9Z,12Z)/20:2(11Z,14Z))	http://nonlinear.com/redirect/outbound?p=hmdb&param=YMDB01989	852.577	1	18.4623	0.012327	0.104208	12.6279	V1 37
18.46_852.5770m/z	YMDB02010		M+FA-H	C46H82NO8P	38.6	12.1	1.26336	82.3638	100 - 51.4 - 14.6 - 2.97 - 0.48		PC(18:3(9Z,12Z,15Z)/20:2(11Z,14Z))	http://nonlinear.com/redirect/outbound?p=hmdb&param=YMDB02010	852.577	1	18.4623	0.012327	0.104208	12.6279	V1 37
18.46_852.5770m/z	YMDB02027		M+FA-H	C46H82NO8P	38.4	11	1.26336	82.3638	100 - 51.4 - 14.6 - 2.97 - 0.48		PC(18:4(6Z,9Z,12Z,15Z)/20:1(11Z))	http://nonlinear.com/redirect/outbound?p=hmdb&param=YMDB02027	852.577	1	18.4623	0.012327	0.104208	12.6279	V1 37
18.46_852.5770m/z	YMDB02057		M+FA-H	C46H82NO8P	38.4	11	1.26336	82.3638	100 - 51.4 - 14.6 - 2.97 - 0.48		PC(20:1(11Z)/18:4(6Z,9Z,12Z,15Z))	http://nonlinear.com/redirect/outbound?p=hmdb&param=YMDB02057	852.577	1	18.4623	0.012327	0.104208	12.6279	V1 37
18.46_852.5770m/z	YMDB02074		M+FA-H	C46H82NO8P	38.6	12.1	1.26336	82.3638	100 - 51.4 - 14.6 - 2.97 - 0.48		PC(20:2(11Z,14Z)/18:3(6Z,9Z,12Z))	http://nonlinear.com/redirect/outbound?p=hmdb&param=YMDB02074	852.577	1	18.4623	0.012327	0.104208	12.6279	V1 37
18.46_852.5770m/z	YMDB02075		M+FA-H	C46H82NO8P	38.6	12.1	1.26336	82.3638	100 - 51.4 - 14.6 - 2.97 - 0.48		PC(20:2(11Z,14Z)/18:3(9Z,12Z,15Z))	http://nonlinear.com/redirect/outbound?p=hmdb&param=YMDB02075	852.577	1	18.4623	0.012327	0.104208	12.6279	V1 37
18.46_852.5770m/z	YMDB02094		M+FA-H	C46H82NO8P	38.5	11.8	1.26336	82.3638	100 - 51.4 - 14.6 - 2.97 - 0.48		PC(20:3(5Z,8Z,11Z)/18:2(9Z,12Z))	http://nonlinear.com/redirect/outbound?p=hmdb&param=YMDB02094	852.577	1	18.4623	0.012327	0.104208	12.6279	V1 37
18.46_852.5770m/z	YMDB02112		M+FA-H	C46H82NO8P	38.5	11.8	1.26336	82.3638	100 - 51.4 - 14.6 - 2.97 - 0.48		PC(20:3(8Z,11Z,14Z)/18:2(9Z,12Z))	http://nonlinear.com/redirect/outbound?p=hmdb&param=YMDB02112	852.577	1	18.4623	0.012327	0.104208	12.6279	V1 37
18.46_852.5770m/z	YMDB02124		M+FA-H	C46H82NO8P	38.3	10.8	1.26336	82.3638	100 - 51.4 - 14.6 - 2.97 - 0.48		PC(20:4(5Z,8Z,11Z,14Z)/18:1(11Z))	http://nonlinear.com/redirect/outbound?p=hmdb&param=YMDB02124	852.577	1	18.4623	0.012327	0.104208	12.6279	V1 37
18.46_852.5770m/z	YMDB02125		M+FA-H	C46H82NO8P	38.3	10.8	1.26336	82.3638	100 - 51.4 - 14.6 - 2.97 - 0.48		PC(20:4(5Z,8Z,11Z,14Z)/18:1(9Z))	http://nonlinear.com/redirect/outbound?p=hmdb&param=YMDB02125	852.577	1	18.4623	0.012327	0.104208	12.6279	V1 37
18.46_852.5770m/z	YMDB02134		M+FA-H	C46H82NO8P	38.3	10.7	1.26336	82.3638	100 - 51.4 - 14.6 - 2.97 - 0.48		PC(20:4(8Z,11Z,14Z,17Z)/18:1(11Z))	http://nonlinear.com/redirect/outbound?p=hmdb&param=YMDB02134	852.577	1	18.4623	0.012327	0.104208	12.6279	V1 37
19.17_714.5080m/z	YMDB01203		M-H	C39H74NO8P	48.2	49.9	0.034106	90.8649	100 - 43.7 - 11 - 2.01 - 0.296		PE(16:1(9Z)/18:1(9Z))	http://nonlinear.com/redirect/outbound?p=hmdb&param=YMDB01203	714.508	1	19.1715	0.00256465	0.0550261	11.6203	V1 37
17.91_758.4990m/z	YMDB01255		M-H	C40H74NO10P	51.9	74.5	1.66907	87.2231	100 - 44.9 - 11.9 - 2.32 - 0.367		PS(16:1(9Z)/18:1(9Z))	http://nonlinear.com/redirect/outbound?p=hmdb&param=YMDB01255	758.499	1	17.9078	5.7e-05	0.0070975	11.6128	V1 37
19.27_861.5504m/z	YMDB01244		M-H	C45H83O13P	41.1	18.4	0.598553	87.7344	100 - 50.1 - 15 - 3.31 - 0.592		PI(18:1(9Z)/18:1(9Z))	http://nonlinear.com/redirect/outbound?p=hmdb&param=YMDB01244	861.55	1	19.2742	0.0128711	0.106308	11.4821	V1 37
20.21_744.5560m/z	YMDB01206		M-H	C41H80NO8P	37.7	4.32	1.45656	86.0844	100 - 45.9 - 12 - 2.26 - 0.342		PE(18:0/18:1(9Z))	http://nonlinear.com/redirect/outbound?p=hmdb&param=YMDB01206	744.556	1	20.2052	0.0422129	0.196991	10.3523	V1 37
20.63_810.5278m/z	YMDB01257		M+Na-2H	C42H80NO10P	46.6	47.9	1.46632	86.9939	100 - 47.1 - 12.9 - 2.59 - 0.42		PS(18:0/18:1(9Z))	http://nonlinear.com/redirect/outbound?p=hmdb&param=YMDB01257	810.528	1	20.633	0.0390525	0.189836	10.2007	V1 37
7.65_522.3561m/z	YMDB01190		M+H	C26H52NO7P	44	24	1.30011	97.5178	100 - 29.4 - 5.59 - 0.799		PC(18:1(9Z)/0:0)		522.356	1	7.65488	0.0186048	0.030243	9.75241	V1 37
7.65_522.3561m/z	YMDB01810		M+H	C26H52NO7P	44	24	1.30011	97.5178	100 - 29.4 - 5.59 - 0.799		LysoPC(18:1(9Z))		522.356	1	7.65488	0.0186048	0.030243	9.75241	V1 37
7.65_522.3561m/z	YMDB02211		M+H	C26H52NO7P	44	24	1.30011	97.5178	100 - 29.4 - 5.59 - 0.799		LysoPC(18:1(11Z))		522.356	1	7.65488	0.0186048	0.030243	9.75241	V1 37
20.21_804.5760m/z	YMDB01183		M+FA-H	C42H82NO8P	50.2	59.8	-0.0222733	91.322	100 - 47 - 12.5 - 2.39 - 0.367		PC(16:0/18:1(9Z))	http://nonlinear.com/redirect/outbound?p=hmdb&param=YMDB01183	804.576	1	20.2052	0.0300404	0.167387	9.14607	V1 37
20.21_804.5760m/z	YMDB01815		M+FA-H	C42H82NO8P	50.3	60	-0.0222733	91.322	100 - 47 - 12.5 - 2.39 - 0.367		PC(14:0/20:1(11Z))	http://nonlinear.com/redirect/outbound?p=hmdb&param=YMDB01815	804.576	1	20.2052	0.0300404	0.167387	9.14607	V1 37
20.21_804.5760m/z	YMDB01832		M+FA-H	C42H82NO8P	50.3	60	-0.0222733	91.322	100 - 47 - 12.5 - 2.39 - 0.367		PC(14:1(9Z)/20:0)	http://nonlinear.com/redirect/outbound?p=hmdb&param=YMDB01832	804.576	1	20.2052	0.0300404	0.167387	9.14607	V1 37
20.21_804.5760m/z	YMDB01844		M+FA-H	C42H82NO8P	50.2	59.8	-0.0222733	91.322	100 - 47 - 12.5 - 2.39 - 0.367		PC(16:0/18:1(11Z))	http://nonlinear.com/redirect/outbound?p=hmdb&param=YMDB01844	804.576	1	20.2052	0.0300404	0.167387	9.14607	V1 37
20.21_804.5760m/z	YMDB01865		M+FA-H	C42H82NO8P	50.3	60.1	-0.0222733	91.322	100 - 47 - 12.5 - 2.39 - 0.367		PC(16:1(9Z)/18:0)	http://nonlinear.com/redirect/outbound?p=hmdb&param=YMDB01865	804.576	1	20.2052	0.0300404	0.167387	9.14607	V1 37
20.21_804.5760m/z	YMDB01889		M+FA-H	C42H82NO8P	50.3	60.1	-0.0222733	91.322	100 - 47 - 12.5 - 2.39 - 0.367		PC(18:0/16:1(9Z))	http://nonlinear.com/redirect/outbound?p=hmdb&param=YMDB01889	804.576	1	20.2052	0.0300404	0.167387	9.14607	V1 37
20.21_804.5760m/z	YMDB01908		M+FA-H	C42H82NO8P	50.2	59.8	-0.0222733	91.322	100 - 47 - 12.5 - 2.39 - 0.367		PC(18:1(11Z)/16:0)	http://nonlinear.com/redirect/outbound?p=hmdb&param=YMDB01908	804.576	1	20.2052	0.0300404	0.167387	9.14607	V1 37
20.21_804.5760m/z	YMDB01933		M+FA-H	C42H82NO8P	50.2	59.8	-0.0222733	91.322	100 - 47 - 12.5 - 2.39 - 0.367		PC(18:1(9Z)/16:0)	http://nonlinear.com/redirect/outbound?p=hmdb&param=YMDB01933	804.576	1	20.2052	0.0300404	0.167387	9.14607	V1 37
20.21_804.5760m/z	YMDB02036		M+FA-H	C42H82NO8P	50.3	60	-0.0222733	91.322	100 - 47 - 12.5 - 2.39 - 0.367		PC(20:0/14:1(9Z))	http://nonlinear.com/redirect/outbound?p=hmdb&param=YMDB02036	804.576	1	20.2052	0.0300404	0.167387	9.14607	V1 37
20.21_804.5760m/z	YMDB02050		M+FA-H	C42H82NO8P	50.3	60	-0.0222733	91.322	100 - 47 - 12.5 - 2.39 - 0.367		PC(20:1(11Z)/14:0)	http://nonlinear.com/redirect/outbound?p=hmdb&param=YMDB02050	804.576	1	20.2052	0.0300404	0.167387	9.14607	V1 37
20.62_742.5397m/z	YMDB01208		M-H	C41H78NO8P	51.3	68.5	0.625443	88.7334	100 - 45.9 - 11.9 - 2.26 - 0.342		PE(18:1(9Z)/18:1(9Z))	http://nonlinear.com/redirect/outbound?p=hmdb&param=YMDB01208	742.54	1	20.6159	0.015197	0.116965	8.59962	V1 37
7.84_480.3092m/z	YMDB01207		M+H	C23H46NO7P	48.4	50.3	1.5456	93.5322	100 - 26 - 4.69 - 0.634		PE(18:1(9Z)/0:0)		480.309	1	7.84322	0.0280907	0.0402498	8.57112	V1 37
14.05_751.4421m/z	YMDB01221		M-H	C37H69O13P	35.7	0	2.32351	81.4473	100 - 41.3 - 11 - 2.19 - 0.358		PI(12:0/16:1(9Z))	http://nonlinear.com/redirect/outbound?p=hmdb&param=YMDB01221	751.442	1	14.0524	0.0298964	0.167083	8.49673	V1 37
14.05_751.4421m/z	YMDB01225		M-H	C37H69O13P	35.7	0	2.32351	81.4473	100 - 41.3 - 11 - 2.19 - 0.358		PI(14:0/14:1(9Z))	http://nonlinear.com/redirect/outbound?p=hmdb&param=YMDB01225	751.442	1	14.0524	0.0298964	0.167083	8.49673	V1 37
7.64_496.3405m/z	YMDB01179		M+H	C24H50NO7P	43.8	24.9	1.39186	95.9655	100 - 27.2 - 4.99 - 0.687		PC(16:0/0:0)		496.34	1	7.63778	0.0338577	0.045892	8.20857	V1 37
17.98_833.5190m/z	YMDB01239		M-H	C43H79O13P	42	17	0.489145	93.4024	100 - 47.9 - 13.9 - 2.99 - 0.524		PI(16:1(9Z)/18:1(9Z))	http://nonlinear.com/redirect/outbound?p=hmdb&param=YMDB01239	833.519	1	17.9763	0.0207801	0.142606	7.51821	V1 37
20.50_716.5241m/z	YMDB01200		M-H	C39H76NO8P	47.5	49.7	0.716076	88.5833	100 - 43.7 - 11 - 2.01 - 0.296		PE(16:0/18:1(9Z))	http://nonlinear.com/redirect/outbound?p=hmdb&param=YMDB01200	716.524	1	20.4961	0.0252106	0.154456	7.24353	V1 37
20.50_716.5241m/z	YMDB01205		M-H	C39H76NO8P	43.1	27.9	0.716076	88.5833	100 - 43.7 - 11 - 2.01 - 0.296		PE(18:0/16:1(9Z))	http://nonlinear.com/redirect/outbound?p=hmdb&param=YMDB01205	716.524	1	20.4961	0.0252106	0.154456	7.24353	V1 37
21.62_788.6165m/z	YMDB01189		M+H	C44H86NO8P	37.8	0.353	0.110036	89.0231	100 - 49.2 - 13.5 - 2.67 - 0.422		PC(18:0/18:1(9Z))		788.616	1	21.6158	0.000421187	0.00355159	7.10826	V1 37
21.62_788.6165m/z	YMDB01821		M+H	C44H86NO8P	37.8	0.353	0.110036	89.0231	100 - 49.2 - 13.5 - 2.67 - 0.422		PC(14:0/22:1(13Z))		788.616	1	21.6158	0.000421187	0.00355159	7.10826	V1 37
21.62_788.6165m/z	YMDB01837		M+H	C44H86NO8P	37.8	0.353	0.110036	89.0231	100 - 49.2 - 13.5 - 2.67 - 0.422		PC(14:1(9Z)/22:0)		788.616	1	21.6158	0.000421187	0.00355159	7.10826	V1 37
21.62_788.6165m/z	YMDB01849		M+H	C44H86NO8P	37.8	0.353	0.110036	89.0231	100 - 49.2 - 13.5 - 2.67 - 0.422		PC(16:0/20:1(11Z))		788.616	1	21.6158	0.000421187	0.00355159	7.10826	V1 37
21.62_788.6165m/z	YMDB01870		M+H	C44H86NO8P	37.8	0.353	0.110036	89.0231	100 - 49.2 - 13.5 - 2.67 - 0.422		PC(16:1(9Z)/20:0)		788.616	1	21.6158	0.000421187	0.00355159	7.10826	V1 37
21.62_788.6165m/z	YMDB01890		M+H	C44H86NO8P	37.8	0.353	0.110036	89.0231	100 - 49.2 - 13.5 - 2.67 - 0.422		PC(18:0/18:1(11Z))		788.616	1	21.6158	0.000421187	0.00355159	7.10826	V1 37
21.62_788.6165m/z	YMDB01910		M+H	C44H86NO8P	37.8	0.353	0.110036	89.0231	100 - 49.2 - 13.5 - 2.67 - 0.422		PC(18:1(11Z)/18:0)		788.616	1	21.6158	0.000421187	0.00355159	7.10826	V1 37
21.62_788.6165m/z	YMDB01935		M+H	C44H86NO8P	37.8	0.353	0.110036	89.0231	100 - 49.2 - 13.5 - 2.67 - 0.422		PC(18:1(9Z)/18:0)		788.616	1	21.6158	0.000421187	0.00355159	7.10826	V1 37
21.62_788.6165m/z	YMDB02037		M+H	C44H86NO8P	37.8	0.353	0.110036	89.0231	100 - 49.2 - 13.5 - 2.67 - 0.422		PC(20:0/16:1(9Z))		788.616	1	21.6158	0.000421187	0.00355159	7.10826	V1 37
21.62_788.6165m/z	YMDB02052		M+H	C44H86NO8P	37.8	0.353	0.110036	89.0231	100 - 49.2 - 13.5 - 2.67 - 0.422		PC(20:1(11Z)/16:0)		788.616	1	21.6158	0.000421187	0.00355159	7.10826	V1 37
21.62_788.6165m/z	YMDB02147		M+H	C44H86NO8P	37.8	0.353	0.110036	89.0231	100 - 49.2 - 13.5 - 2.67 - 0.422		PC(22:0/14:1(9Z))		788.616	1	21.6158	0.000421187	0.00355159	7.10826	V1 37
21.62_788.6165m/z	YMDB02156		M+H	C44H86NO8P	37.8	0.353	0.110036	89.0231	100 - 49.2 - 13.5 - 2.67 - 0.422		PC(22:1(13Z)/14:0)		788.616	1	21.6158	0.000421187	0.00355159	7.10826	V1 37
21.99_857.7583m/z	YMDB01307		M+H	C55H100O6	37.9	0	-1.13243	90.9705	100 - 60.9 - 19.4 - 4.31 - 0.745 - 0.106		TG(16:1(9Z)/18:1(9Z)/18:1(9Z))		857.758	1	21.9925	0.0206736	0.0323789	6.70919	V1 37
14.45_777.4564m/z	YMDB01231		M-H	C39H71O13P	36.8	0	0.540046	84.6128	100 - 43.5 - 11.9 - 2.43 - 0.408		PI(14:1(9Z)/16:1(9Z))	http://nonlinear.com/redirect/outbound?p=hmdb&param=YMDB01231	777.456	1	14.446	0.00713016	0.0814385	6.551	V1 37
9.93_568.3624m/z	YMDB01187		M+FA-H	C26H54NO7P	49.1	54	0.775375	92.2625	100 - 29.4 - 5.6 - 0.801		PC(18:0/0:0)	http://nonlinear.com/redirect/outbound?p=hmdb&param=YMDB01187	568.362	1	9.9271	0.0292087	0.166026	5.99783	V1 37
20.19_760.5856m/z	YMDB01183		M+H	C42H82NO8P	37.4	1.39	0.633931	86.4127	100 - 47 - 12.5 - 2.39 - 0.367		PC(16:0/18:1(9Z))		760.586	1	20.1884	0.00238877	0.00900197	5.92518	V1 37
20.19_760.5856m/z	YMDB01815		M+H	C42H82NO8P	37.1	0.0111	0.633931	86.4127	100 - 47 - 12.5 - 2.39 - 0.367		PC(14:0/20:1(11Z))		760.586	1	20.1884	0.00238877	0.00900197	5.92518	V1 37
20.19_760.5856m/z	YMDB01832		M+H	C42H82NO8P	37.1	0.0111	0.633931	86.4127	100 - 47 - 12.5 - 2.39 - 0.367		PC(14:1(9Z)/20:0)		760.586	1	20.1884	0.00238877	0.00900197	5.92518	V1 37
20.19_760.5856m/z	YMDB01844		M+H	C42H82NO8P	37.4	1.39	0.633931	86.4127	100 - 47 - 12.5 - 2.39 - 0.367		PC(16:0/18:1(11Z))		760.586	1	20.1884	0.00238877	0.00900197	5.92518	V1 37
20.19_760.5856m/z	YMDB01865		M+H	C42H82NO8P	37.2	0.216	0.633931	86.4127	100 - 47 - 12.5 - 2.39 - 0.367		PC(16:1(9Z)/18:0)		760.586	1	20.1884	0.00238877	0.00900197	5.92518	V1 37
20.19_760.5856m/z	YMDB01889		M+H	C42H82NO8P	37.2	0.216	0.633931	86.4127	100 - 47 - 12.5 - 2.39 - 0.367		PC(18:0/16:1(9Z))		760.586	1	20.1884	0.00238877	0.00900197	5.92518	V1 37
20.19_760.5856m/z	YMDB01908		M+H	C42H82NO8P	37.4	1.39	0.633931	86.4127	100 - 47 - 12.5 - 2.39 - 0.367		PC(18:1(11Z)/16:0)		760.586	1	20.1884	0.00238877	0.00900197	5.92518	V1 37
20.19_760.5856m/z	YMDB01933		M+H	C42H82NO8P	37.4	1.39	0.633931	86.4127	100 - 47 - 12.5 - 2.39 - 0.367		PC(18:1(9Z)/16:0)		760.586	1	20.1884	0.00238877	0.00900197	5.92518	V1 37
20.19_760.5856m/z	YMDB02036		M+H	C42H82NO8P	37.1	0.0111	0.633931	86.4127	100 - 47 - 12.5 - 2.39 - 0.367		PC(20:0/14:1(9Z))		760.586	1	20.1884	0.00238877	0.00900197	5.92518	V1 37
20.19_760.5856m/z	YMDB02050		M+H	C42H82NO8P	37.1	0.0111	0.633931	86.4127	100 - 47 - 12.5 - 2.39 - 0.367		PC(20:1(11Z)/14:0)		760.586	1	20.1884	0.00238877	0.00900197	5.92518	V1 37
17.96_780.4810m/z	YMDB01255		M+Na-2H	C40H74NO10P	50.7	66.3	1.76031	89.3365	100 - 44.9 - 11.9 - 2.32 - 0.367		PS(16:1(9Z)/18:1(9Z))	http://nonlinear.com/redirect/outbound?p=hmdb&param=YMDB01255	780.481	1	17.9592	0.0188789	0.131985	5.90032	V1 37
9.04_382.2728m/z	YMDB00299		M+H	C18H40NO5P	38.6	5.76	2.79292	90.4218	100 - 20.5 - 3.02 - 0.332		Sphinganine 1-phosphate		382.273	1	9.03783	0.00662075	0.0161514	5.17951	V1 37
17.77_833.5188m/z	YMDB01239		M-H	C43H79O13P	45	38.2	0.325291	87.2864	100 - 47.9 - 13.9 - 2.99 - 0.524		PI(16:1(9Z)/18:1(9Z))	http://nonlinear.com/redirect/outbound?p=hmdb&param=YMDB01239	833.519	1	17.7709	0.0229668	0.14772	5.12996	V1 37
22.05_852.8033m/z	YMDB01285		M+NH4	C53H102O6	38.3	0	2.20882	94.3399	100 - 58.7 - 18.2 - 3.92 - 0.659		TG(16:0/16:0/18:0)		852.803	1	22.0507	0.0173669	0.0289105	4.98387	V1 37
22.51_569.4338m/z	YMDB01519		M+H	C40H56O2	39	4.79	-2.67595	93.5184	100 - 44 - 9.85 - 1.5 - 0.173		Lutein		569.434	1	22.5127	1.44818e-05	0.00108121	4.87068	V1 37
18.36_738.5082m/z	YMDB01200		M+Na-2H	C39H76NO8P	47.7	49.9	3.74921	92.8244	100 - 43.7 - 11 - 2.01 - 0.296		PE(16:0/18:1(9Z))	http://nonlinear.com/redirect/outbound?p=hmdb&param=YMDB01200	738.508	1	18.3596	0.00716151	0.0814385	4.8641	V1 37
18.36_738.5082m/z	YMDB01205		M+Na-2H	C39H76NO8P	47.2	47.7	3.74921	92.8244	100 - 43.7 - 11 - 2.01 - 0.296		PE(18:0/16:1(9Z))	http://nonlinear.com/redirect/outbound?p=hmdb&param=YMDB01205	738.508	1	18.3596	0.00716151	0.0814385	4.8641	V1 37
19.07_744.5542m/z	YMDB01208		M+H	C41H78NO8P	36	0.468	0.630015	80.4243	100 - 45.9 - 11.9 - 2.26 - 0.342		PE(18:1(9Z)/18:1(9Z))		744.554	1	19.0691	0.000444028	0.00361293	4.53593	V1 37
8.60_396.3096m/z	YMDB01535		M+H	C23H41NO4	38	8.94	-3.02962	84.8929	100 - 25.9 - 4.03 - 0.467		9,12-Hexadecadienylcarnitine		396.31	1	8.60308	0.00703422	0.0167555	4.48927	V1 37
17.98_834.5267n	YMDB01239		M+H, M+NH4	C43H79O13P	42.8	23.2	0.986897	91.7317	100 - 47.9 - 13.9 - 2.99 - 0.524		PI(16:1(9Z)/18:1(9Z))	834.527	852.561	1	17.977	0.000521339	0.00387008	4.08642	V1 37
20.58_812.6152m/z	YMDB01878		M+H	C46H86NO8P	36.1	3.59	-1.5144	78.8456	100 - 51.4 - 14.6 - 2.97 - 0.481		PC(16:1(9Z)/22:2(13Z,16Z))		812.615	1	20.5821	0.00612851	0.0154073	3.90125	V1 37
20.58_812.6152m/z	YMDB01895		M+H	C46H86NO8P	36.1	3.66	-1.5144	78.8456	100 - 51.4 - 14.6 - 2.97 - 0.481		PC(18:0/20:3(5Z,8Z,11Z))		812.615	1	20.5821	0.00612851	0.0154073	3.90125	V1 37
20.58_812.6152m/z	YMDB01896		M+H	C46H86NO8P	36.3	4.54	-1.5144	78.8456	100 - 51.4 - 14.6 - 2.97 - 0.481		PC(18:0/20:3(8Z,11Z,14Z))		812.615	1	20.5821	0.00612851	0.0154073	3.90125	V1 37
20.58_812.6152m/z	YMDB01917		M+H	C46H86NO8P	36.2	3.84	-1.5144	78.8456	100 - 51.4 - 14.6 - 2.97 - 0.481		PC(18:1(11Z)/20:2(11Z,14Z))		812.615	1	20.5821	0.00612851	0.0154073	3.90125	V1 37
20.58_812.6152m/z	YMDB01941		M+H	C46H86NO8P	36.2	3.84	-1.5144	78.8456	100 - 51.4 - 14.6 - 2.97 - 0.481		PC(18:1(9Z)/20:2(11Z,14Z))		812.615	1	20.5821	0.00612851	0.0154073	3.90125	V1 37
20.58_812.6152m/z	YMDB01966		M+H	C46H86NO8P	36.2	3.84	-1.5144	78.8456	100 - 51.4 - 14.6 - 2.97 - 0.481		PC(18:2(9Z,12Z)/20:1(11Z))		812.615	1	20.5821	0.00612851	0.0154073	3.90125	V1 37
20.58_812.6152m/z	YMDB01987		M+H	C46H86NO8P	36.3	4.48	-1.5144	78.8456	100 - 51.4 - 14.6 - 2.97 - 0.481		PC(18:3(6Z,9Z,12Z)/20:0)		812.615	1	20.5821	0.00612851	0.0154073	3.90125	V1 37
20.58_812.6152m/z	YMDB02008		M+H	C46H86NO8P	37.6	10.7	-1.5144	78.8456	100 - 51.4 - 14.6 - 2.97 - 0.481		PC(18:3(9Z,12Z,15Z)/20:0)		812.615	1	20.5821	0.00612851	0.0154073	3.90125	V1 37
20.58_812.6152m/z	YMDB02038		M+H	C46H86NO8P	36.3	4.48	-1.5144	78.8456	100 - 51.4 - 14.6 - 2.97 - 0.481		PC(20:0/18:3(6Z,9Z,12Z))		812.615	1	20.5821	0.00612851	0.0154073	3.90125	V1 37
20.58_812.6152m/z	YMDB02039		M+H	C46H86NO8P	37.6	10.7	-1.5144	78.8456	100 - 51.4 - 14.6 - 2.97 - 0.481		PC(20:0/18:3(9Z,12Z,15Z))		812.615	1	20.5821	0.00612851	0.0154073	3.90125	V1 37
20.58_812.6152m/z	YMDB02054		M+H	C46H86NO8P	36.2	3.84	-1.5144	78.8456	100 - 51.4 - 14.6 - 2.97 - 0.481		PC(20:1(11Z)/18:2(9Z,12Z))		812.615	1	20.5821	0.00612851	0.0154073	3.90125	V1 37
20.58_812.6152m/z	YMDB02071		M+H	C46H86NO8P	36.2	3.84	-1.5144	78.8456	100 - 51.4 - 14.6 - 2.97 - 0.481		PC(20:2(11Z,14Z)/18:1(11Z))		812.615	1	20.5821	0.00612851	0.0154073	3.90125	V1 37
20.58_812.6152m/z	YMDB02072		M+H	C46H86NO8P	36.2	3.84	-1.5144	78.8456	100 - 51.4 - 14.6 - 2.97 - 0.481		PC(20:2(11Z,14Z)/18:1(9Z))		812.615	1	20.5821	0.00612851	0.0154073	3.90125	V1 37
20.58_812.6152m/z	YMDB02091		M+H	C46H86NO8P	36.1	3.66	-1.5144	78.8456	100 - 51.4 - 14.6 - 2.97 - 0.481		PC(20:3(5Z,8Z,11Z)/18:0)		812.615	1	20.5821	0.00612851	0.0154073	3.90125	V1 37
20.58_812.6152m/z	YMDB02109		M+H	C46H86NO8P	36.3	4.54	-1.5144	78.8456	100 - 51.4 - 14.6 - 2.97 - 0.481		PC(20:3(8Z,11Z,14Z)/18:0)		812.615	1	20.5821	0.00612851	0.0154073	3.90125	V1 37
20.58_812.6152m/z	YMDB02171		M+H	C46H86NO8P	36.1	3.59	-1.5144	78.8456	100 - 51.4 - 14.6 - 2.97 - 0.481		PC(22:2(13Z,16Z)/16:1(9Z))		812.615	1	20.5821	0.00612851	0.0154073	3.90125	V1 37
18.67_732.5536m/z	YMDB01181		M+H	C40H78NO8P	39.1	0	-0.262874	95.6179	100 - 44.8 - 11.5 - 2.13 - 0.319		PC(16:0/16:1(9Z))		732.554	1	18.6686	0.00236168	0.00891849	3.74898	V1 37
18.67_732.5536m/z	YMDB01813		M+H	C40H78NO8P	39.1	0	-0.262874	95.6179	100 - 44.8 - 11.5 - 2.13 - 0.319		PC(14:0/18:1(11Z))		732.554	1	18.6686	0.00236168	0.00891849	3.74898	V1 37
18.67_732.5536m/z	YMDB01814		M+H	C40H78NO8P	39.1	0	-0.262874	95.6179	100 - 44.8 - 11.5 - 2.13 - 0.319		PC(14:0/18:1(9Z))		732.554	1	18.6686	0.00236168	0.00891849	3.74898	V1 37
18.67_732.5536m/z	YMDB01831		M+H	C40H78NO8P	39.1	0	-0.262874	95.6179	100 - 44.8 - 11.5 - 2.13 - 0.319		PC(14:1(9Z)/18:0)		732.554	1	18.6686	0.00236168	0.00891849	3.74898	V1 37
18.67_732.5536m/z	YMDB01864		M+H	C40H78NO8P	39.1	0	-0.262874	95.6179	100 - 44.8 - 11.5 - 2.13 - 0.319		PC(16:1(9Z)/16:0)		732.554	1	18.6686	0.00236168	0.00891849	3.74898	V1 37
18.67_732.5536m/z	YMDB01888		M+H	C40H78NO8P	39.1	0.424	-0.262874	95.6179	100 - 44.8 - 11.5 - 2.13 - 0.319		PC(18:0/14:1(9Z))		732.554	1	18.6686	0.00236168	0.00891849	3.74898	V1 37
18.67_732.5536m/z	YMDB01907		M+H	C40H78NO8P	39.1	0.415	-0.262874	95.6179	100 - 44.8 - 11.5 - 2.13 - 0.319		PC(18:1(11Z)/14:0)		732.554	1	18.6686	0.00236168	0.00891849	3.74898	V1 37
18.67_732.5536m/z	YMDB01932		M+H	C40H78NO8P	39.1	0.415	-0.262874	95.6179	100 - 44.8 - 11.5 - 2.13 - 0.319		PC(18:1(9Z)/14:0)		732.554	1	18.6686	0.00236168	0.00891849	3.74898	V1 37
22.43_878.8187m/z	YMDB01276		M+NH4	C55H104O6	36.4	0.43	1.83369	83.9704	100 - 60.9 - 19.5 - 4.32 - 0.747 - 0.106		TG(14:0/16:1(9Z)/22:0)		878.819	1	22.4272	0.019614	0.0311973	3.46067	V1 37
22.43_878.8187m/z	YMDB01279		M+NH4	C55H104O6	36.5	0.581	1.83369	83.9704	100 - 60.9 - 19.5 - 4.32 - 0.747 - 0.106		TG(14:0/18:1(9Z)/20:0)		878.819	1	22.4272	0.019614	0.0311973	3.46067	V1 37
22.43_878.8187m/z	YMDB01292		M+NH4	C55H104O6	37.3	4.69	1.83369	83.9704	100 - 60.9 - 19.5 - 4.32 - 0.747 - 0.106		TG(16:0/18:0/18:1(9Z))		878.819	1	22.4272	0.019614	0.0311973	3.46067	V1 37
22.43_878.8187m/z	YMDB01305		M+NH4	C55H104O6	37.3	4.49	1.83369	83.9704	100 - 60.9 - 19.5 - 4.32 - 0.747 - 0.106		TG(16:1(9Z)/18:0/18:0)		878.819	1	22.4272	0.019614	0.0311973	3.46067	V1 37
18.84_758.5698m/z	YMDB01186		M+H	C42H80NO8P	39.3	0	0.544852	97.3581	100 - 47 - 12.5 - 2.39 - 0.367		PC(16:1(9Z)/18:1(9Z))		758.57	1	18.8397	0.0135432	0.0248194	3.41053	V1 37
18.84_758.5698m/z	YMDB01816		M+H	C42H80NO8P	39.3	0	0.544852	97.3581	100 - 47 - 12.5 - 2.39 - 0.367		PC(14:0/20:2(11Z,14Z))		758.57	1	18.8397	0.0135432	0.0248194	3.41053	V1 37
18.84_758.5698m/z	YMDB01833		M+H	C42H80NO8P	39.3	0	0.544852	97.3581	100 - 47 - 12.5 - 2.39 - 0.367		PC(14:1(9Z)/20:1(11Z))		758.57	1	18.8397	0.0135432	0.0248194	3.41053	V1 37
18.84_758.5698m/z	YMDB01845		M+H	C42H80NO8P	39.3	0	0.544852	97.3581	100 - 47 - 12.5 - 2.39 - 0.367		PC(16:0/18:2(9Z,12Z))		758.57	1	18.8397	0.0135432	0.0248194	3.41053	V1 37
18.84_758.5698m/z	YMDB01866		M+H	C42H80NO8P	39.3	0	0.544852	97.3581	100 - 47 - 12.5 - 2.39 - 0.367		PC(16:1(9Z)/18:1(11Z))		758.57	1	18.8397	0.0135432	0.0248194	3.41053	V1 37
18.84_758.5698m/z	YMDB01909		M+H	C42H80NO8P	39.3	0	0.544852	97.3581	100 - 47 - 12.5 - 2.39 - 0.367		PC(18:1(11Z)/16:1(9Z))		758.57	1	18.8397	0.0135432	0.0248194	3.41053	V1 37
18.84_758.5698m/z	YMDB01934		M+H	C42H80NO8P	39.3	0	0.544852	97.3581	100 - 47 - 12.5 - 2.39 - 0.367		PC(18:1(9Z)/16:1(9Z))		758.57	1	18.8397	0.0135432	0.0248194	3.41053	V1 37
18.84_758.5698m/z	YMDB01956		M+H	C42H80NO8P	39.3	0	0.544852	97.3581	100 - 47 - 12.5 - 2.39 - 0.367		PC(18:2(9Z,12Z)/16:0)		758.57	1	18.8397	0.0135432	0.0248194	3.41053	V1 37
18.84_758.5698m/z	YMDB02051		M+H	C42H80NO8P	39.3	0	0.544852	97.3581	100 - 47 - 12.5 - 2.39 - 0.367		PC(20:1(11Z)/14:1(9Z))		758.57	1	18.8397	0.0135432	0.0248194	3.41053	V1 37
18.84_758.5698m/z	YMDB02067		M+H	C42H80NO8P	39.3	0	0.544852	97.3581	100 - 47 - 12.5 - 2.39 - 0.367		PC(20:2(11Z,14Z)/14:0)		758.57	1	18.8397	0.0135432	0.0248194	3.41053	V1 37
18.82_780.5530m/z	YMDB01824		M+H	C44H78NO8P	39	11.5	-1.06067	84.995	100 - 49.2 - 13.5 - 2.66 - 0.419		PC(14:0/22:5(4Z,7Z,10Z,13Z,16Z))		780.553	1	18.8226	0.0168013	0.0282315	3.36832	V1 37
18.82_780.5530m/z	YMDB01825		M+H	C44H78NO8P	39	11.5	-1.06067	84.995	100 - 49.2 - 13.5 - 2.66 - 0.419		PC(14:0/22:5(7Z,10Z,13Z,16Z,19Z))		780.553	1	18.8226	0.0168013	0.0282315	3.36832	V1 37
18.82_780.5530m/z	YMDB01840		M+H	C44H78NO8P	39	11.5	-1.06067	84.995	100 - 49.2 - 13.5 - 2.66 - 0.419		PC(14:1(9Z)/22:4(7Z,10Z,13Z,16Z))		780.553	1	18.8226	0.0168013	0.0282315	3.36832	V1 37
18.82_780.5530m/z	YMDB01855		M+H	C44H78NO8P	39.2	12.1	-1.06067	84.995	100 - 49.2 - 13.5 - 2.66 - 0.419		PC(16:0/20:5(5Z,8Z,11Z,14Z,17Z))		780.553	1	18.8226	0.0168013	0.0282315	3.36832	V1 37
18.82_780.5530m/z	YMDB01875		M+H	C44H78NO8P	39.2	12.1	-1.06067	84.995	100 - 49.2 - 13.5 - 2.66 - 0.419		PC(16:1(9Z)/20:4(5Z,8Z,11Z,14Z))		780.553	1	18.8226	0.0168013	0.0282315	3.36832	V1 37
18.82_780.5530m/z	YMDB01876		M+H	C44H78NO8P	39.2	12.1	-1.06067	84.995	100 - 49.2 - 13.5 - 2.66 - 0.419		PC(16:1(9Z)/20:4(8Z,11Z,14Z,17Z))		780.553	1	18.8226	0.0168013	0.0282315	3.36832	V1 37
18.82_780.5530m/z	YMDB01916		M+H	C44H78NO8P	39	11.5	-1.06067	84.995	100 - 49.2 - 13.5 - 2.66 - 0.419		PC(18:1(11Z)/18:4(6Z,9Z,12Z,15Z))		780.553	1	18.8226	0.0168013	0.0282315	3.36832	V1 37
18.82_780.5530m/z	YMDB01940		M+H	C44H78NO8P	39	11.5	-1.06067	84.995	100 - 49.2 - 13.5 - 2.66 - 0.419		PC(18:1(9Z)/18:4(6Z,9Z,12Z,15Z))		780.553	1	18.8226	0.0168013	0.0282315	3.36832	V1 37
18.82_780.5530m/z	YMDB01963		M+H	C44H78NO8P	39	11.5	-1.06067	84.995	100 - 49.2 - 13.5 - 2.66 - 0.419		PC(18:2(9Z,12Z)/18:3(6Z,9Z,12Z))		780.553	1	18.8226	0.0168013	0.0282315	3.36832	V1 37
18.82_780.5530m/z	YMDB01964		M+H	C44H78NO8P	39	11.5	-1.06067	84.995	100 - 49.2 - 13.5 - 2.66 - 0.419		PC(18:2(9Z,12Z)/18:3(9Z,12Z,15Z))		780.553	1	18.8226	0.0168013	0.0282315	3.36832	V1 37
18.82_780.5530m/z	YMDB01984		M+H	C44H78NO8P	39	11.5	-1.06067	84.995	100 - 49.2 - 13.5 - 2.66 - 0.419		PC(18:3(6Z,9Z,12Z)/18:2(9Z,12Z))		780.553	1	18.8226	0.0168013	0.0282315	3.36832	V1 37
18.82_780.5530m/z	YMDB02005		M+H	C44H78NO8P	39	11.5	-1.06067	84.995	100 - 49.2 - 13.5 - 2.66 - 0.419		PC(18:3(9Z,12Z,15Z)/18:2(9Z,12Z))		780.553	1	18.8226	0.0168013	0.0282315	3.36832	V1 37
18.82_780.5530m/z	YMDB02023		M+H	C44H78NO8P	39	11.5	-1.06067	84.995	100 - 49.2 - 13.5 - 2.66 - 0.419		PC(18:4(6Z,9Z,12Z,15Z)/18:1(11Z))		780.553	1	18.8226	0.0168013	0.0282315	3.36832	V1 37
18.82_780.5530m/z	YMDB02024		M+H	C44H78NO8P	39	11.5	-1.06067	84.995	100 - 49.2 - 13.5 - 2.66 - 0.419		PC(18:4(6Z,9Z,12Z,15Z)/18:1(9Z))		780.553	1	18.8226	0.0168013	0.0282315	3.36832	V1 37
18.82_780.5530m/z	YMDB02123		M+H	C44H78NO8P	39.2	12.1	-1.06067	84.995	100 - 49.2 - 13.5 - 2.66 - 0.419		PC(20:4(5Z,8Z,11Z,14Z)/16:1(9Z))		780.553	1	18.8226	0.0168013	0.0282315	3.36832	V1 37
18.82_780.5530m/z	YMDB02133		M+H	C44H78NO8P	39.2	12.1	-1.06067	84.995	100 - 49.2 - 13.5 - 2.66 - 0.419		PC(20:4(8Z,11Z,14Z,17Z)/16:1(9Z))		780.553	1	18.8226	0.0168013	0.0282315	3.36832	V1 37
18.82_780.5530m/z	YMDB02139		M+H	C44H78NO8P	39.2	12.1	-1.06067	84.995	100 - 49.2 - 13.5 - 2.66 - 0.419		PC(20:5(5Z,8Z,11Z,14Z,17Z)/16:0)		780.553	1	18.8226	0.0168013	0.0282315	3.36832	V1 37
18.82_780.5530m/z	YMDB02183		M+H	C44H78NO8P	39	11.5	-1.06067	84.995	100 - 49.2 - 13.5 - 2.66 - 0.419		PC(22:4(7Z,10Z,13Z,16Z)/14:1(9Z))		780.553	1	18.8226	0.0168013	0.0282315	3.36832	V1 37
18.82_780.5530m/z	YMDB02190		M+H	C44H78NO8P	39	11.5	-1.06067	84.995	100 - 49.2 - 13.5 - 2.66 - 0.419		PC(22:5(4Z,7Z,10Z,13Z,16Z)/14:0)		780.553	1	18.8226	0.0168013	0.0282315	3.36832	V1 37
18.82_780.5530m/z	YMDB02192		M+H	C44H78NO8P	39	11.5	-1.06067	84.995	100 - 49.2 - 13.5 - 2.66 - 0.419		PC(22:5(7Z,10Z,13Z,16Z,19Z)/14:0)		780.553	1	18.8226	0.0168013	0.0282315	3.36832	V1 37
19.26_762.5293m/z	YMDB01253		M+H	C40H76NO10P	42.2	20.5	1.74984	92.4545	100 - 44.9 - 11.9 - 2.32 - 0.367		PS(16:0/18:1(9Z))		762.529	1	19.2573	0.00423911	0.012422	3.34986	V1 37
19.10_836.5425n	YMDB01236		M+H, M+NH4	C43H81O13P	48	47.3	1.17444	94.2012	100 - 47.9 - 13.9 - 3 - 0.525		PI(16:0/18:1(9Z))	836.542	854.576	1	19.1033	0.0250666	0.0371401	3.17732	V1 37
19.10_836.5425n	YMDB01241		M+H, M+NH4	C43H81O13P	48	47.1	1.17444	94.2012	100 - 47.9 - 13.9 - 3 - 0.525		PI(18:0/16:1(9Z))	836.542	854.576	1	19.1033	0.0250666	0.0371401	3.17732	V1 37
19.60_810.6017m/z	YMDB01856		M+H	C46H84NO8P	42.7	29	1.15865	86.028	100 - 51.4 - 14.6 - 2.97 - 0.48		PC(16:0/22:4(7Z,10Z,13Z,16Z))		810.602	1	19.5996	0.0133183	0.0246153	3.16676	V1 37
19.60_810.6017m/z	YMDB01897		M+H	C46H84NO8P	42.7	28.9	1.15865	86.028	100 - 51.4 - 14.6 - 2.97 - 0.48		PC(18:0/20:4(5Z,8Z,11Z,14Z))		810.602	1	19.5996	0.0133183	0.0246153	3.16676	V1 37
19.60_810.6017m/z	YMDB01898		M+H	C46H84NO8P	42.7	28.9	1.15865	86.028	100 - 51.4 - 14.6 - 2.97 - 0.48		PC(18:0/20:4(8Z,11Z,14Z,17Z))		810.602	1	19.5996	0.0133183	0.0246153	3.16676	V1 37
19.60_810.6017m/z	YMDB01918		M+H	C46H84NO8P	42.7	28.9	1.15865	86.028	100 - 51.4 - 14.6 - 2.97 - 0.48		PC(18:1(11Z)/20:3(5Z,8Z,11Z))		810.602	1	19.5996	0.0133183	0.0246153	3.16676	V1 37
19.60_810.6017m/z	YMDB01919		M+H	C46H84NO8P	42.7	28.9	1.15865	86.028	100 - 51.4 - 14.6 - 2.97 - 0.48		PC(18:1(11Z)/20:3(8Z,11Z,14Z))		810.602	1	19.5996	0.0133183	0.0246153	3.16676	V1 37
19.60_810.6017m/z	YMDB01942		M+H	C46H84NO8P	42.7	28.9	1.15865	86.028	100 - 51.4 - 14.6 - 2.97 - 0.48		PC(18:1(9Z)/20:3(5Z,8Z,11Z))		810.602	1	19.5996	0.0133183	0.0246153	3.16676	V1 37
19.60_810.6017m/z	YMDB01943		M+H	C46H84NO8P	42.7	28.9	1.15865	86.028	100 - 51.4 - 14.6 - 2.97 - 0.48		PC(18:1(9Z)/20:3(8Z,11Z,14Z))		810.602	1	19.5996	0.0133183	0.0246153	3.16676	V1 37
19.60_810.6017m/z	YMDB01967		M+H	C46H84NO8P	42.7	28.9	1.15865	86.028	100 - 51.4 - 14.6 - 2.97 - 0.48		PC(18:2(9Z,12Z)/20:2(11Z,14Z))		810.602	1	19.5996	0.0133183	0.0246153	3.16676	V1 37
19.60_810.6017m/z	YMDB01988		M+H	C46H84NO8P	42.7	28.9	1.15865	86.028	100 - 51.4 - 14.6 - 2.97 - 0.48		PC(18:3(6Z,9Z,12Z)/20:1(11Z))		810.602	1	19.5996	0.0133183	0.0246153	3.16676	V1 37
19.60_810.6017m/z	YMDB02009		M+H	C46H84NO8P	42.7	28.9	1.15865	86.028	100 - 51.4 - 14.6 - 2.97 - 0.48		PC(18:3(9Z,12Z,15Z)/20:1(11Z))		810.602	1	19.5996	0.0133183	0.0246153	3.16676	V1 37
19.60_810.6017m/z	YMDB02026		M+H	C46H84NO8P	42.7	28.9	1.15865	86.028	100 - 51.4 - 14.6 - 2.97 - 0.48		PC(18:4(6Z,9Z,12Z,15Z)/20:0)		810.602	1	19.5996	0.0133183	0.0246153	3.16676	V1 37
19.60_810.6017m/z	YMDB02040		M+H	C46H84NO8P	42.7	28.9	1.15865	86.028	100 - 51.4 - 14.6 - 2.97 - 0.48		PC(20:0/18:4(6Z,9Z,12Z,15Z))		810.602	1	19.5996	0.0133183	0.0246153	3.16676	V1 37
19.60_810.6017m/z	YMDB02055		M+H	C46H84NO8P	42.7	28.9	1.15865	86.028	100 - 51.4 - 14.6 - 2.97 - 0.48		PC(20:1(11Z)/18:3(6Z,9Z,12Z))		810.602	1	19.5996	0.0133183	0.0246153	3.16676	V1 37
19.60_810.6017m/z	YMDB02056		M+H	C46H84NO8P	42.7	28.9	1.15865	86.028	100 - 51.4 - 14.6 - 2.97 - 0.48		PC(20:1(11Z)/18:3(9Z,12Z,15Z))		810.602	1	19.5996	0.0133183	0.0246153	3.16676	V1 37
19.60_810.6017m/z	YMDB02073		M+H	C46H84NO8P	42.7	28.9	1.15865	86.028	100 - 51.4 - 14.6 - 2.97 - 0.48		PC(20:2(11Z,14Z)/18:2(9Z,12Z))		810.602	1	19.5996	0.0133183	0.0246153	3.16676	V1 37
19.60_810.6017m/z	YMDB02092		M+H	C46H84NO8P	42.7	28.9	1.15865	86.028	100 - 51.4 - 14.6 - 2.97 - 0.48		PC(20:3(5Z,8Z,11Z)/18:1(11Z))		810.602	1	19.5996	0.0133183	0.0246153	3.16676	V1 37
19.60_810.6017m/z	YMDB02093		M+H	C46H84NO8P	42.7	28.9	1.15865	86.028	100 - 51.4 - 14.6 - 2.97 - 0.48		PC(20:3(5Z,8Z,11Z)/18:1(9Z))		810.602	1	19.5996	0.0133183	0.0246153	3.16676	V1 37
19.60_810.6017m/z	YMDB02110		M+H	C46H84NO8P	42.7	28.9	1.15865	86.028	100 - 51.4 - 14.6 - 2.97 - 0.48		PC(20:3(8Z,11Z,14Z)/18:1(11Z))		810.602	1	19.5996	0.0133183	0.0246153	3.16676	V1 37
19.60_810.6017m/z	YMDB02111		M+H	C46H84NO8P	42.7	28.9	1.15865	86.028	100 - 51.4 - 14.6 - 2.97 - 0.48		PC(20:3(8Z,11Z,14Z)/18:1(9Z))		810.602	1	19.5996	0.0133183	0.0246153	3.16676	V1 37
17.55_808.5121n	YMDB01228		M+H, M+NH4	C41H77O13P	42.3	30.8	2.33244	83.633	100 - 45.7 - 12.9 - 2.71 - 0.463		PI(14:0/18:1(9Z))	808.512	826.546	1	17.5492	0.0374756	0.0494597	3.09637	V1 37
17.55_808.5121n	YMDB01232		M+H, M+NH4	C41H77O13P	42.3	30.8	2.33244	83.633	100 - 45.7 - 12.9 - 2.71 - 0.463		PI(14:1(9Z)/18:0)	808.512	826.546	1	17.5492	0.0374756	0.0494597	3.09637	V1 37
17.55_808.5121n	YMDB01235		M+H, M+NH4	C41H77O13P	42.3	30.8	2.33244	83.633	100 - 45.7 - 12.9 - 2.71 - 0.463		PI(16:0/16:1(9Z))	808.512	826.546	1	17.5492	0.0374756	0.0494597	3.09637	V1 37
19.48_766.5561m/z	YMDB01210		M+NH4	C40H77O10P	36.3	11	-4.21922	75.6255	100 - 44.5 - 11.7 - 2.28 - 0.359		PG(16:0/18:1(9Z))		766.556	1	19.4798	0.00814219	0.0182477	3.01896	V1 37
19.27_862.5604n	YMDB01244		M+H, M+NH4	C45H83O13P	40.7	27.4	3.82427	80.3929	100 - 50.1 - 15 - 3.31 - 0.592		PI(18:1(9Z)/18:1(9Z))	862.56	880.594	1	19.2745	0.00280836	0.00991192	2.92895	V1 37
18.04_744.5542m/z	YMDB01208		M+H	C41H78NO8P	38.7	0.0353	0.51154	93.8673	100 - 45.9 - 11.9 - 2.26 - 0.342		PE(18:1(9Z)/18:1(9Z))		744.554	1	18.0352	0.00167492	0.00723089	2.90416	V1 37
17.60_778.5378m/z	YMDB01826		M+H	C44H76NO8P	39.3	10.9	-0.409262	85.9343	100 - 49.1 - 13.5 - 2.66 - 0.419		PC(14:0/22:6(4Z,7Z,10Z,13Z,16Z,19Z))		778.538	1	17.6005	0.00584711	0.0150098	2.81335	V1 37
17.60_778.5378m/z	YMDB01841		M+H	C44H76NO8P	39.3	10.9	-0.409262	85.9343	100 - 49.1 - 13.5 - 2.66 - 0.419		PC(14:1(9Z)/22:5(4Z,7Z,10Z,13Z,16Z))		778.538	1	17.6005	0.00584711	0.0150098	2.81335	V1 37
17.60_778.5378m/z	YMDB01842		M+H	C44H76NO8P	39.3	10.9	-0.409262	85.9343	100 - 49.1 - 13.5 - 2.66 - 0.419		PC(14:1(9Z)/22:5(7Z,10Z,13Z,16Z,19Z))		778.538	1	17.6005	0.00584711	0.0150098	2.81335	V1 37
17.60_778.5378m/z	YMDB01877		M+H	C44H76NO8P	39.4	11.4	-0.409262	85.9343	100 - 49.1 - 13.5 - 2.66 - 0.419		PC(16:1(9Z)/20:5(5Z,8Z,11Z,14Z,17Z))		778.538	1	17.6005	0.00584711	0.0150098	2.81335	V1 37
17.60_778.5378m/z	YMDB01965		M+H	C44H76NO8P	39.3	10.9	-0.409262	85.9343	100 - 49.1 - 13.5 - 2.66 - 0.419		PC(18:2(9Z,12Z)/18:4(6Z,9Z,12Z,15Z))		778.538	1	17.6005	0.00584711	0.0150098	2.81335	V1 37
17.60_778.5378m/z	YMDB01985		M+H	C44H76NO8P	39.3	10.9	-0.409262	85.9343	100 - 49.1 - 13.5 - 2.66 - 0.419		PC(18:3(6Z,9Z,12Z)/18:3(6Z,9Z,12Z))		778.538	1	17.6005	0.00584711	0.0150098	2.81335	V1 37
17.60_778.5378m/z	YMDB01986		M+H	C44H76NO8P	39.3	10.9	-0.409262	85.9343	100 - 49.1 - 13.5 - 2.66 - 0.419		PC(18:3(6Z,9Z,12Z)/18:3(9Z,12Z,15Z))		778.538	1	17.6005	0.00584711	0.0150098	2.81335	V1 37
17.60_778.5378m/z	YMDB02006		M+H	C44H76NO8P	39.3	10.9	-0.409262	85.9343	100 - 49.1 - 13.5 - 2.66 - 0.419		PC(18:3(9Z,12Z,15Z)/18:3(6Z,9Z,12Z))		778.538	1	17.6005	0.00584711	0.0150098	2.81335	V1 37
17.60_778.5378m/z	YMDB02007		M+H	C44H76NO8P	39.3	10.9	-0.409262	85.9343	100 - 49.1 - 13.5 - 2.66 - 0.419		PC(18:3(9Z,12Z,15Z)/18:3(9Z,12Z,15Z))		778.538	1	17.6005	0.00584711	0.0150098	2.81335	V1 37
17.60_778.5378m/z	YMDB02025		M+H	C44H76NO8P	39.3	10.9	-0.409262	85.9343	100 - 49.1 - 13.5 - 2.66 - 0.419		PC(18:4(6Z,9Z,12Z,15Z)/18:2(9Z,12Z))		778.538	1	17.6005	0.00584711	0.0150098	2.81335	V1 37
17.60_778.5378m/z	YMDB02140		M+H	C44H76NO8P	39.4	11.4	-0.409262	85.9343	100 - 49.1 - 13.5 - 2.66 - 0.419		PC(20:5(5Z,8Z,11Z,14Z,17Z)/16:1(9Z))		778.538	1	17.6005	0.00584711	0.0150098	2.81335	V1 37
17.60_778.5378m/z	YMDB02191		M+H	C44H76NO8P	39.3	10.9	-0.409262	85.9343	100 - 49.1 - 13.5 - 2.66 - 0.419		PC(22:5(4Z,7Z,10Z,13Z,16Z)/14:1(9Z))		778.538	1	17.6005	0.00584711	0.0150098	2.81335	V1 37
17.60_778.5378m/z	YMDB02193		M+H	C44H76NO8P	39.3	10.9	-0.409262	85.9343	100 - 49.1 - 13.5 - 2.66 - 0.419		PC(22:5(7Z,10Z,13Z,16Z,19Z)/14:1(9Z))		778.538	1	17.6005	0.00584711	0.0150098	2.81335	V1 37
17.60_778.5378m/z	YMDB02194		M+H	C44H76NO8P	39.3	10.9	-0.409262	85.9343	100 - 49.1 - 13.5 - 2.66 - 0.419		PC(22:6(4Z,7Z,10Z,13Z,16Z,19Z)/14:0)		778.538	1	17.6005	0.00584711	0.0150098	2.81335	V1 37
24.10_880.7192m/z	YMDB02293		M+H	C52H98NO7P	36.2	0.0497	4.37413	85.9947	100 - 58 - 18 - 3.91 - 0.668		PC(o-22:1(13Z)/22:3(10Z,13Z,16Z))		880.719	1	24.101	0.000584344	0.00408395	2.80744	V1 37
24.10_880.7192m/z	YMDB02294		M+H	C52H98NO7P	36.2	0.0497	4.37413	85.9947	100 - 58 - 18 - 3.91 - 0.668		PC(o-22:2(13Z,16Z)/22:2(13Z,16Z))		880.719	1	24.101	0.000584344	0.00408395	2.80744	V1 37
24.10_880.7192m/z	YMDB02298		M+H	C52H98NO7P	36.2	0.0497	4.37413	85.9947	100 - 58 - 18 - 3.91 - 0.668		PC(o-24:0/20:4(8Z,11Z,14Z,17Z))		880.719	1	24.101	0.000584344	0.00408395	2.80744	V1 37
17.19_730.5399m/z	YMDB01185		M+H	C40H76NO8P	38.2	0	2.41548	93.6301	100 - 44.8 - 11.4 - 2.13 - 0.318		PC(16:1(9Z)/16:1(9Z))		730.54	1	17.1897	0.0113477	0.0224973	2.71456	V1 37
20.31_786.6016m/z	YMDB01191		M+H	C44H84NO8P	40.9	7.6	1.08264	98.1145	100 - 49.2 - 13.5 - 2.67 - 0.421		PC(18:1(9Z)/18:1(9Z))		786.602	1	20.3082	0.0342447	0.0462892	2.71405	V1 37
20.31_786.6016m/z	YMDB01822		M+H	C44H84NO8P	39.9	2.91	1.08264	98.1145	100 - 49.2 - 13.5 - 2.67 - 0.421		PC(14:0/22:2(13Z,16Z))		786.602	1	20.3082	0.0342447	0.0462892	2.71405	V1 37
20.31_786.6016m/z	YMDB01838		M+H	C44H84NO8P	39.9	2.91	1.08264	98.1145	100 - 49.2 - 13.5 - 2.67 - 0.421		PC(14:1(9Z)/22:1(13Z))		786.602	1	20.3082	0.0342447	0.0462892	2.71405	V1 37
20.31_786.6016m/z	YMDB01850		M+H	C44H84NO8P	39.9	2.91	1.08264	98.1145	100 - 49.2 - 13.5 - 2.67 - 0.421		PC(16:0/20:2(11Z,14Z))		786.602	1	20.3082	0.0342447	0.0462892	2.71405	V1 37
20.31_786.6016m/z	YMDB01871		M+H	C44H84NO8P	39.9	2.91	1.08264	98.1145	100 - 49.2 - 13.5 - 2.67 - 0.421		PC(16:1(9Z)/20:1(11Z))		786.602	1	20.3082	0.0342447	0.0462892	2.71405	V1 37
20.31_786.6016m/z	YMDB01891		M+H	C44H84NO8P	40.9	7.6	1.08264	98.1145	100 - 49.2 - 13.5 - 2.67 - 0.421		PC(18:0/18:2(9Z,12Z))		786.602	1	20.3082	0.0342447	0.0462892	2.71405	V1 37
20.31_786.6016m/z	YMDB01911		M+H	C44H84NO8P	40.9	7.6	1.08264	98.1145	100 - 49.2 - 13.5 - 2.67 - 0.421		PC(18:1(11Z)/18:1(11Z))		786.602	1	20.3082	0.0342447	0.0462892	2.71405	V1 37
20.31_786.6016m/z	YMDB01912		M+H	C44H84NO8P	40.9	7.6	1.08264	98.1145	100 - 49.2 - 13.5 - 2.67 - 0.421		PC(18:1(11Z)/18:1(9Z))		786.602	1	20.3082	0.0342447	0.0462892	2.71405	V1 37
20.31_786.6016m/z	YMDB01936		M+H	C44H84NO8P	40.9	7.6	1.08264	98.1145	100 - 49.2 - 13.5 - 2.67 - 0.421		PC(18:1(9Z)/18:1(11Z))		786.602	1	20.3082	0.0342447	0.0462892	2.71405	V1 37
20.31_786.6016m/z	YMDB01958		M+H	C44H84NO8P	40.9	7.6	1.08264	98.1145	100 - 49.2 - 13.5 - 2.67 - 0.421		PC(18:2(9Z,12Z)/18:0)		786.602	1	20.3082	0.0342447	0.0462892	2.71405	V1 37
20.31_786.6016m/z	YMDB02053		M+H	C44H84NO8P	39.9	2.91	1.08264	98.1145	100 - 49.2 - 13.5 - 2.67 - 0.421		PC(20:1(11Z)/16:1(9Z))		786.602	1	20.3082	0.0342447	0.0462892	2.71405	V1 37
20.31_786.6016m/z	YMDB02069		M+H	C44H84NO8P	39.9	2.91	1.08264	98.1145	100 - 49.2 - 13.5 - 2.67 - 0.421		PC(20:2(11Z,14Z)/16:0)		786.602	1	20.3082	0.0342447	0.0462892	2.71405	V1 37
20.31_786.6016m/z	YMDB02157		M+H	C44H84NO8P	39.9	2.91	1.08264	98.1145	100 - 49.2 - 13.5 - 2.67 - 0.421		PC(22:1(13Z)/14:1(9Z))		786.602	1	20.3082	0.0342447	0.0462892	2.71405	V1 37
20.31_786.6016m/z	YMDB02169		M+H	C44H84NO8P	39.9	2.91	1.08264	98.1145	100 - 49.2 - 13.5 - 2.67 - 0.421		PC(22:2(13Z,16Z)/14:0)		786.602	1	20.3082	0.0342447	0.0462892	2.71405	V1 37
22.82_650.4762m/z	YMDB01171		M+H	C34H68NO8P	36.7	4.49	1.01228	80.2088	100 - 38.2 - 8.75 - 1.48 - 0.204		PC(10:0/16:0)		650.476	1	22.8209	1.72056e-05	0.0011755	2.61024	V1 37
20.60_744.5543m/z	YMDB01208		M+H	C41H78NO8P	48.5	57.6	0.706221	85.649	100 - 45.9 - 11.9 - 2.26 - 0.342		PE(18:1(9Z)/18:1(9Z))		744.554	1	20.5992	0.00582112	0.0149836	2.42283	V1 37
19.15_716.5238m/z	YMDB01203		M+H	C39H74NO8P	53.4	74.7	1.811	94.4843	100 - 43.7 - 11 - 2.01 - 0.296		PE(16:1(9Z)/18:1(9Z))		716.524	1	19.1547	0.012885	0.0242109	2.34569	V1 37
23.31_885.7896m/z	YMDB01315		M+H	C57H104O6	39.1	7.14	-1.13475	89.9434	100 - 63.1 - 20.8 - 4.75 - 0.842 - 0.123		TG(18:1(9Z)/18:1(9Z)/18:1(9Z))		885.79	1	23.3069	0.000898478	0.00500621	2.07276	V1 37
19.89_730.5390m/z	YMDB01185		M+H	C40H76NO8P	36.6	0	1.16289	84.3242	100 - 44.8 - 11.4 - 2.13 - 0.318		PC(16:1(9Z)/16:1(9Z))		730.539	1	19.8906	0.00122722	0.00594484	1.84723	V1 37
16.86_710.4775m/z	YMDB01199		M+Na-2H	C37H72NO8P	38.3	5.05	4.72358	92.093	100 - 41.5 - 10 - 1.79 - 0.256		PE(16:0/16:1(9Z))	http://nonlinear.com/redirect/outbound?p=hmdb&param=YMDB01199	710.477	1	16.8564	0.0183796	0.131877	1.81127	V1 37
24.20_1032.3668m/z	YMDB00470		M+H	C39H68N7O17P3S	31.4	0	-0.964564	57.9268	100 - 47 - 18.8 - 5.34 - 1.26 - 0.25		trans-octadec-2-enoyl-CoA		1032.37	1	24.2037	0.0321009	0.0441401	1.77397	V1 37
24.20_1032.3668m/z	YMDB00539		M+H	C39H68N7O17P3S	31.4	0	-0.964564	57.9268	100 - 47 - 18.8 - 5.34 - 1.26 - 0.25		oleoyl-CoA		1032.37	1	24.2037	0.0321009	0.0441401	1.77397	V1 37
20.91_1032.3661m/z	YMDB00470		M+H	C39H68N7O17P3S	31.4	1.01	-1.6581	57.9268	100 - 47 - 18.8 - 5.34 - 1.26 - 0.25		trans-octadec-2-enoyl-CoA		1032.37	1	20.9072	0.0479734	0.0591647	1.73451	V1 37
20.91_1032.3661m/z	YMDB00539		M+H	C39H68N7O17P3S	31.4	1.01	-1.6581	57.9268	100 - 47 - 18.8 - 5.34 - 1.26 - 0.25		oleoyl-CoA		1032.37	1	20.9072	0.0479734	0.0591647	1.73451	V1 37
22.43_904.8357m/z	YMDB01302		M+NH4	C57H106O6	36.1	4.36	3.31678	80.2352	100 - 63.1 - 20.8 - 4.76 - 0.843 - 0.123		TG(16:1(9Z)/16:1(9Z)/22:0)		904.836	1	22.4272	0.011968	0.023221	1.56797	V1 37
22.43_904.8357m/z	YMDB01308		M+NH4	C57H106O6	36.4	5.61	3.31678	80.2352	100 - 63.1 - 20.8 - 4.76 - 0.843 - 0.123		TG(16:1(9Z)/18:1(9Z)/20:0)		904.836	1	22.4272	0.011968	0.023221	1.56797	V1 37
22.43_904.8357m/z	YMDB01313		M+NH4	C57H106O6	35.6	1.91	3.31678	80.2352	100 - 63.1 - 20.8 - 4.76 - 0.843 - 0.123		TG(18:0/18:1(9Z)/18:1(9Z))		904.836	1	22.4272	0.011968	0.023221	1.56797	V1 37
16.94_704.5228m/z	YMDB01177		M+H	C38H74NO8P	37.7	3.34	0.38405	85.7948	100 - 42.6 - 10.5 - 1.9 - 0.275		PC(14:0/16:1(9Z))		704.523	1	16.9433	0.0182757	0.0298861	1.50889	V1 37
